# Supplementary material for: Tanjungides A and B: New Antitumoral Bromoindole Derived Compounds from Diazona cf formosa. Isolation and Total Synthesis
Source: PubMed Central journal article supplement (PMC3944533; doi:10.3390/md12021116), 2014-02-21

## Supplementary Information

**Figure S1.**  $^1\text{H}$  NMR spectrum of Tanjungide A (500 MHz,  $\text{DMSO-}d_6$ ).

**Figure S2.**  $^{13}\text{C}$  NMR spectrum of Tanjungide A (500 MHz,  $\text{DMSO-}d_6$ ).

**Figure S3.**  $g$ -COSY spectrum of Tanjungide A.

**Figure S4.**  $g$ -HSQC spectrum of Tanjungide A.

**Figure S5.**  $g$ -HMBC spectrum of Tanjungide A.

**Figure S6.** ROESY spectrum of Tanjungide A.

**Figure S7.**  $^1\text{H}$  NMR spectrum of Tanjungide B (500 MHz,  $\text{CD}_3\text{OD}$ ).

**Figure S8.**  $^{13}\text{C}$  NMR spectrum of Tanjungide B (125 MHz,  $\text{CD}_3\text{OD}$ ).

**Figure S9.**  $g$ -COSY spectrum Tanjungide B.

**Figure S10.**  $g$ -HSQC spectrum of Tanjungide B.

**Figure S11.**  $g$ -HMBC spectrum of Tanjungide B.

**Figure S12.** ROESY spectrum of Tanjungide B.

**Figure S13.**  $^1\text{H}$  NMR spectrum of 5,6-dibromo-1*H*-indole-3-carboxylic acid (**4**) (300 MHz,  $\text{CD}_3\text{OD}$ ).

**Figure S14.**  $^{13}\text{C}$  NMR spectrum of 5,6-dibromo-1*H*-indole-3-carboxylic acid (**4**) (75 MHz,  $\text{CD}_3\text{OD}$ ).

**Figure S15.**  $^1\text{H}$  NMR spectrum of 5,6-dibromo-1*H*-indole (**5**) (300 MHz,  $\text{CDCl}_3$ ).

**Figure S16.**  $^{13}\text{C}$  NMR spectrum of 5,6-dibromo-1*H*-indole (**5**) (75 MHz,  $\text{CDCl}_3$ ).

**Figure S17.**  $^1\text{H}$  NMR spectrum of 5,6-dibromo-1*H*-indole-3-carbaldehyde (**6**) (300 MHz,  $\text{DMSO-}d_6$ ).

**Figure S18.**  $^{13}\text{C}$  NMR spectrum of 5,6-dibromo-1*H*-indole-3-carbaldehyde (**6**) (75 MHz,  $\text{DMSO-}d_6$ ).

**Figure S19.**  $^1\text{H}$  NMR spectrum of *tert*-butyl 5,6-dibromo-3-formyl-1*H*-indole-1-carboxylate (**7**) (300 MHz,  $\text{CDCl}_3$ ).

**Figure S20.**  $^{13}\text{C}$  NMR spectrum of *tert*-butyl 5,6-dibromo-3-formyl-1*H*-indole-1-carboxylate (**7**) (75 MHz,  $\text{CDCl}_3$ ).

**Figure S21.**  $^1\text{H}$  NMR spectrum of (*Z*)-*tert*-butyl 5,6-dibromo-3-(2-iodovinyl)-1*H*-indole-1-carboxylate (**8**) (300 MHz,  $\text{CDCl}_3$ ).

**Figure S22.**  $^{13}\text{C}$  NMR spectrum of (*Z*)-*tert*-butyl 5,6-dibromo-3-(2-iodovinyl)-1*H*-indole-1-carboxylate (**8**) (75 MHz,  $\text{CDCl}_3$ ).

**Figure S23.**  $^1\text{H}$  NMR spectrum of (*R,Z*)-*tert*-butyl 3-(2-(2-(((allyloxy)carbonyl)amino)-3-(tritylthio)propanamido)vinyl)-5,6-dibromo-1*H*-indole-1-carboxylate (**Z-10**) (300 MHz,  $\text{CDCl}_3$ ).

**Figure S24.**  $^{13}\text{C}$  NMR spectrum of (*R,Z*)-*tert*-butyl 3-(2-(2-(((allyloxy)carbonyl)amino)-3-(tritylthio)propanamido)vinyl)-5,6-dibromo-1*H*-indole-1-carboxylate (**Z-10**) (75 MHz,  $\text{CDCl}_3$ ).

**Figure S25.**  $^1\text{H}$  NMR spectrum of (*R,E*)-*tert*-butyl 3-(2-(2-(((allyloxy)carbonyl)amino)-3-(tritylthio)propanamido)vinyl)-5,6-dibromo-1*H*-indole-1-carboxylate (**E-10**) (300 MHz,  $\text{CDCl}_3$ ).

**Figure S26.**  $^{13}\text{C}$  NMR spectrum of (*R,E*)-*tert*-butyl 3-(2-(2-(((allyloxy)carbonyl)amino)-3-(tritylthio)propanamido)vinyl)-5,6-dibromo-1*H*-indole-1-carboxylate (**E-10**) (75 MHz,  $\text{CDCl}_3$ ).

**Figure S27.**  $^1\text{H}$  NMR spectrum of (*R,Z*)-*tert*-butyl 3-(2-(2-amino-3-(tritylthio)propanamido)vinyl)-5,6-dibromo-1*H*-indole-1-carboxylate (**Z-11**) (300 MHz,  $\text{CDCl}_3$ ).

**Figure S28.**  $^{13}\text{C}$  NMR spectrum of (*R,Z*)-*tert*-butyl 3-(2-(2-amino-3-(tritylthio)propanamido)vinyl)-5,6-dibromo-1*H*-indole-1-carboxylate (**Z-11**) (75 MHz,  $\text{CDCl}_3$ ).

**Figure S29.**  $^1\text{H}$  NMR spectrum of (*R,E*)-*tert*-butyl 3-(2-(2-amino-3-(tritylthio)propanamido)vinyl)-5,6-dibromo-1*H*-indole-1-carboxylate (**E-11**) (300 MHz,  $\text{CDCl}_3$ ).

**Figure S30.**  $^{13}\text{C}$  NMR spectrum of (*R,E*)-*tert*-butyl 3-(2-(2-amino-3-(tritylthio)propanamido)vinyl)-5,6-dibromo-1*H*-indole-1-carboxylate (**E-11**) (75 MHz,  $\text{CDCl}_3$ ).

**Figure S31.**  $^1\text{H}$  NMR spectrum of *tert*-butyl 5,6-dibromo-3-(((6*R*,9*R*,*Z*)-2,2-dimethyl-4,7,10-trioxo-6,9-bis((tritylthio)methyl)-3-oxa-5,8,11-triazatridec-12-en-13-yl)-1*H*-indole-1-carboxylate (**Z-12**) (300 MHz,  $\text{CDCl}_3$ ).

**Figure S32.**  $^{13}\text{C}$  NMR spectrum of *tert*-butyl 5,6-dibromo-3-(((6*R*,9*R*,*Z*)-2,2-dimethyl-4,7,10-trioxo-6,9-bis((tritylthio)methyl)-3-oxa-5,8,11-triazatridec-12-en-13-yl)-1*H*-indole-1-carboxylate (**Z-12**) (75 MHz,  $\text{CDCl}_3$ ).

**Figure S33.**  $^1\text{H}$  NMR spectrum of *tert*-butyl 5,6-dibromo-3-(((6*R*,9*R*,*E*)-2,2-dimethyl-4,7,10-trioxo-6,9-bis((tritylthio)methyl)-3-oxa-5,8,11-triazatridec-12-en-13-yl)-1*H*-indole-1-carboxylate (**E-12**) (300 MHz,  $\text{CDCl}_3$ ).

**Figure S34.**  $^1\text{H}$  NMR spectrum of *tert*-butyl 5,6-dibromo-3-(((*Z*)-2-(((4*R*,7*R*)-7-((*tert*-butoxycarbonyl)amino)-6-oxo-1,2,5-dithiazocane-4-carboxamido)vinyl)-1*H*-indole-1-carboxylate (**Z-13**) (300 MHz,  $\text{CDCl}_3$ ).

**Figure S35.**  $^{13}\text{C}$  NMR spectrum of *tert*-butyl 5,6-dibromo-3-(((*Z*)-2-(((4*R*,7*R*)-7-((*tert*-butoxycarbonyl)amino)-6-oxo-1,2,5-dithiazocane-4-carboxamido)vinyl)-1*H*-indole-1-carboxylate (**Z-13**) (75 MHz,  $\text{CDCl}_3$ ).

**Figure S36.**  $^1\text{H}$  NMR spectrum of *tert*-butyl 5,6-dibromo-3-(((*E*)-2-(((4*R*,7*R*)-7-((*tert*-butoxycarbonyl)amino)-6-oxo-1,2,5-dithiazocane-4-carboxamido)vinyl)-1*H*-indole-1-carboxylate (**E-13**) (300 MHz,  $\text{CDCl}_3$ ).

**Figure S37.**  $^{13}\text{C}$  NMR spectrum of *tert*-butyl 5,6-dibromo-3-(((*E*)-2-(((4*R*,7*R*)-7-((*tert*-butoxycarbonyl)amino)-6-oxo-1,2,5-dithiazocane-4-carboxamido)vinyl)-1*H*-indole-1-carboxylate (**E-13**) (75 MHz,  $\text{CDCl}_3$ ).

**Figure S38.**  $^1\text{H}$  NMR spectra of synthetic vs. natural Tanjungide A.

**Figure S39.** Marfey's reaction. Desthiotanjungide A.

Figure S1.  $^1\text{H}$  NMR spectrum of Tanjungide A (500 MHz,  $\text{DMSO-}d_6$ ).

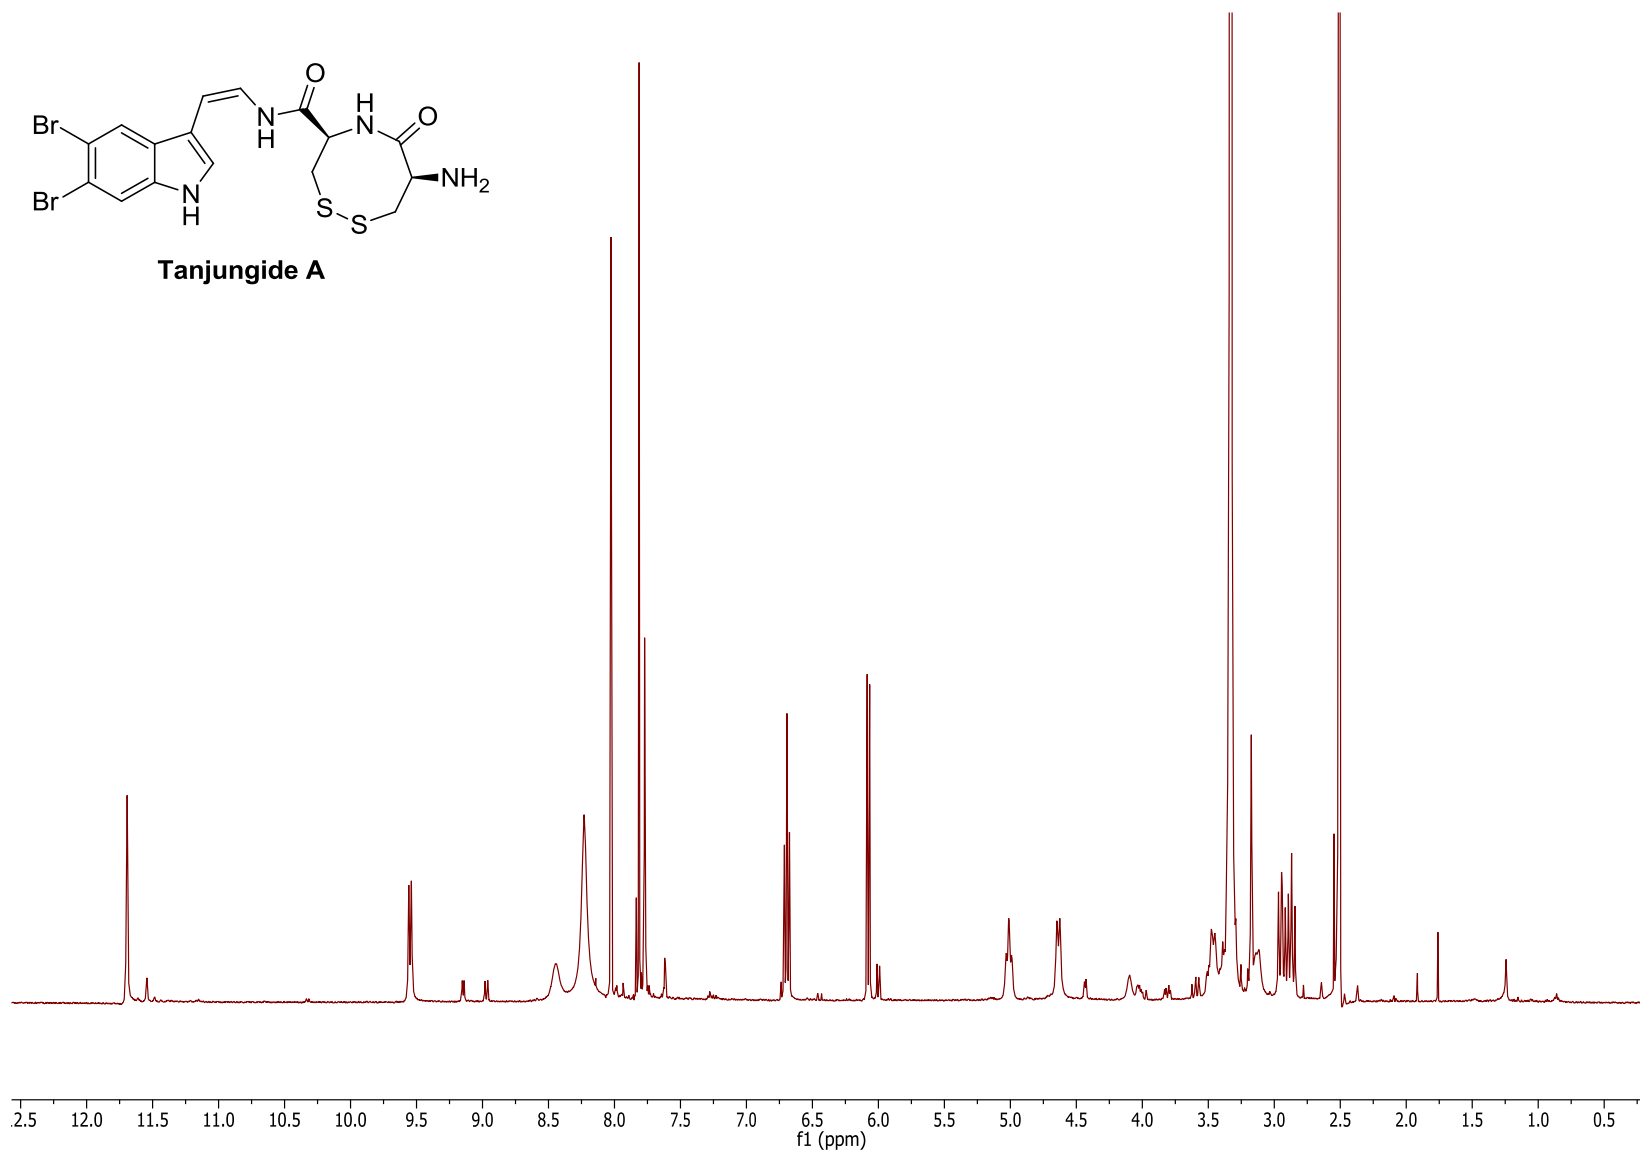

**Figure S2.**  $^{13}\text{C}$  NMR spectrum of Tanjungide A (500 MHz,  $\text{DMSO-}d_6$ ).

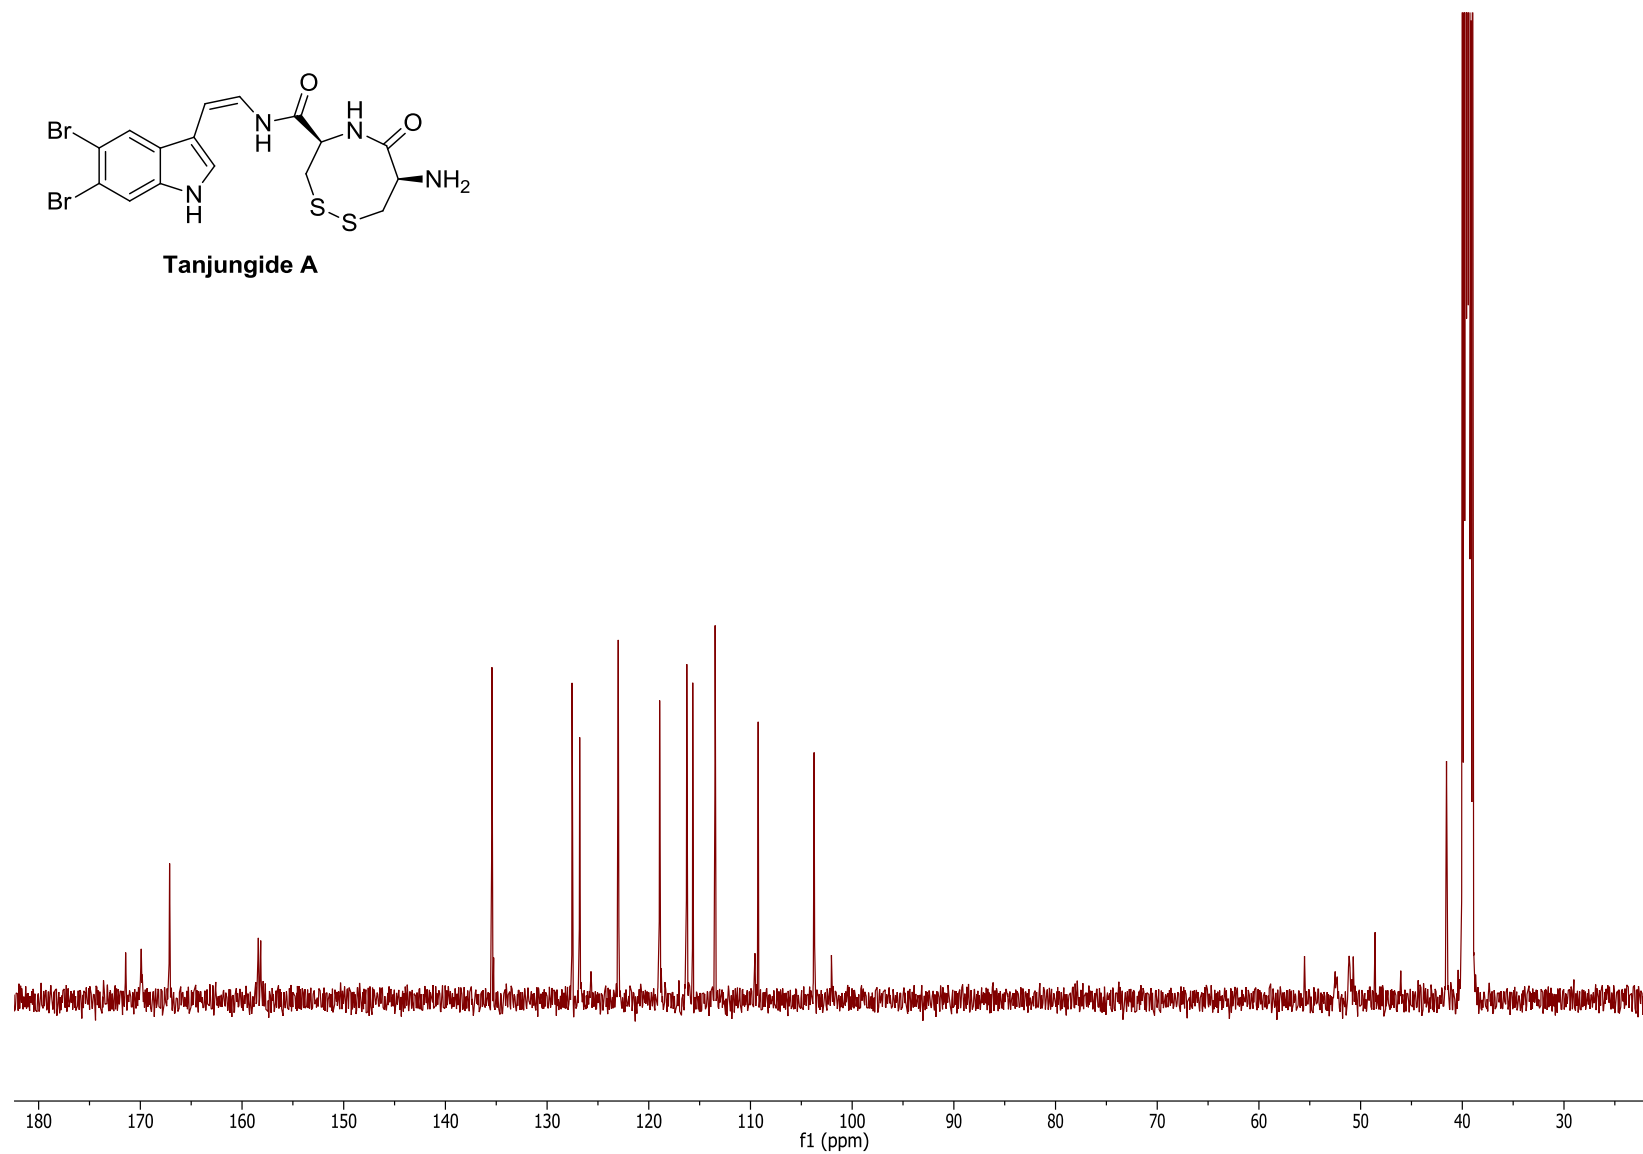

Figure S3. g-COSY spectrum of Tanjungide A.

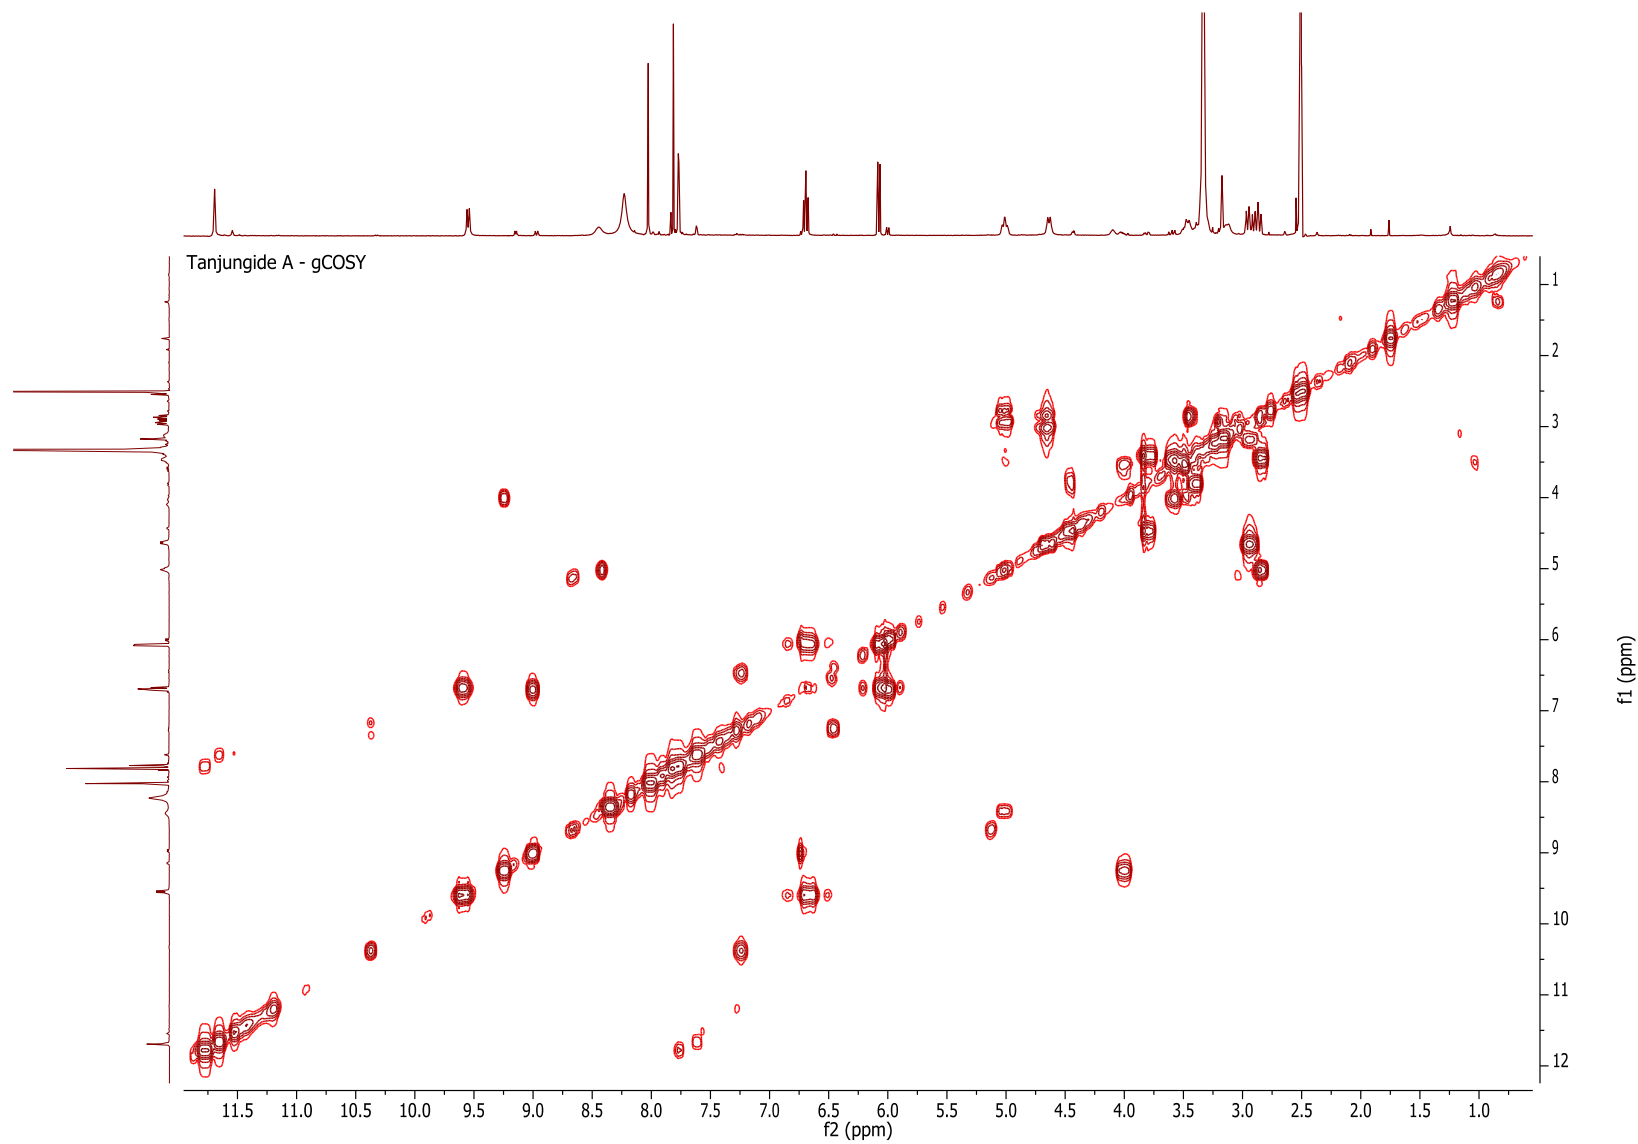

Figure S4. g-HSQC spectrum of Tanjungide A.

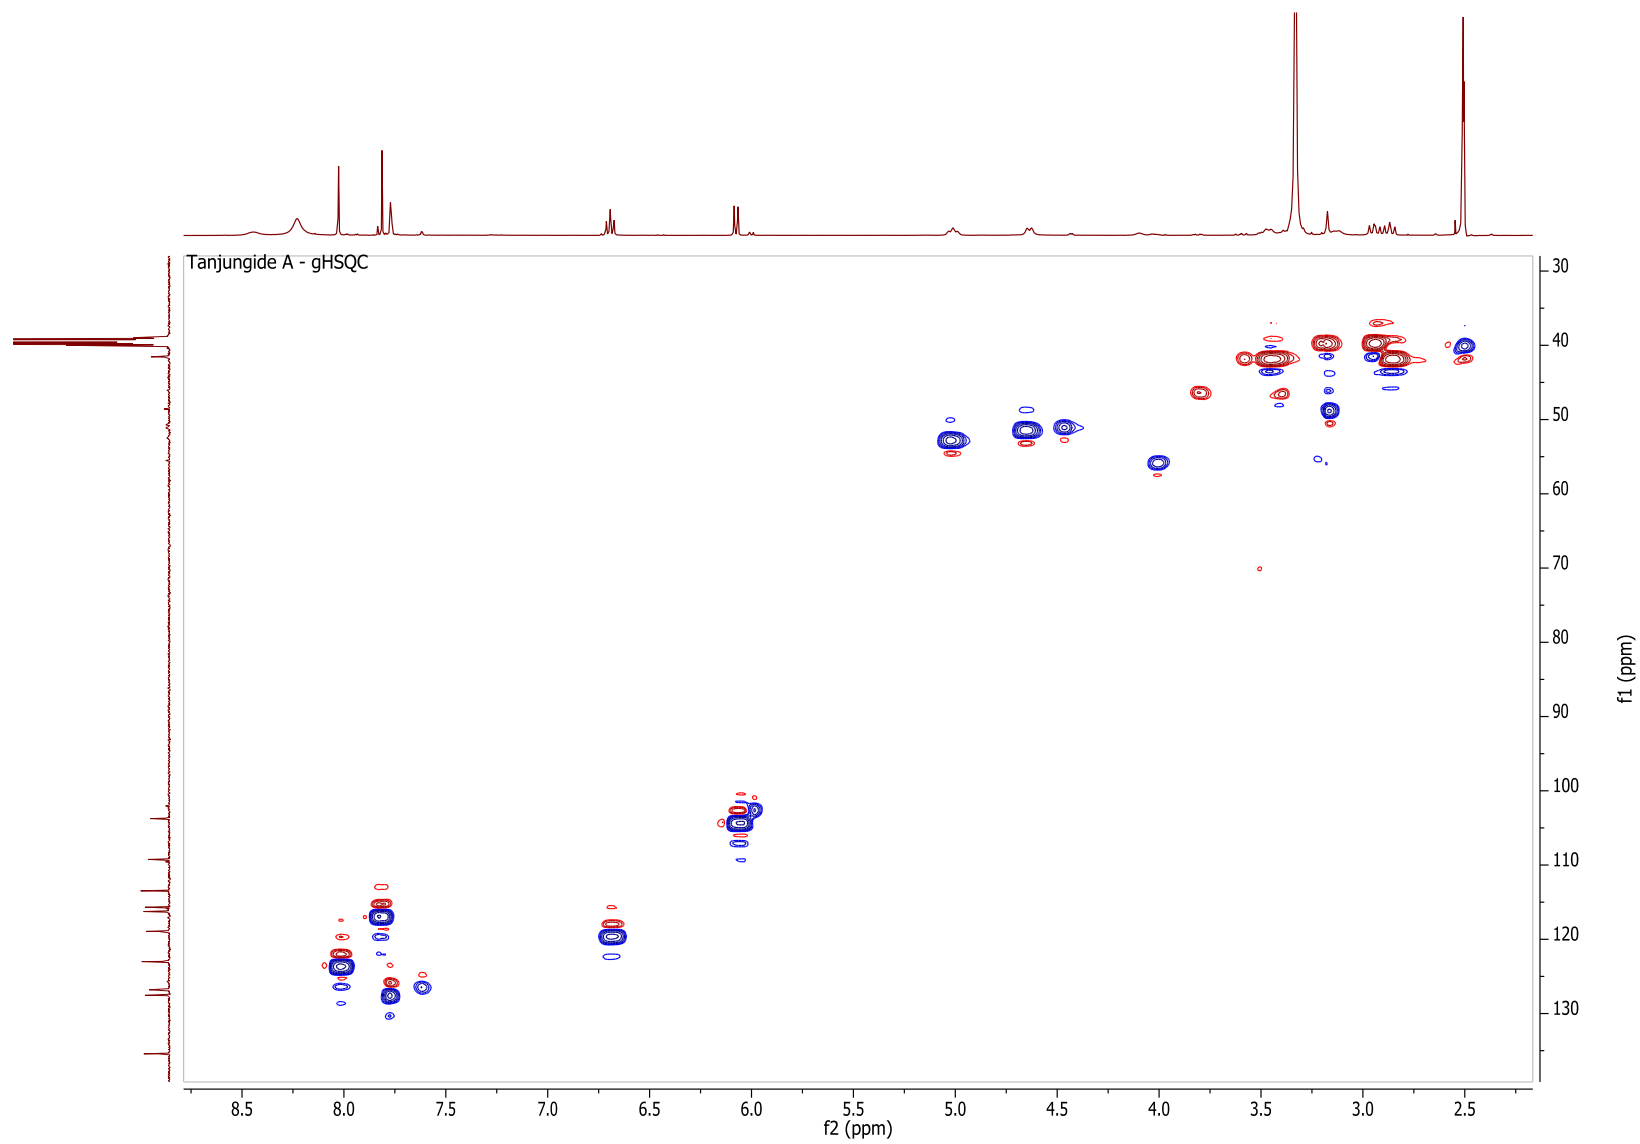

Figure S5. g-HMBC spectrum of Tanjungide A.

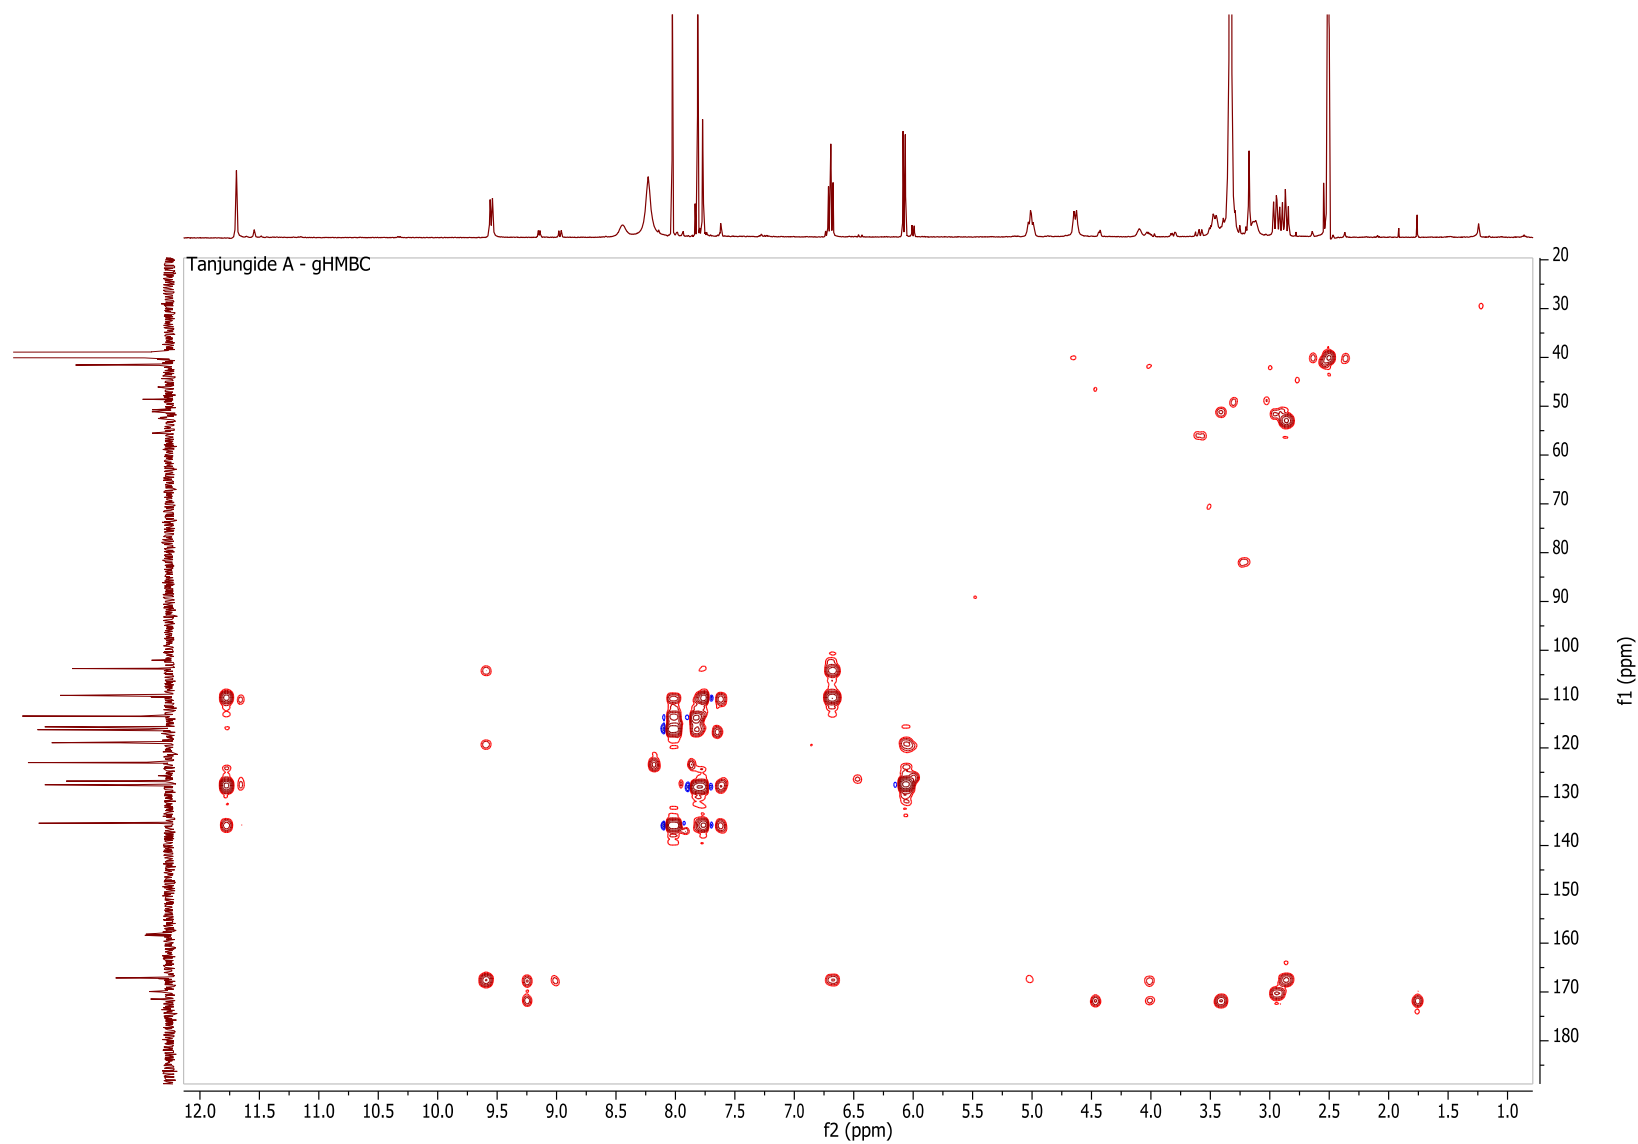

Figure S6. ROESY spectrum of Tanjungide A.

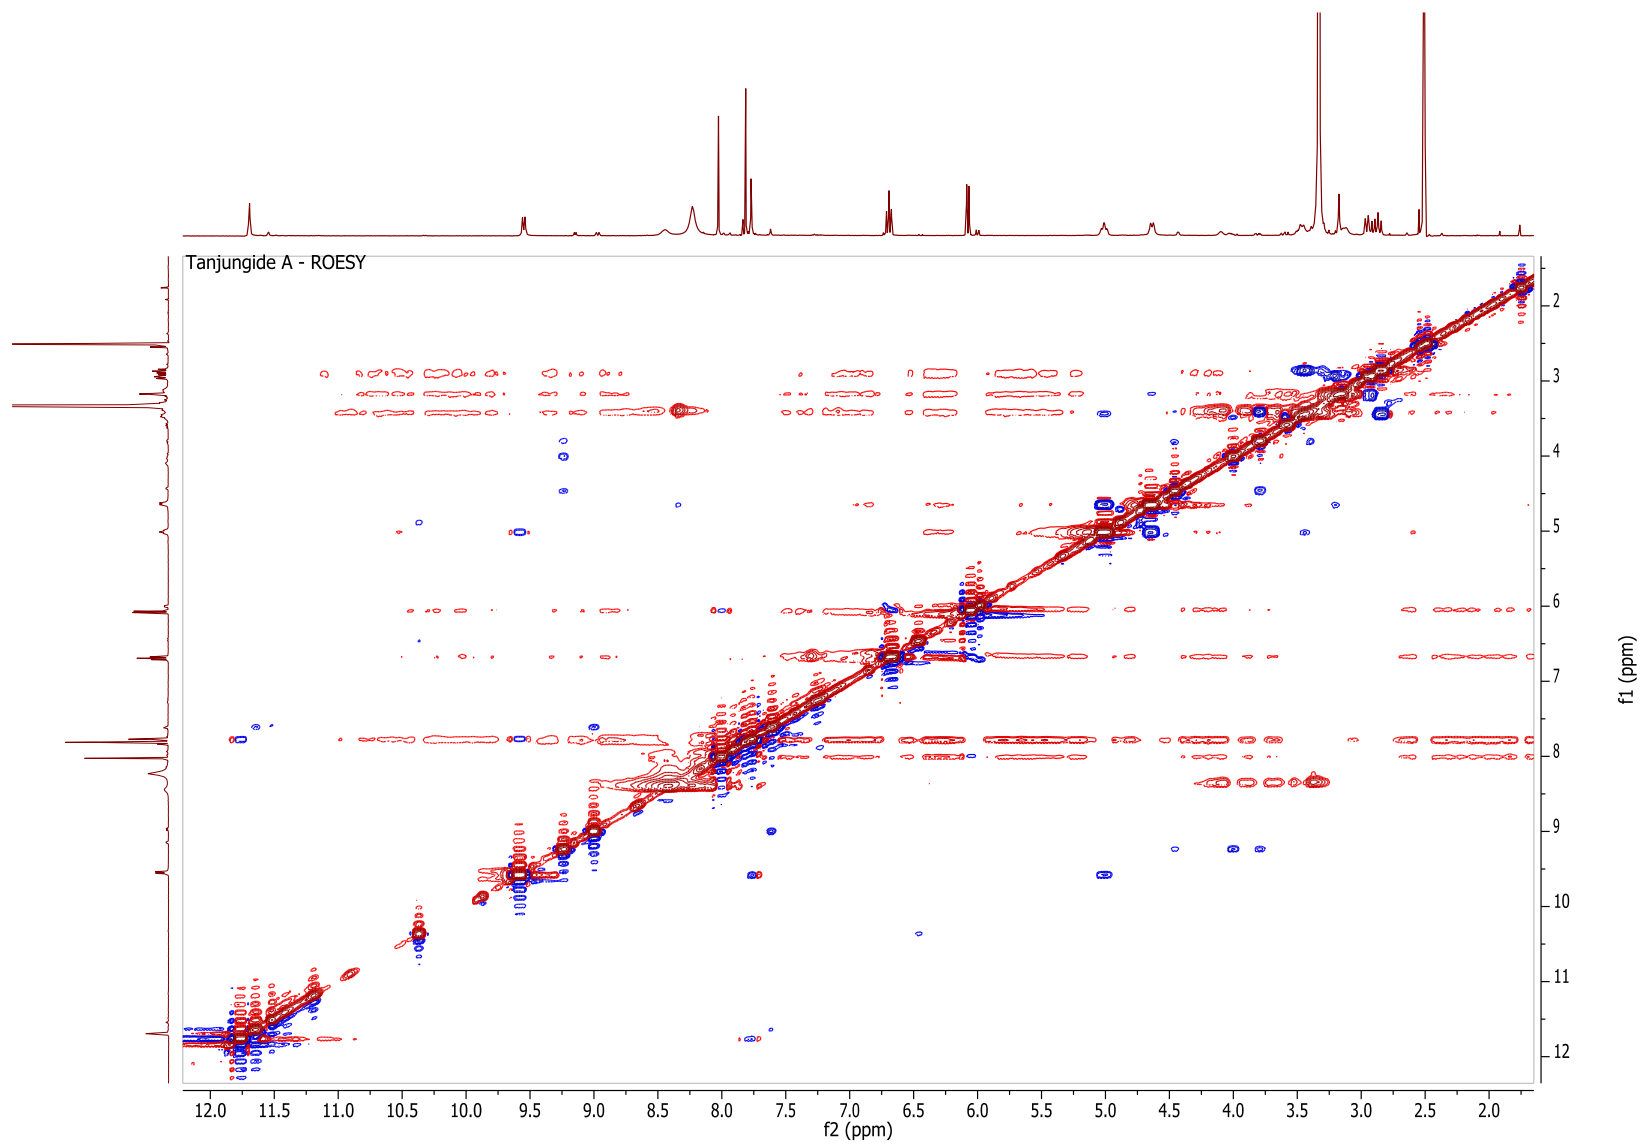



**Figure S7.**  $^1\text{H}$  NMR spectrum of Tanjungide B (500 MHz,  $\text{CD}_3\text{OD}$ )

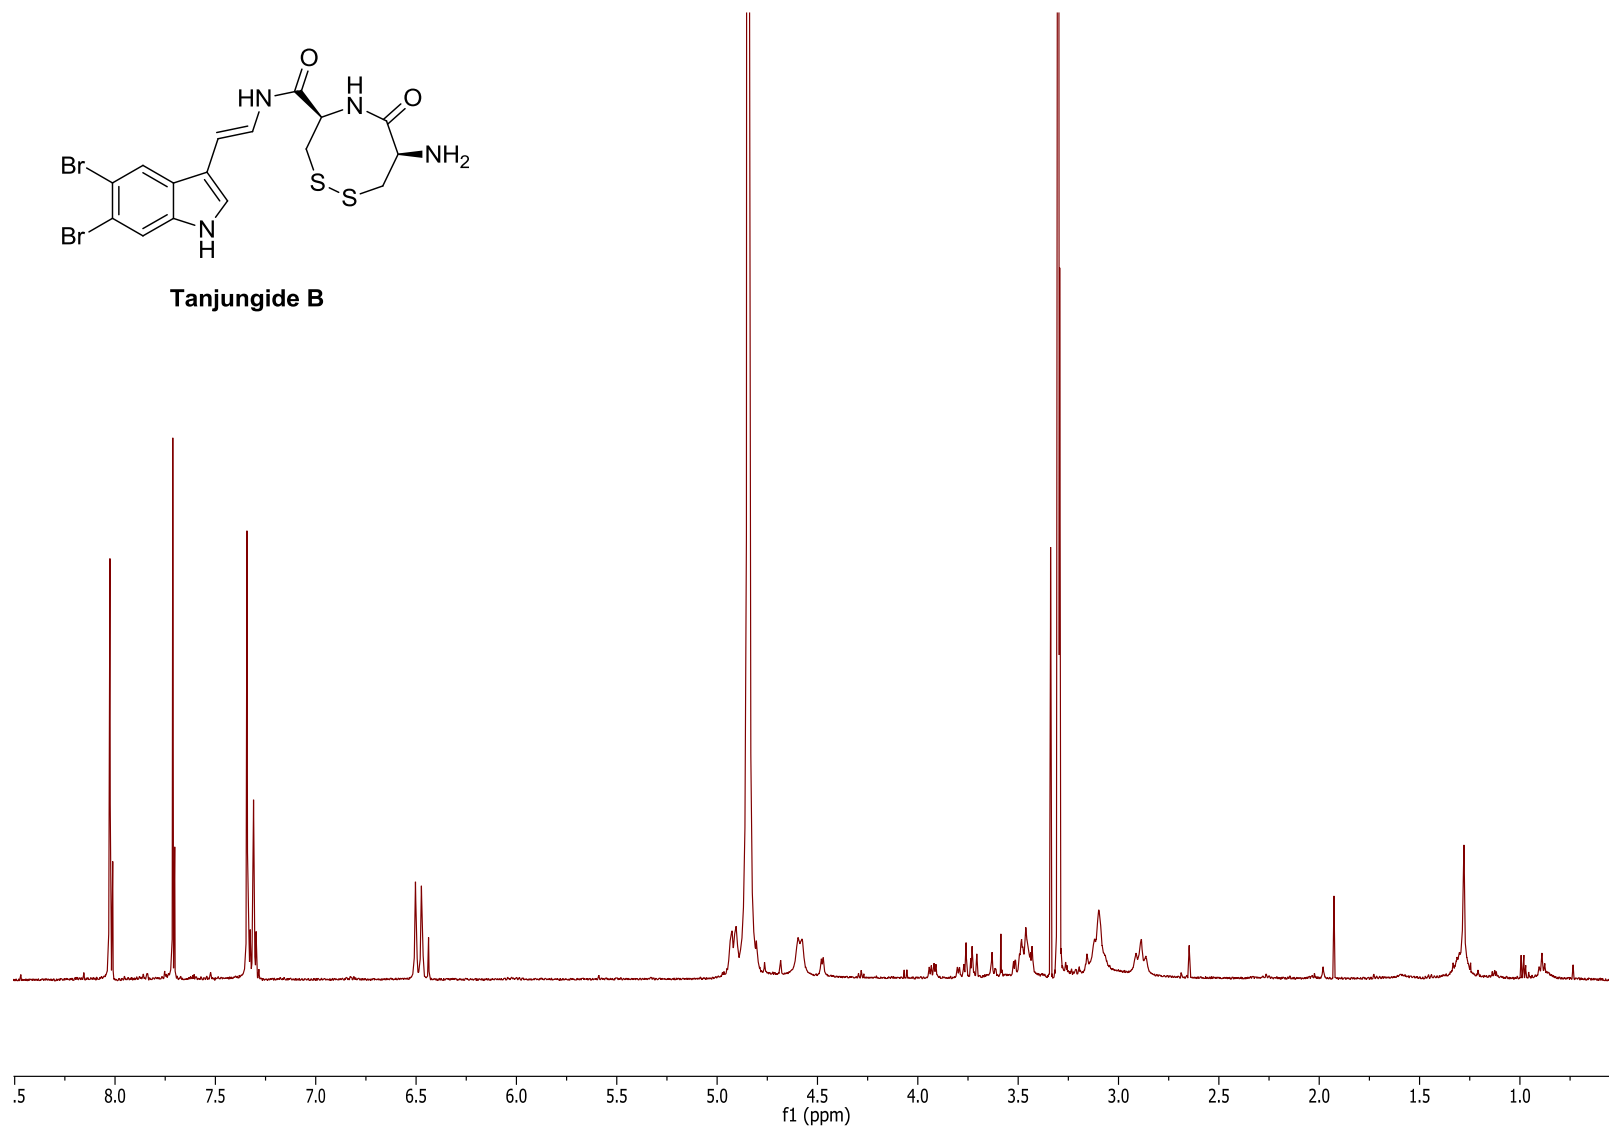

Figure S8.  $^{13}\text{C}$  NMR spectrum of Tanjungide B (125 MHz,  $\text{CD}_3\text{OD}$ ).

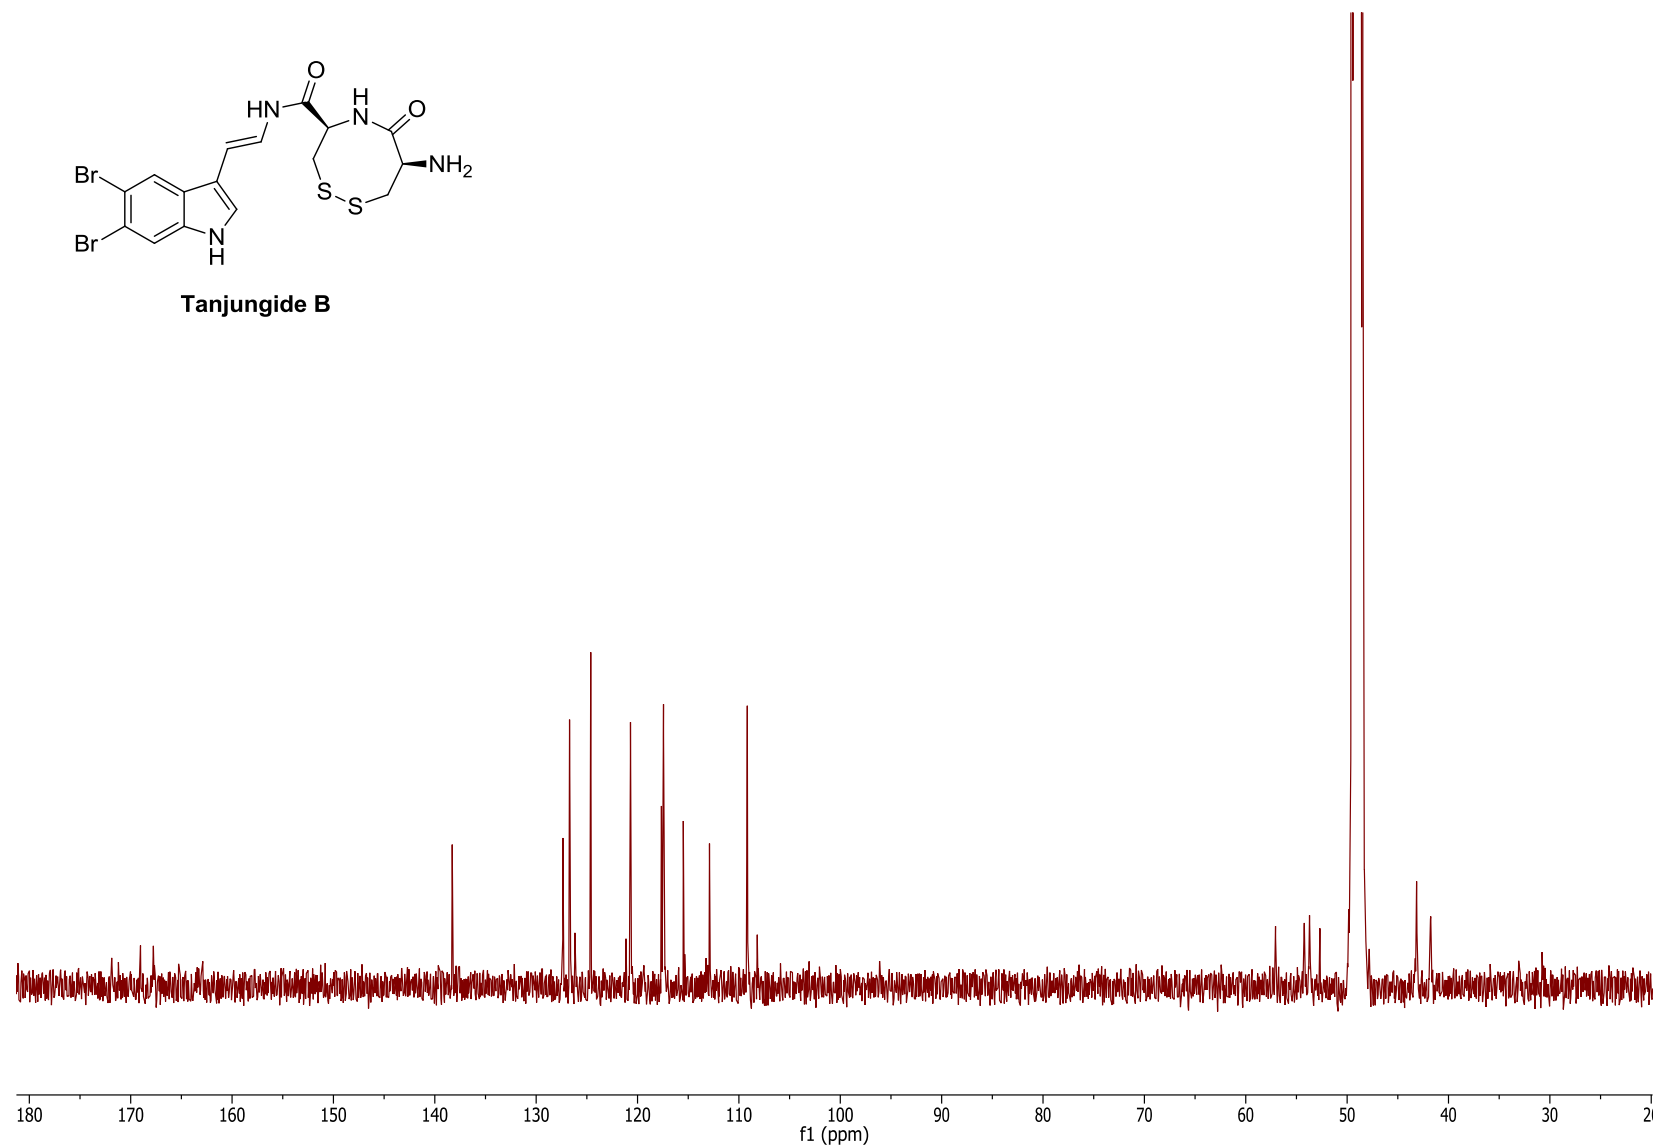

Figure S9. g-COSY spectrum Tanjungide B.

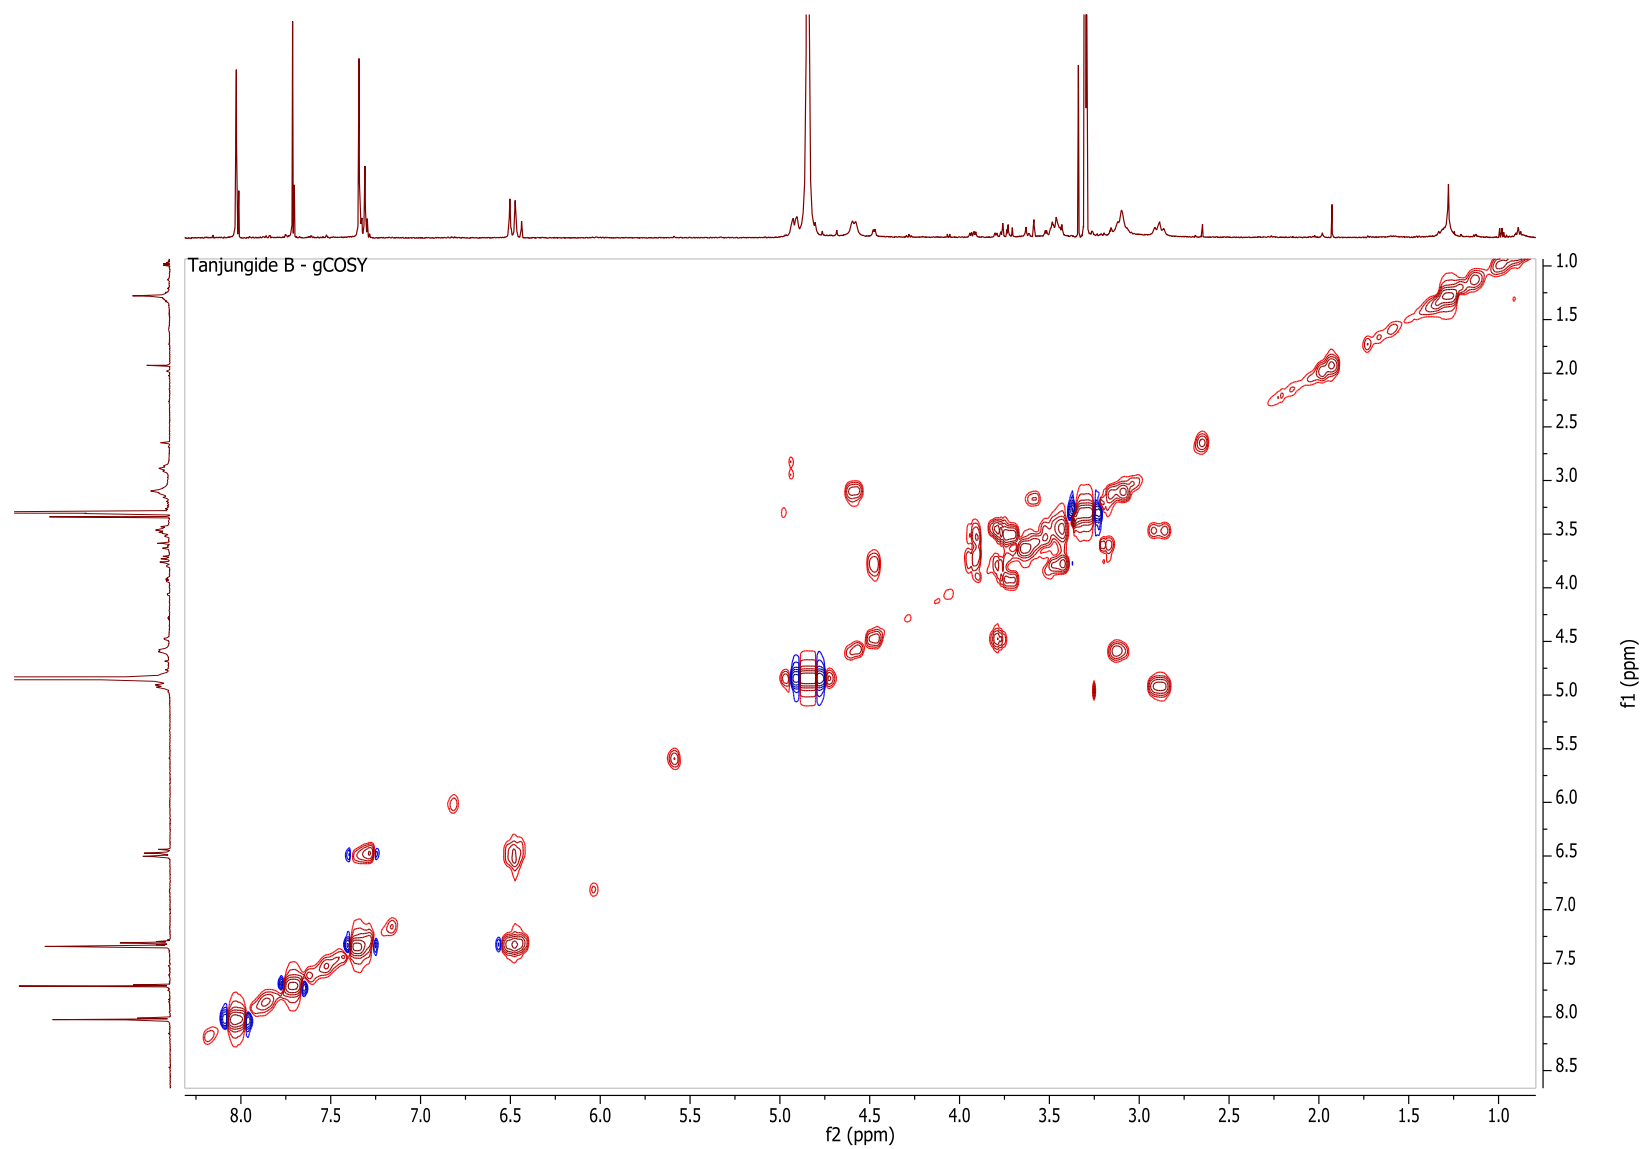

Figure S10. g-HSQC spectrum of Tanjungide B.

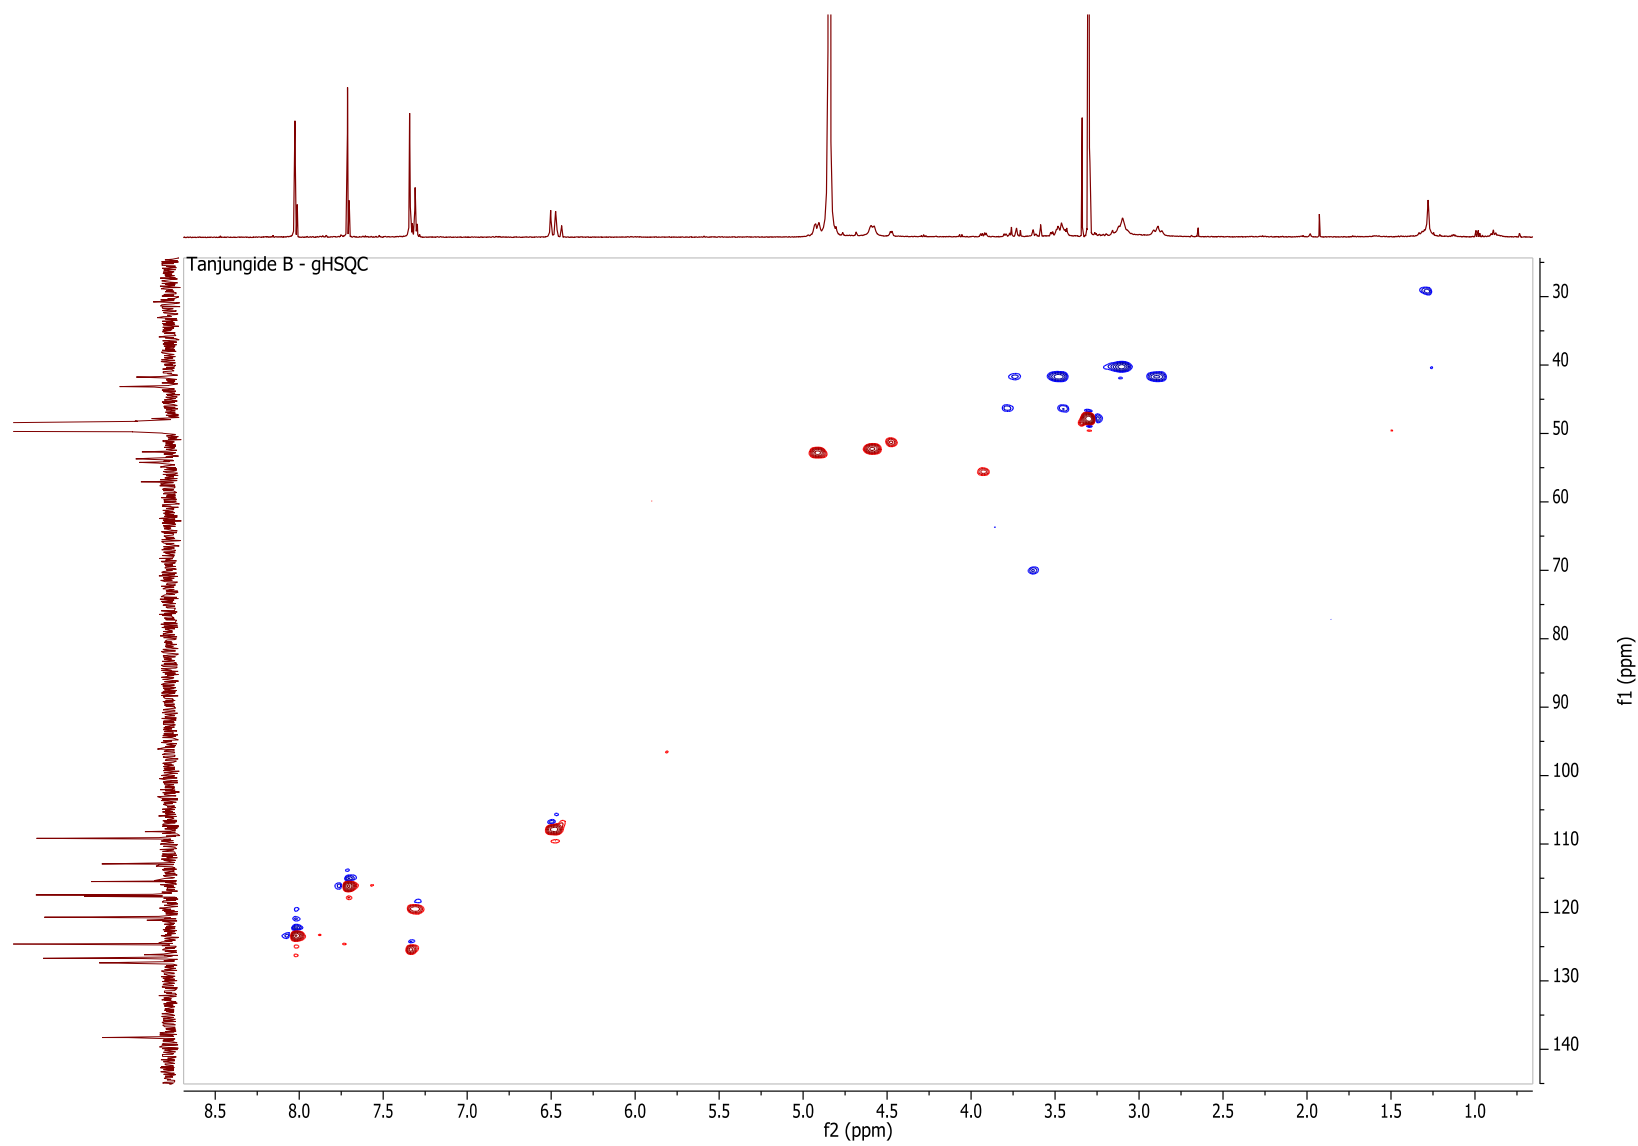

Figure S11. g-HMBC spectrum of Tanjungide B.

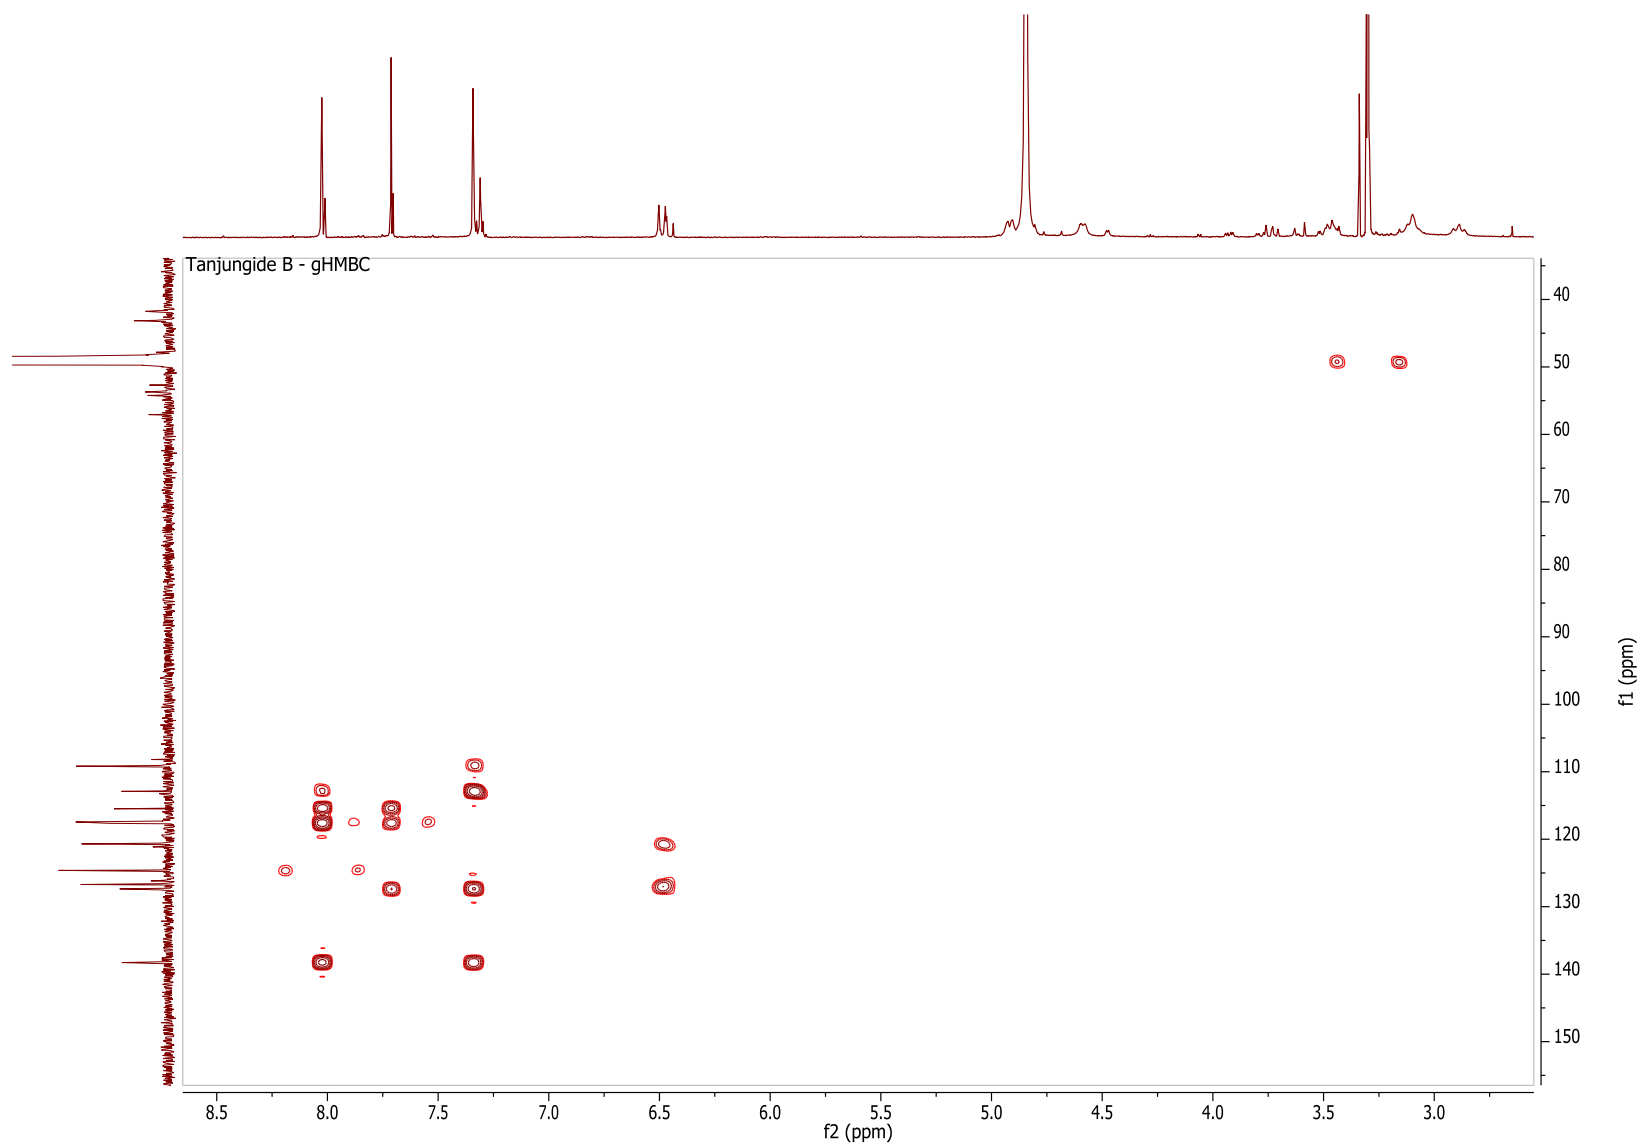

Figure S12. ROESY spectrum of Tanjungide B.

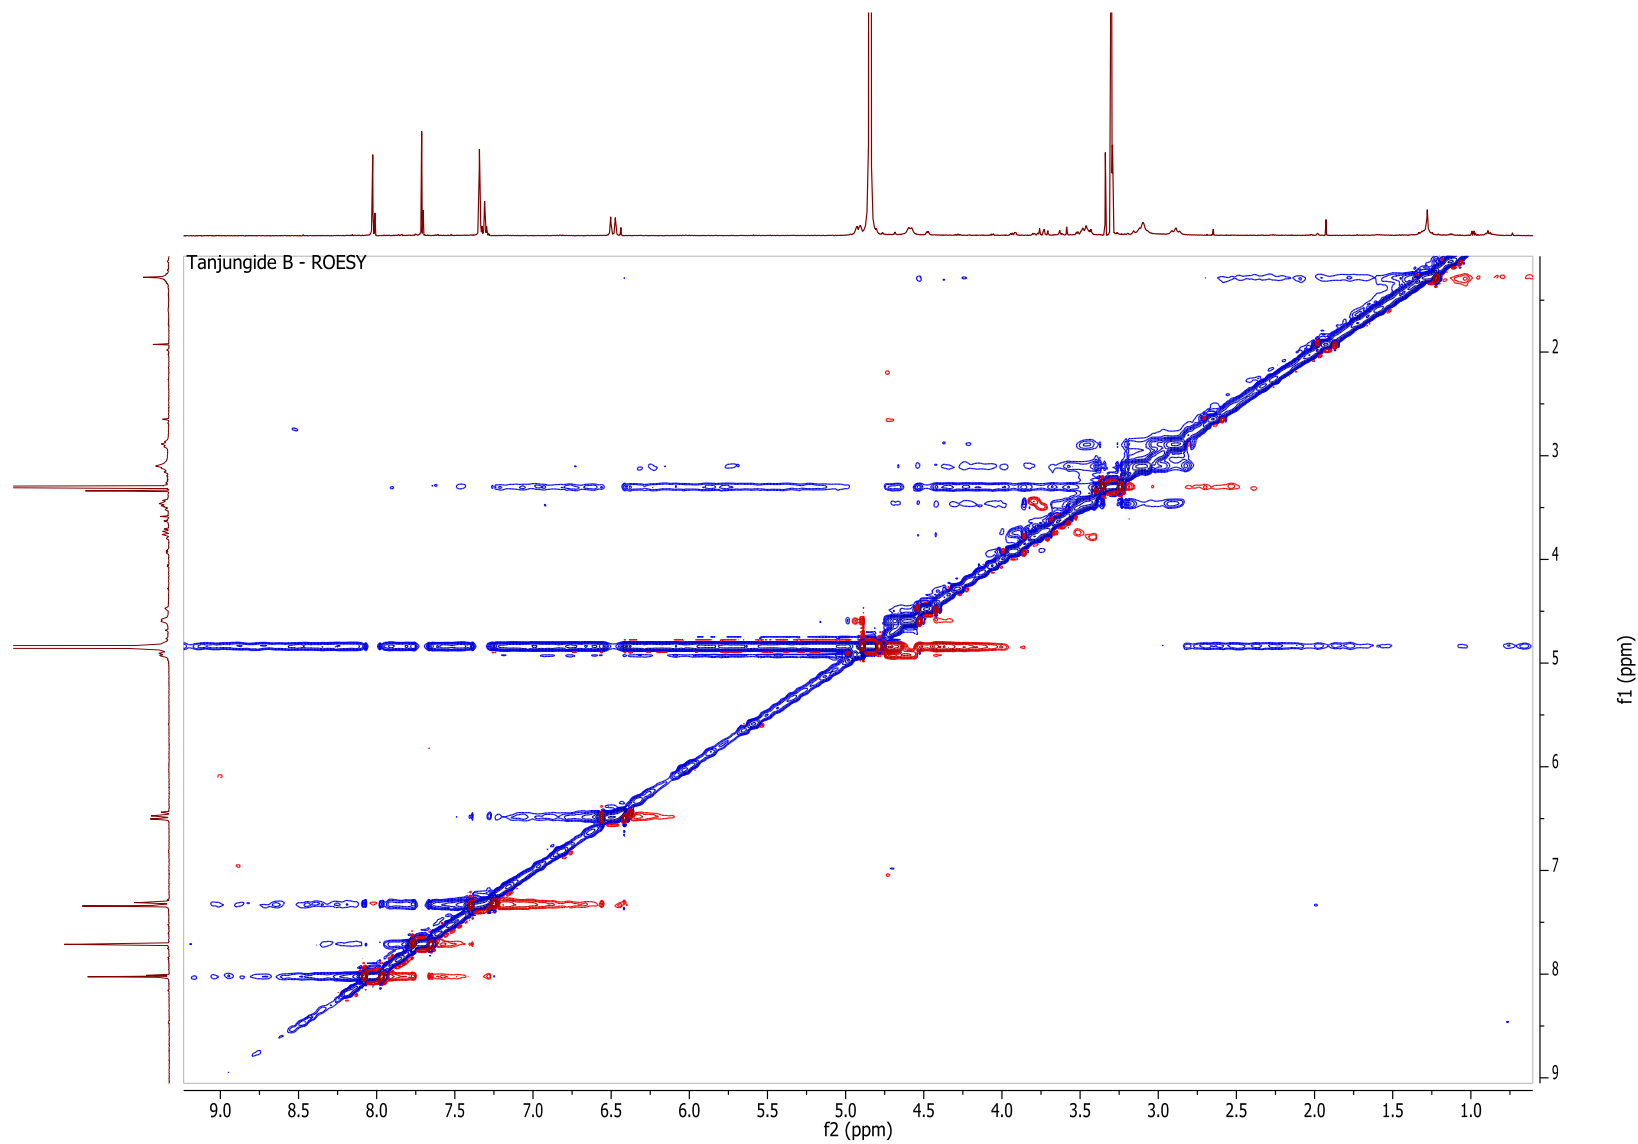

**Figure S13.**  $^1\text{H}$  NMR spectrum of 5,6-dibromo-1*H*-indole-3-carboxylic acid (**4**) (300 MHz,  $\text{CD}_3\text{OD}$ ).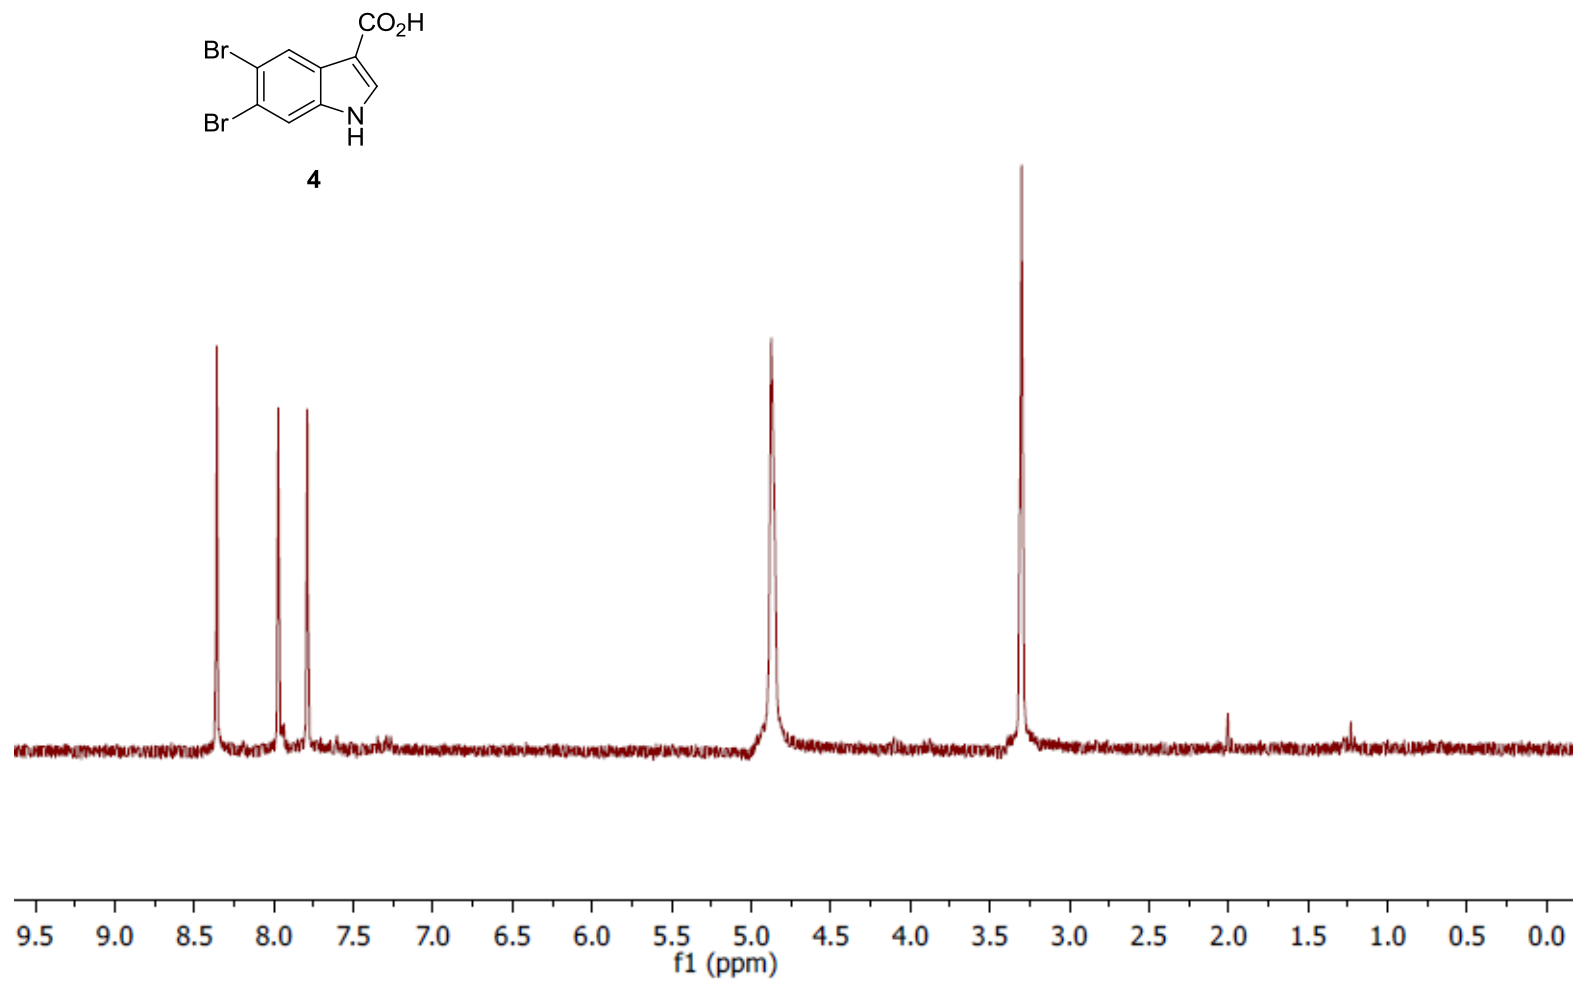

**Figure S14.**  $^{13}\text{C}$  NMR spectrum of 5,6-dibromo-1*H*-indole-3-carboxylic acid (**4**) (75 MHz,  $\text{CD}_3\text{OD}$ ).

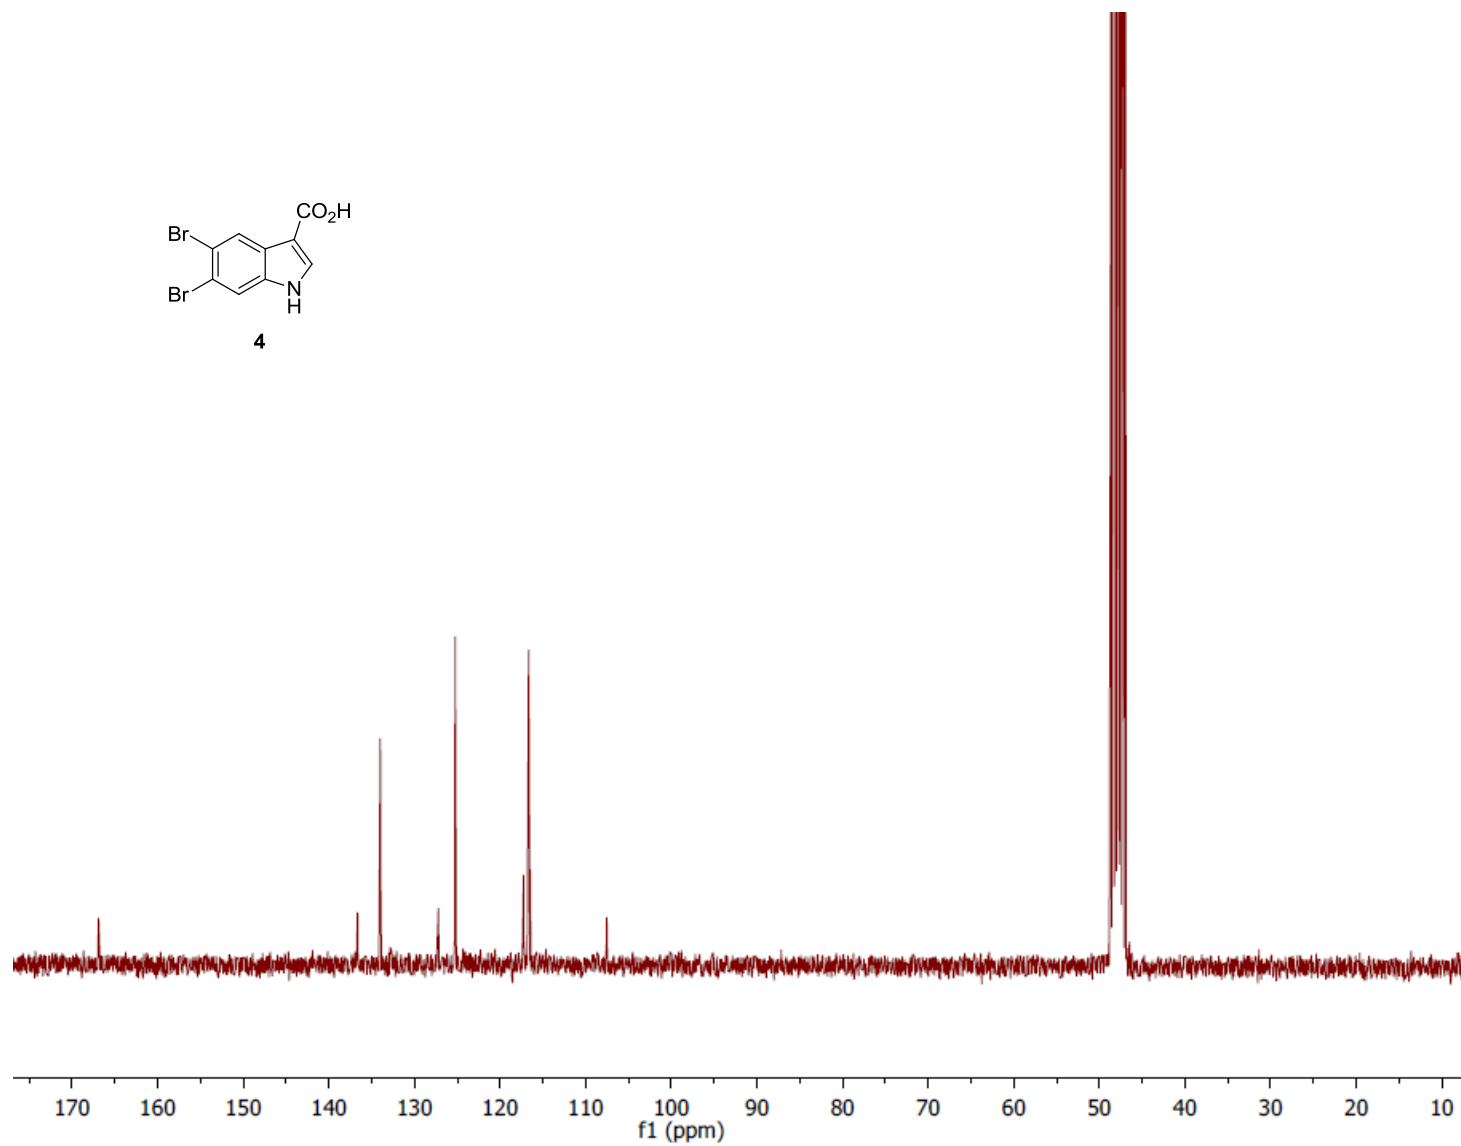



**Figure S15.**  $^1\text{H}$  NMR spectrum of 5,6-dibromo-1*H*-indole (**5**) (300 MHz,  $\text{CDCl}_3$ ).

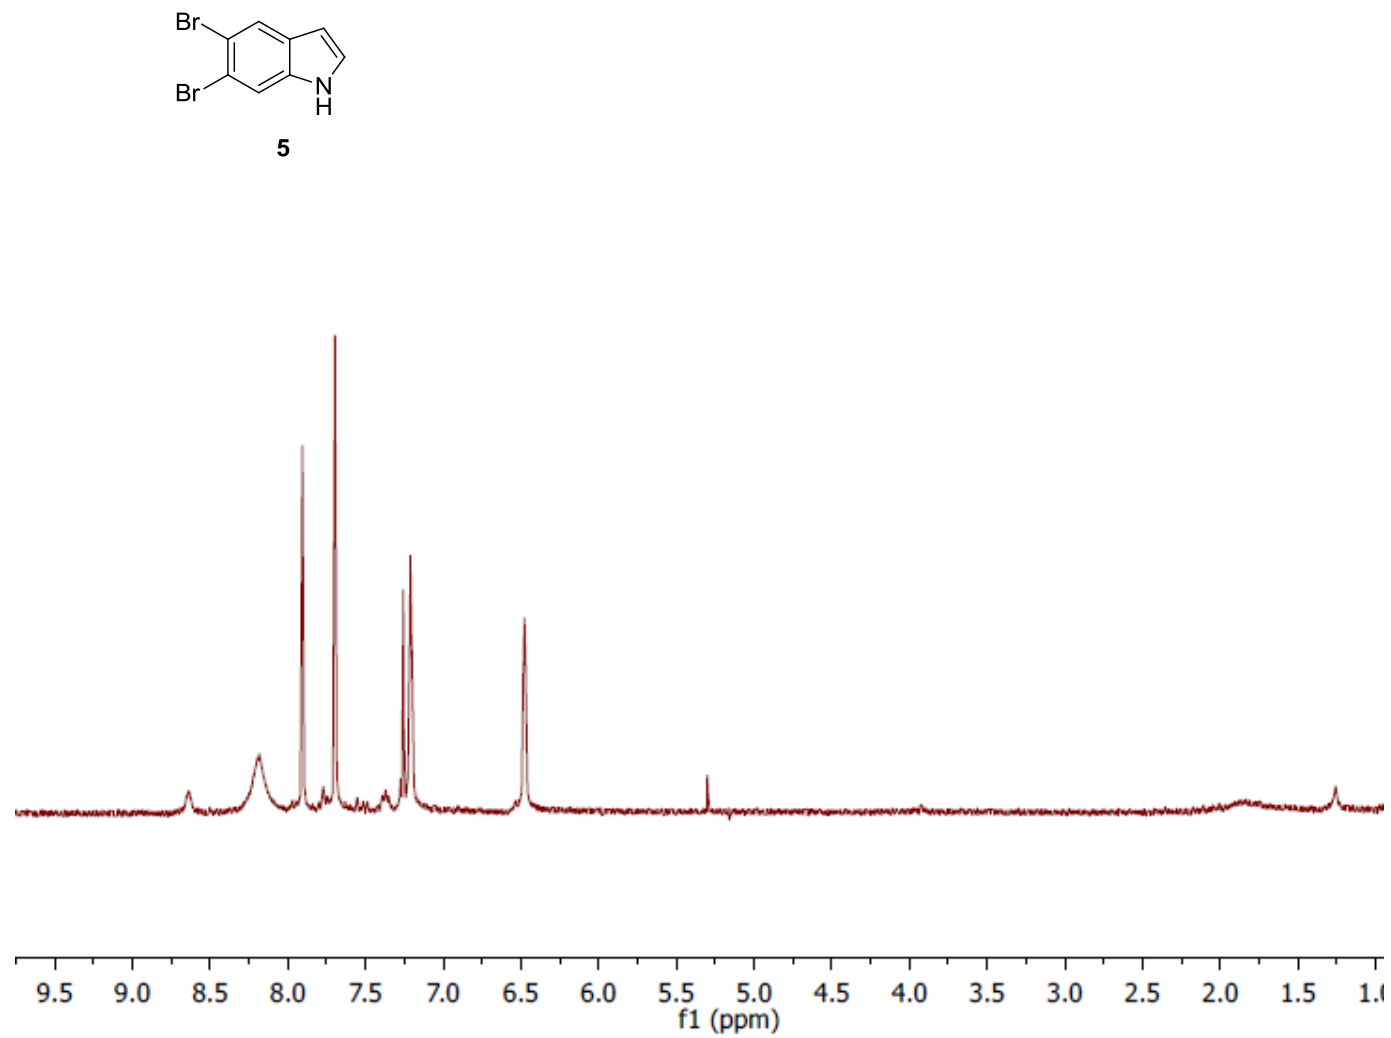

**Figure S16.**  $^{13}\text{C}$  NMR spectrum of 5,6-dibromo-1*H*-indole (**5**) (75 MHz,  $\text{CDCl}_3$ ).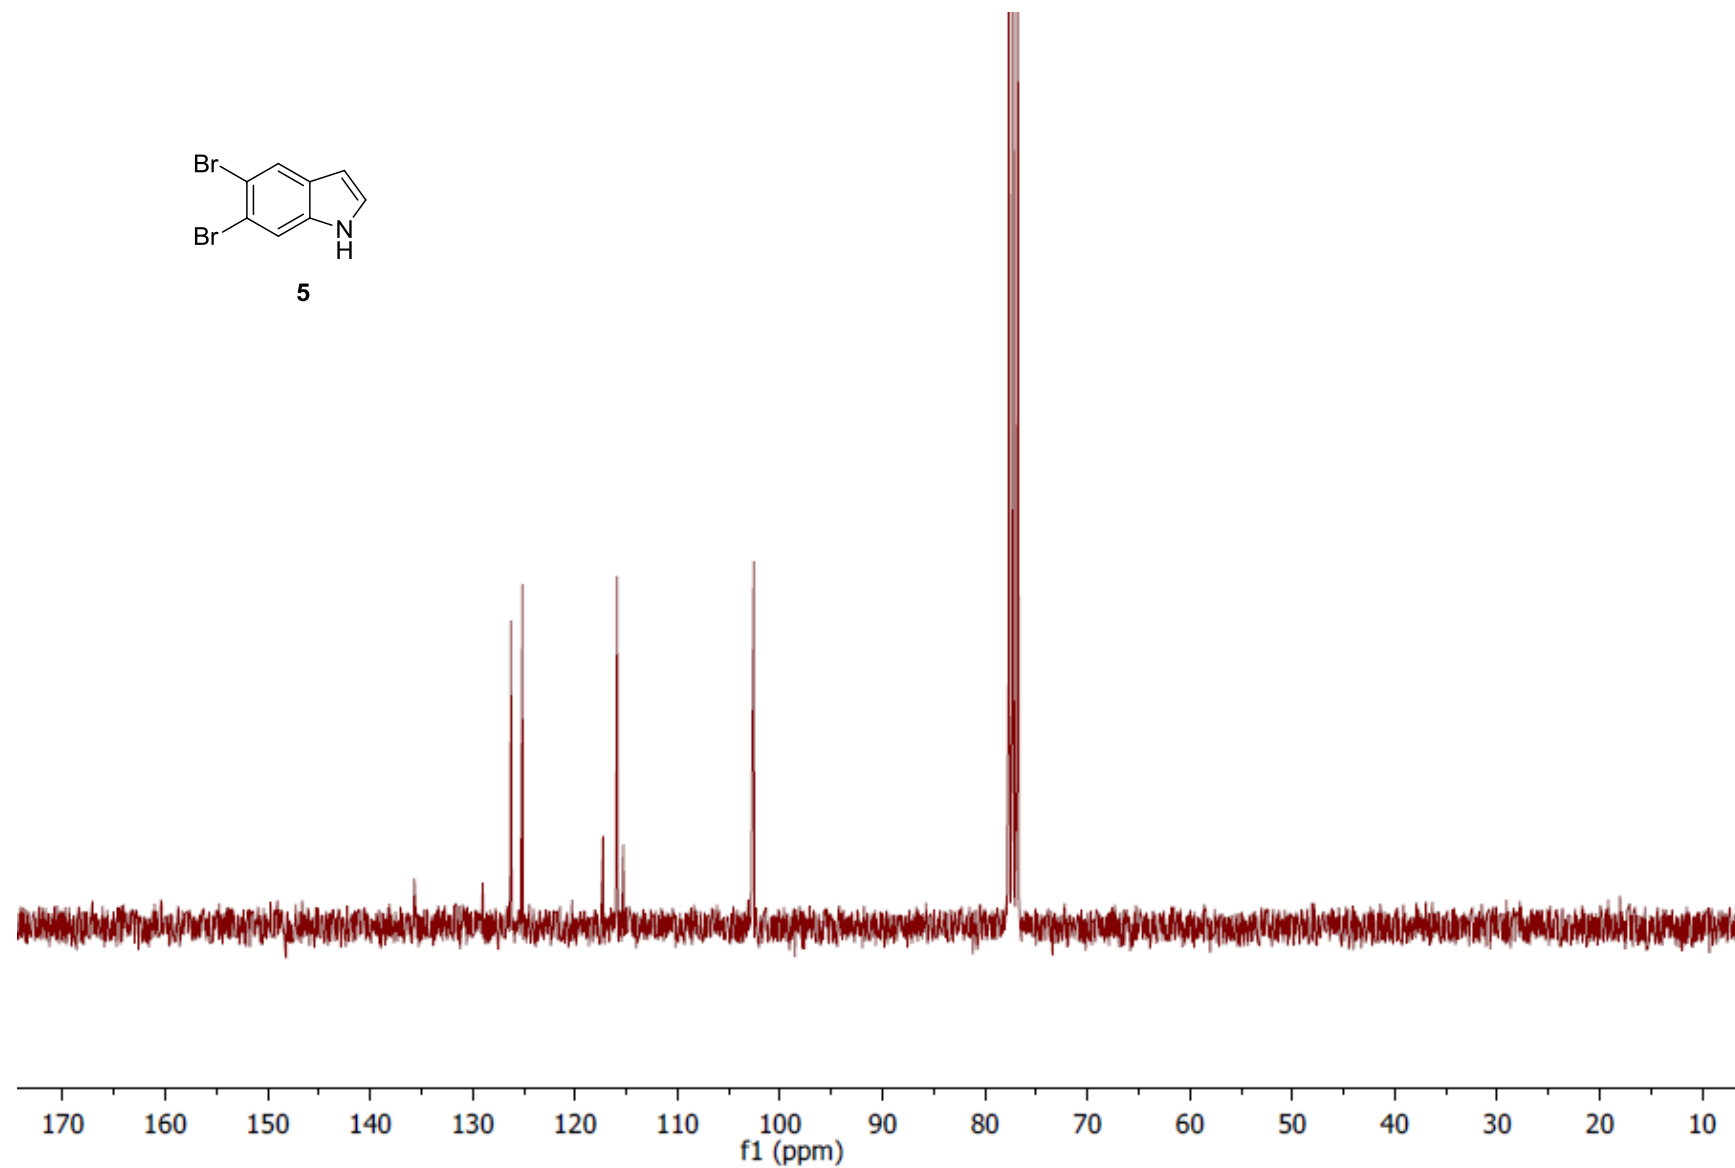

**Figure S17.**  $^1\text{H}$  NMR spectrum of 5,6-dibromo-1*H*-indole-3-carbaldehyde (**6**) (300 MHz,  $\text{DMSO-}d_6$ ).

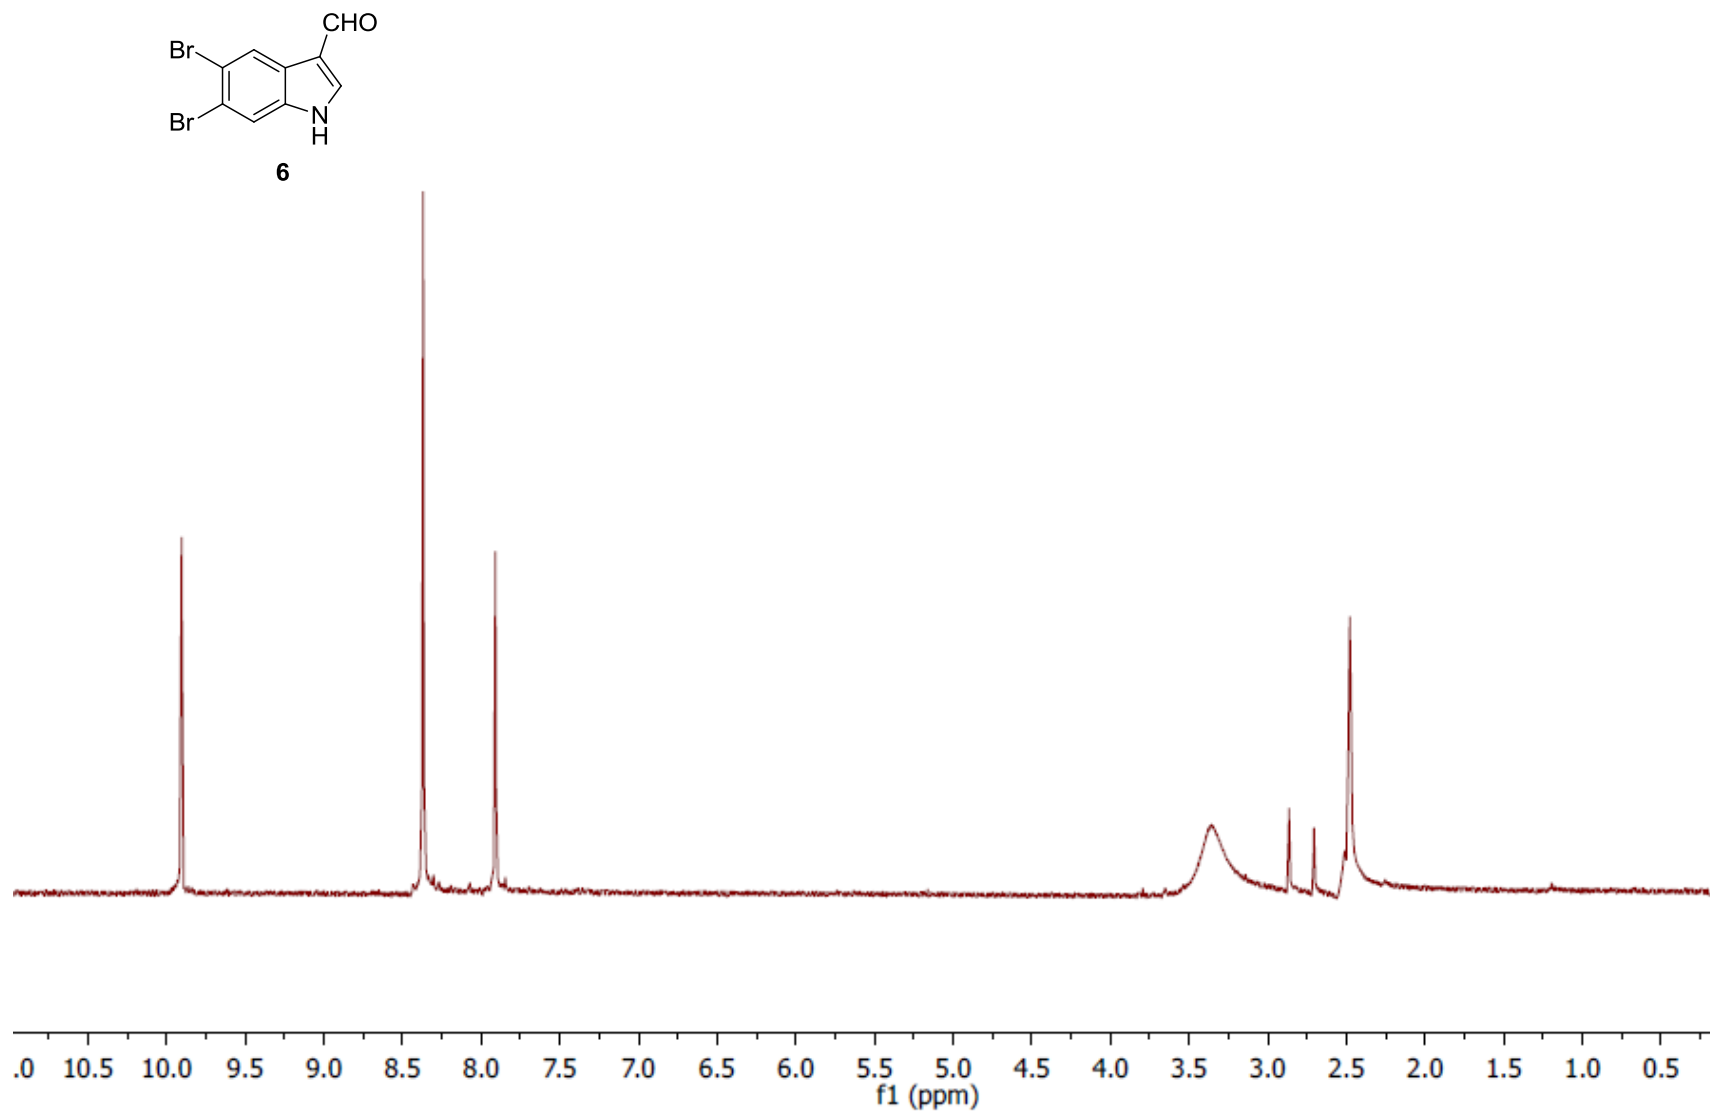

**Figure S18.**  $^{13}\text{C}$  NMR spectrum of 5,6-dibromo-1*H*-indole-3-carbaldehyde (**6**) (75 MHz,  $\text{DMSO-}d_6$ ).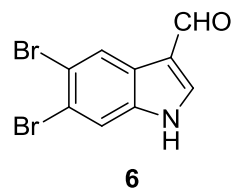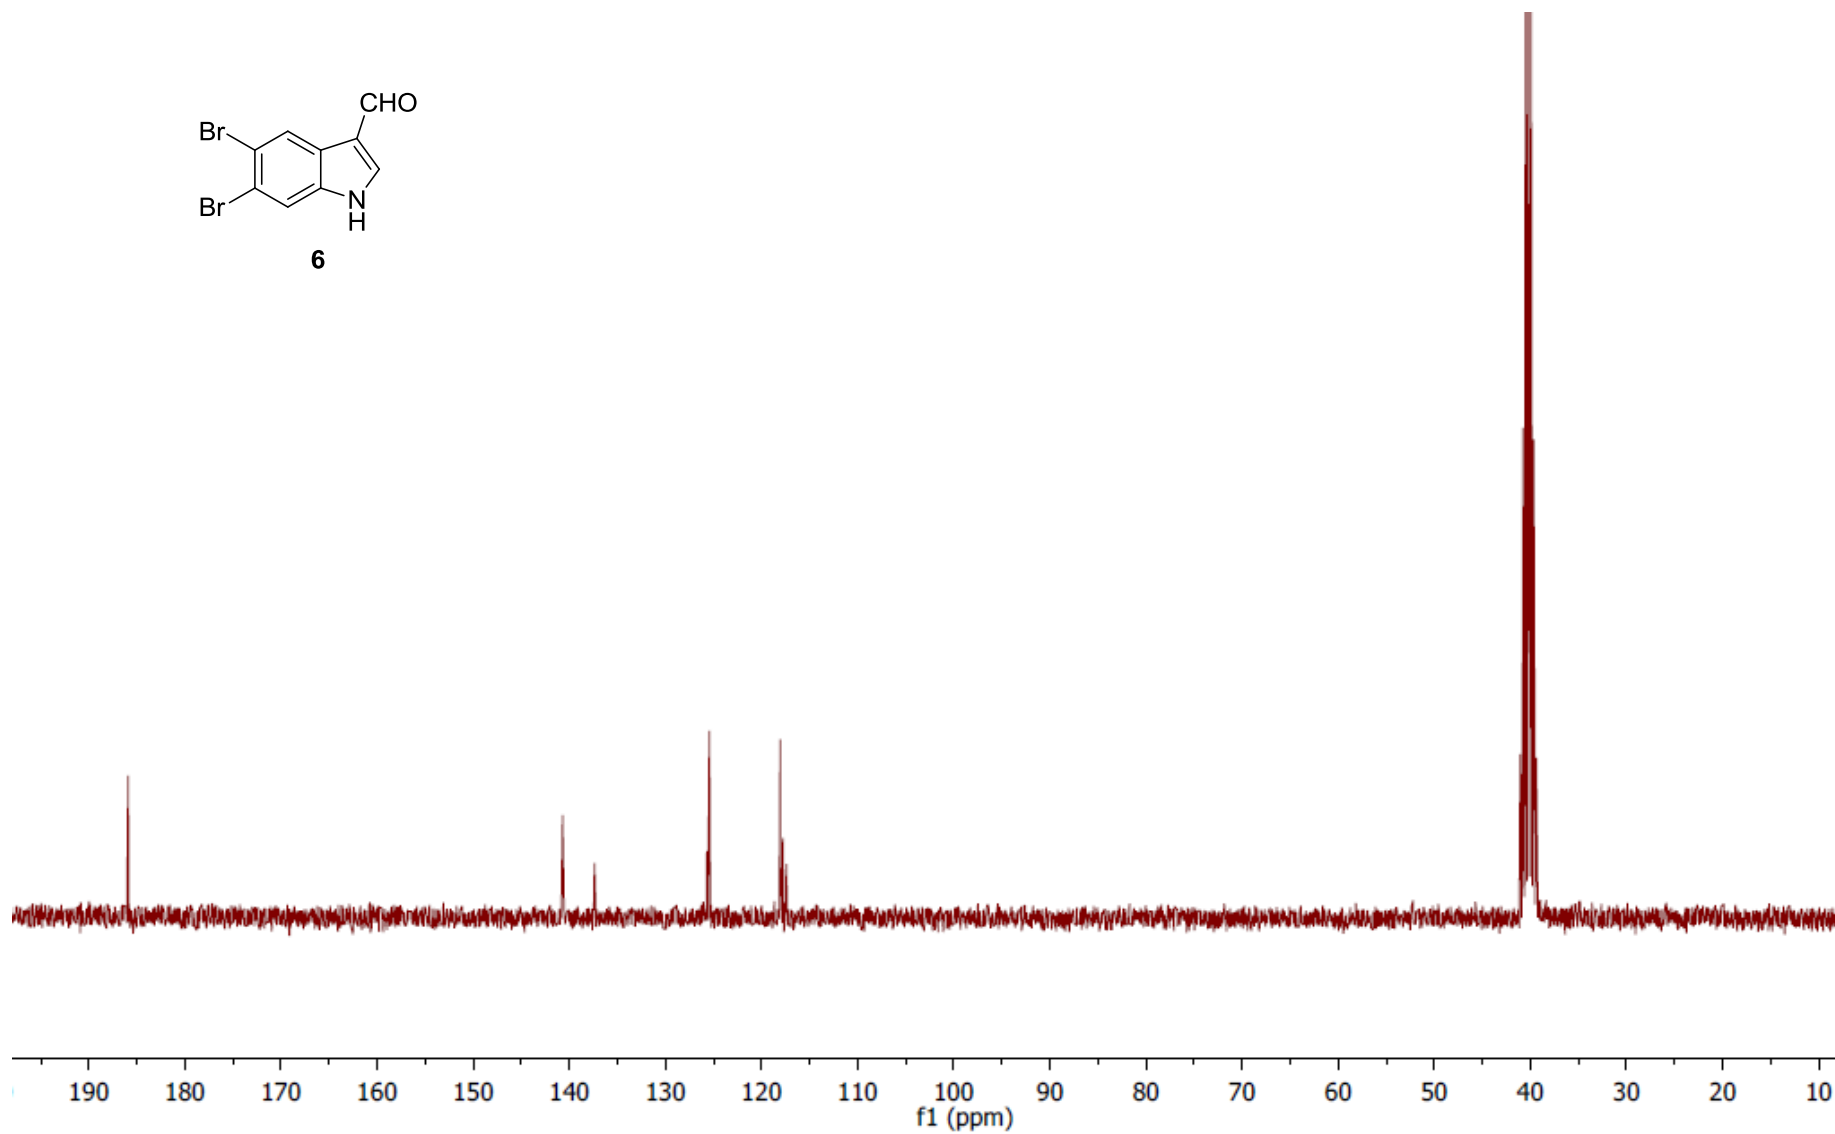

**Figure S19.**  $^1\text{H}$  NMR spectrum of *tert*-butyl 5,6-dibromo-3-formyl-1*H*-indole-1-carboxylate (**7**) (300 MHz,  $\text{CDCl}_3$ ).

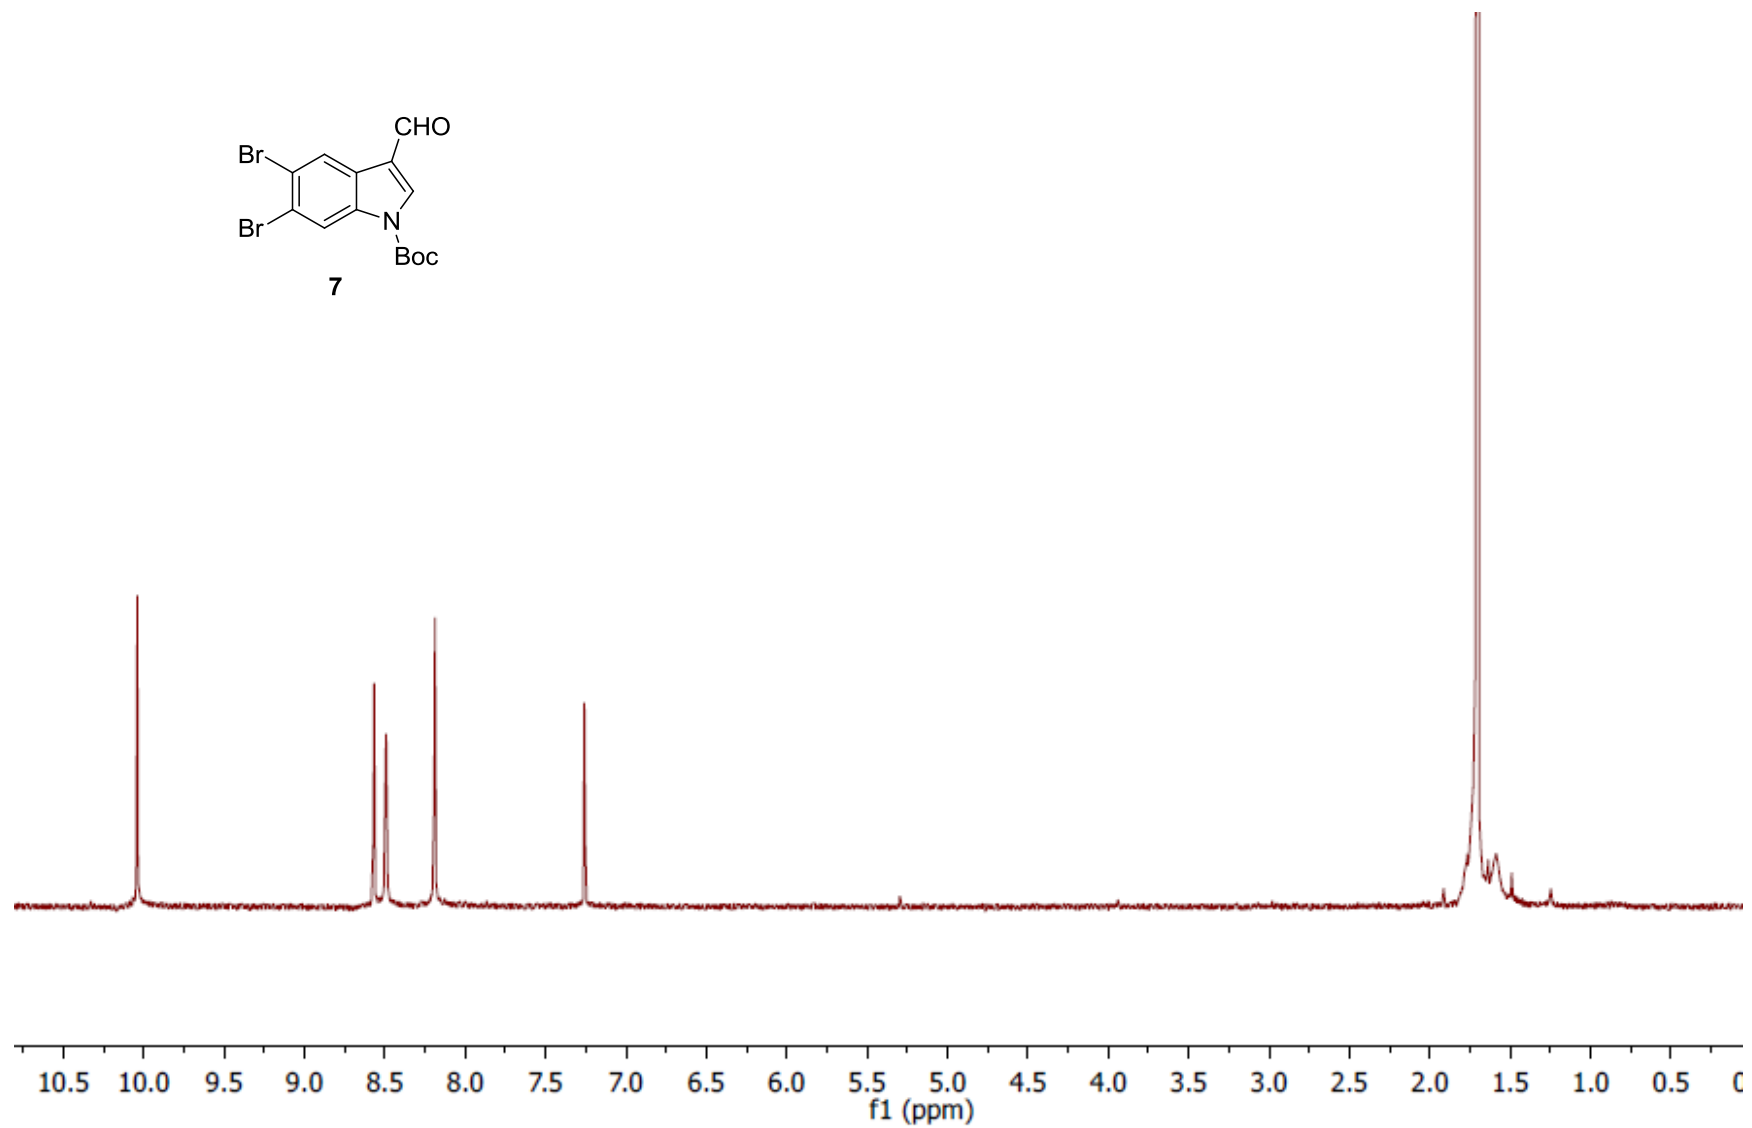

**Figure S20.**  $^{13}\text{C}$  NMR spectrum of *tert*-butyl 5,6-dibromo-3-formyl-1*H*-indole-1-carboxylate (**7**) (75 MHz,  $\text{CDCl}_3$ ).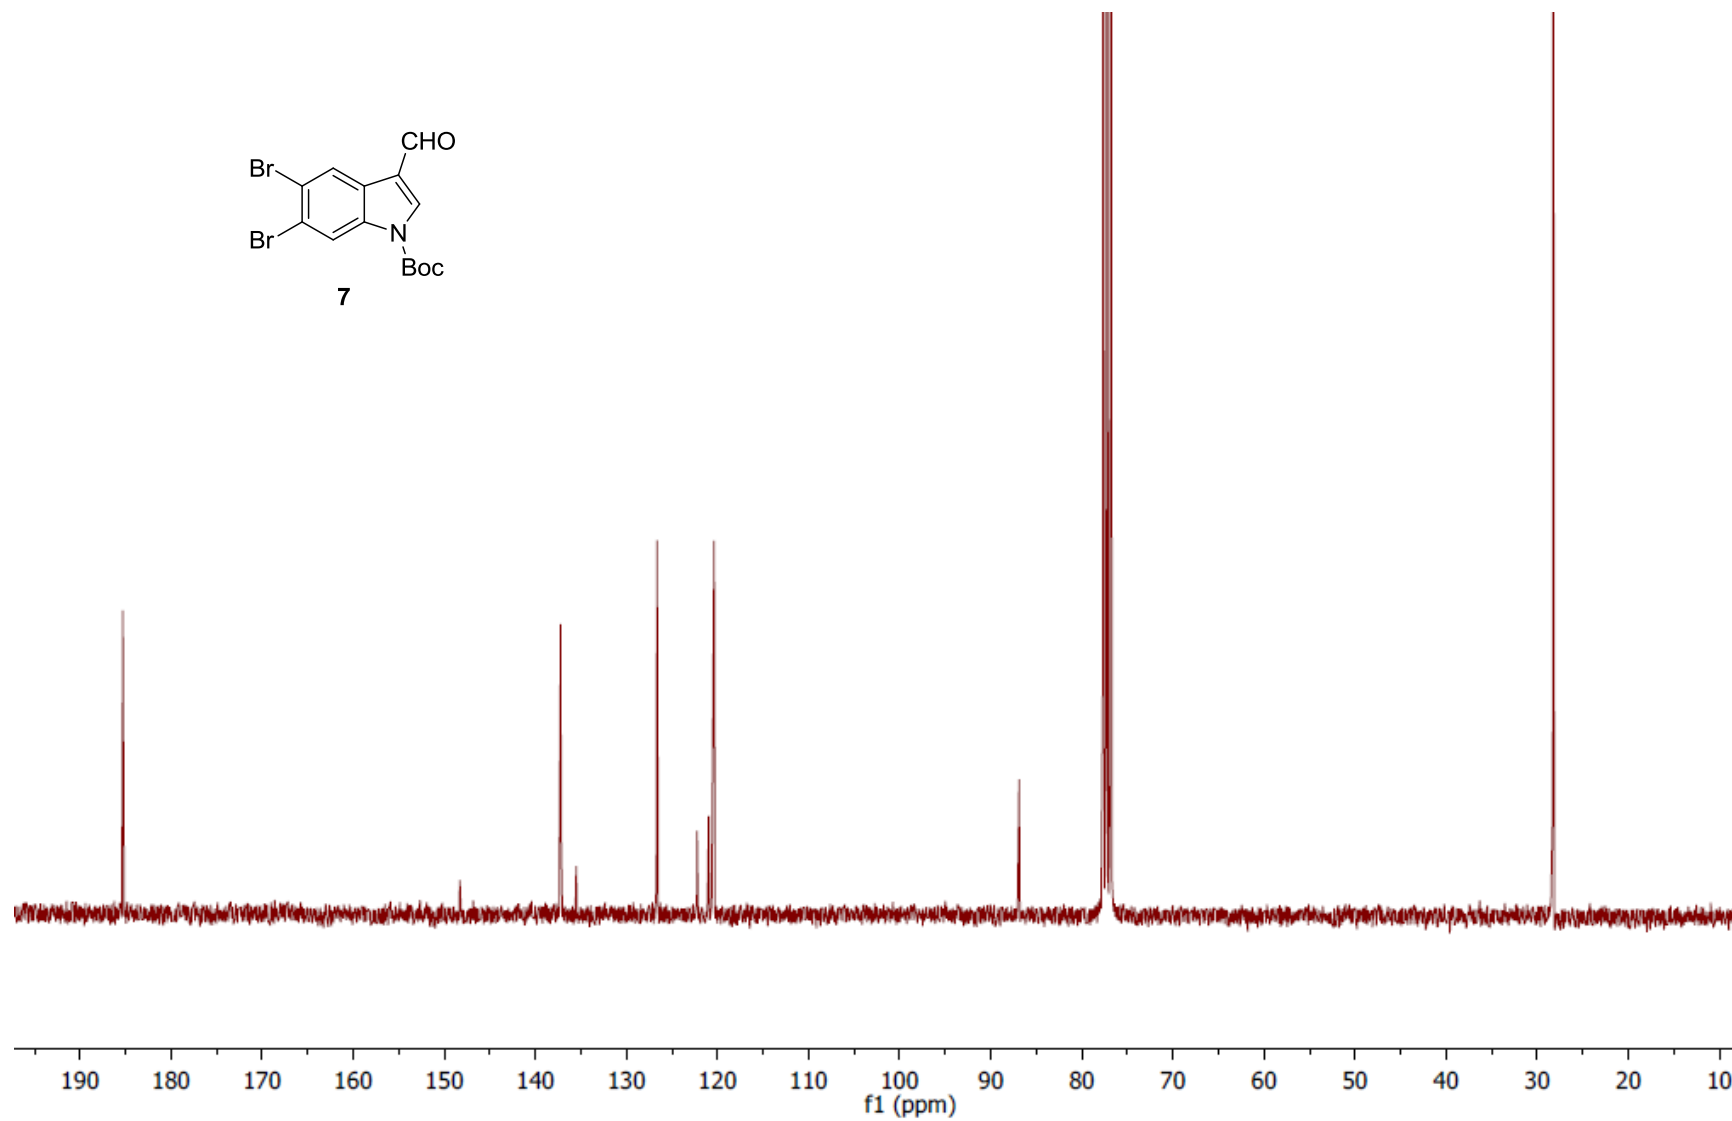

**Figure S21.**  $^1\text{H}$  NMR spectrum of (*Z*)-*tert*-butyl 5,6-dibromo-3-(2-iodovinyl)-1*H*-indole-1-carboxylate (**8**) (300 MHz,  $\text{CDCl}_3$ ).

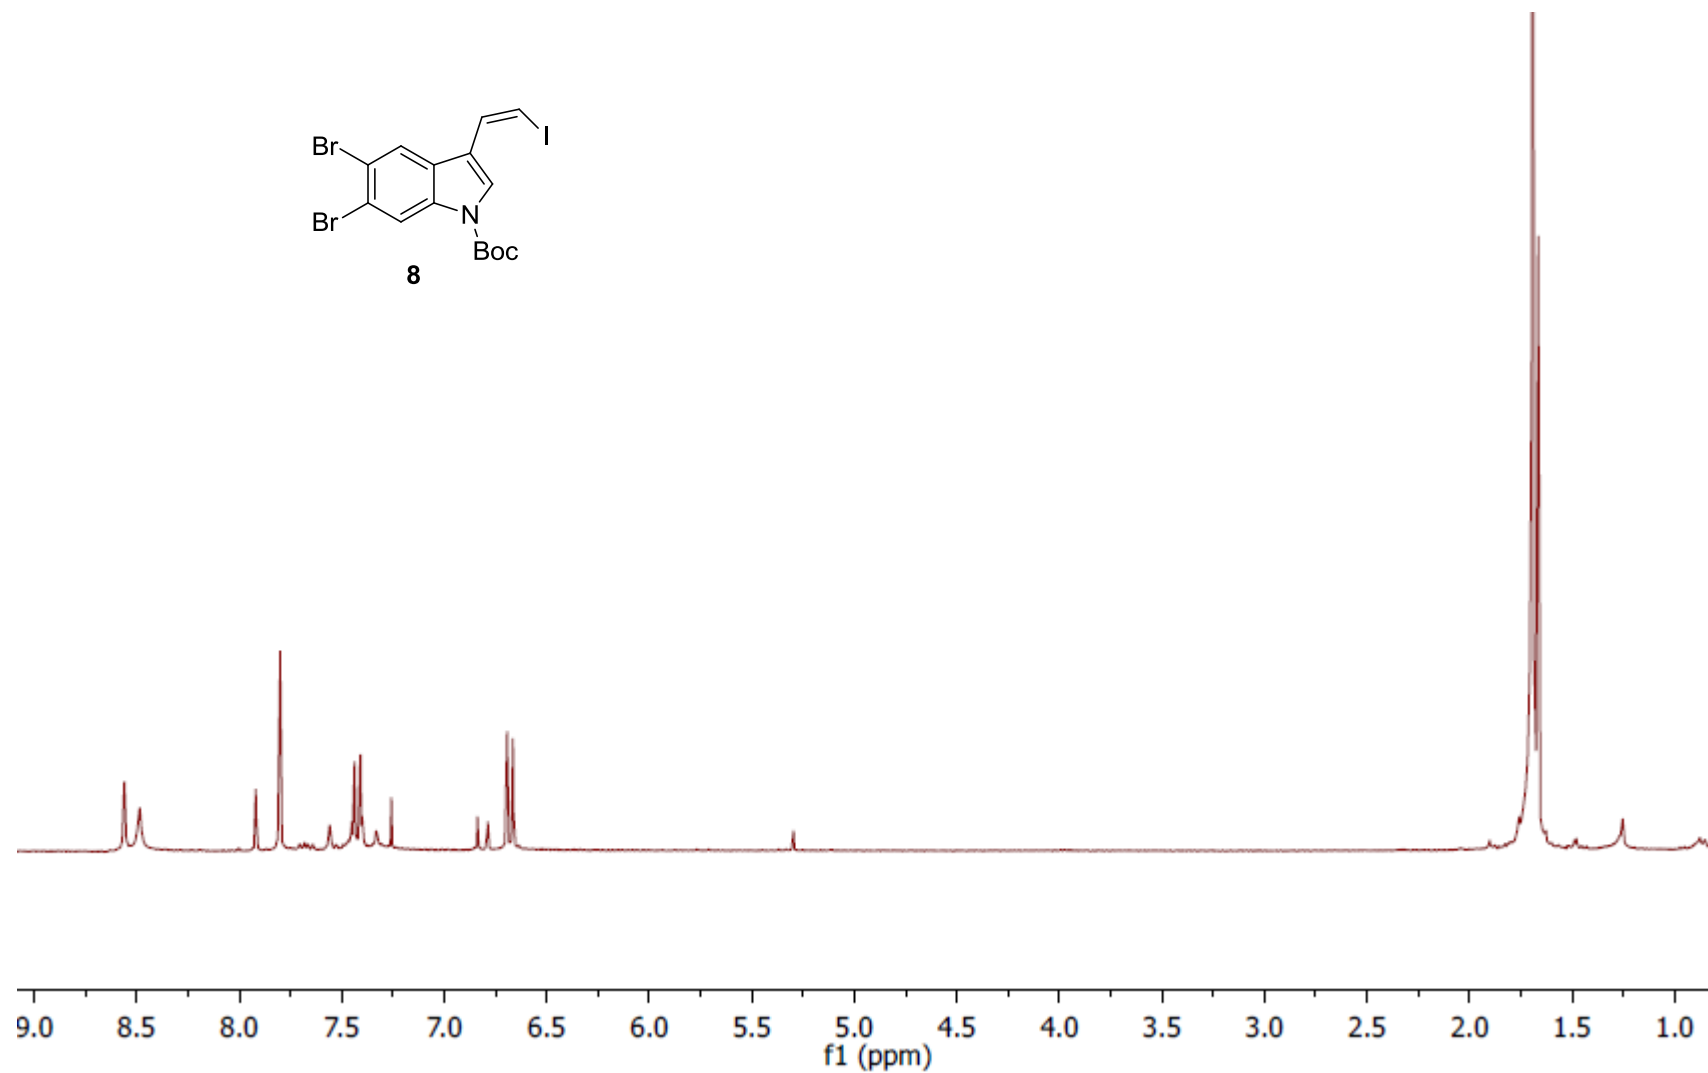

**Figure S22.**  $^{13}\text{C}$  NMR spectrum of (*Z*)-*tert*-butyl 5,6-dibromo-3-(2-iodovinyl)-1*H*-indole-1-carboxylate (**8**) (75 MHz,  $\text{CDCl}_3$ ).

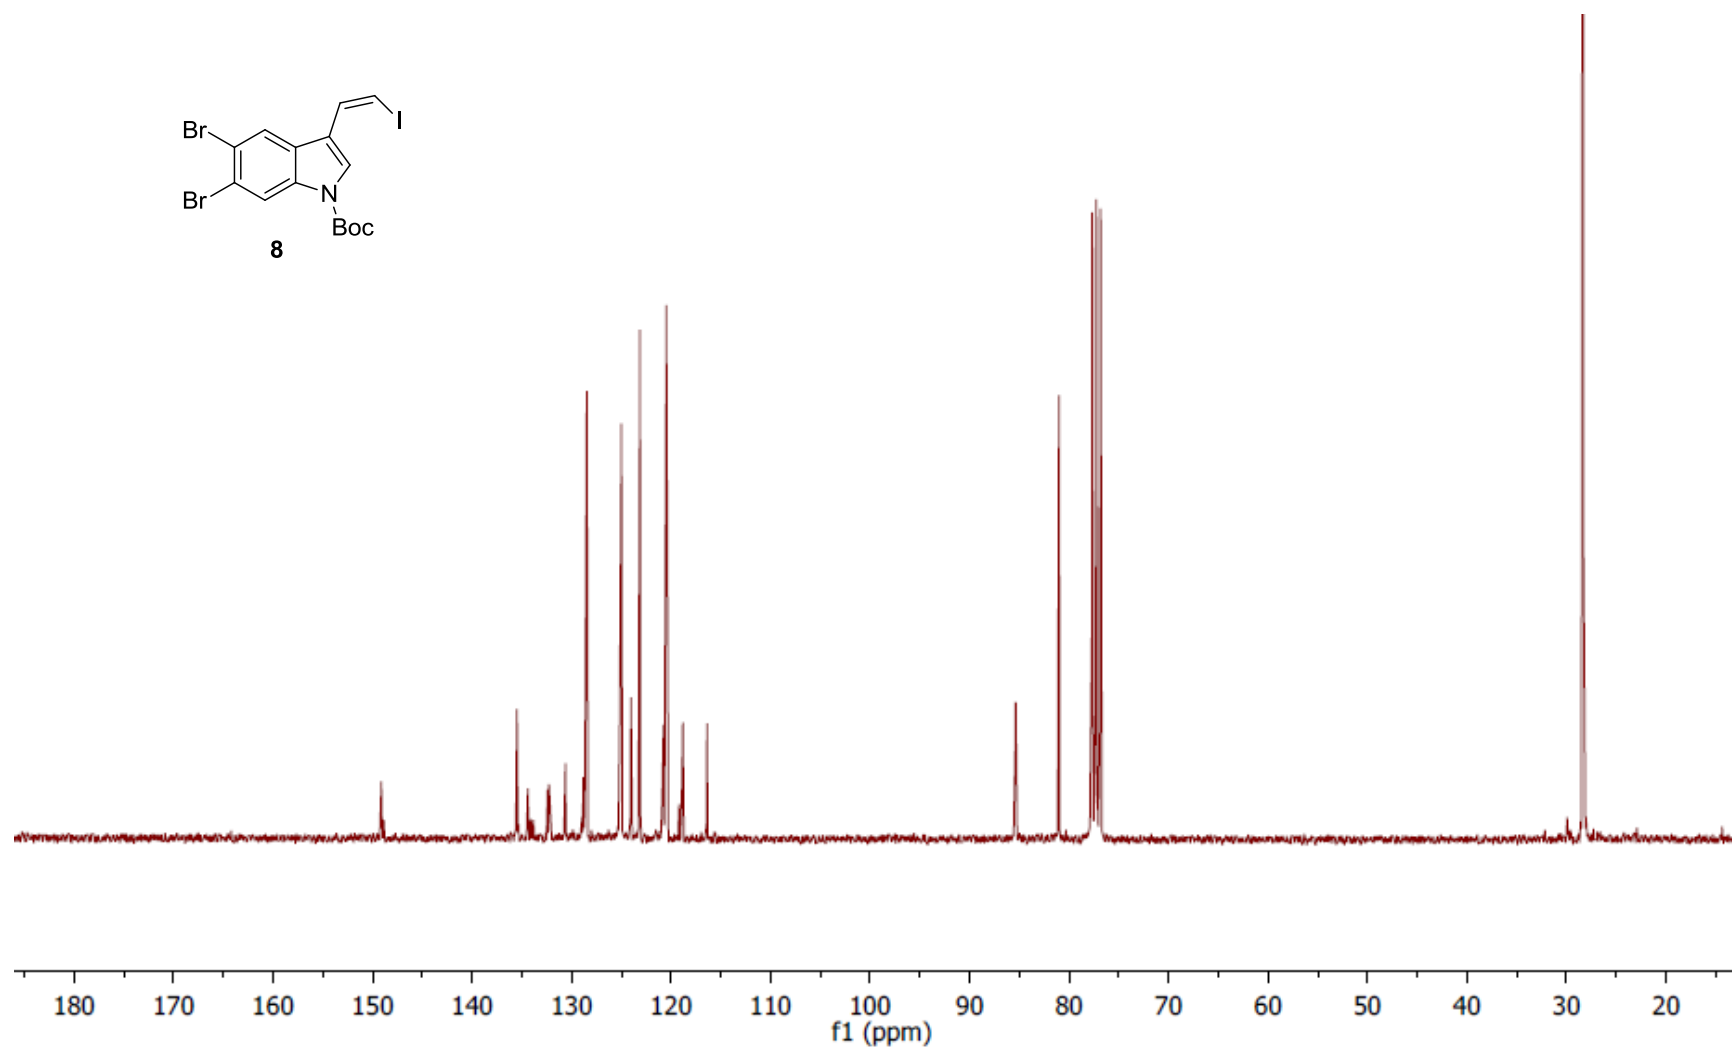



**Figure S23.**  $^1\text{H}$  NMR spectrum of (*R,Z*)-*tert*-butyl 3-(2-(2-(((allyloxy)carbonyl)amino)-3-(tritylthio)propanamido)vinyl)-5,6-dibromo-1*H*-indole-1-carboxylate (**Z-10**) (300 MHz,  $\text{CDCl}_3$ ).

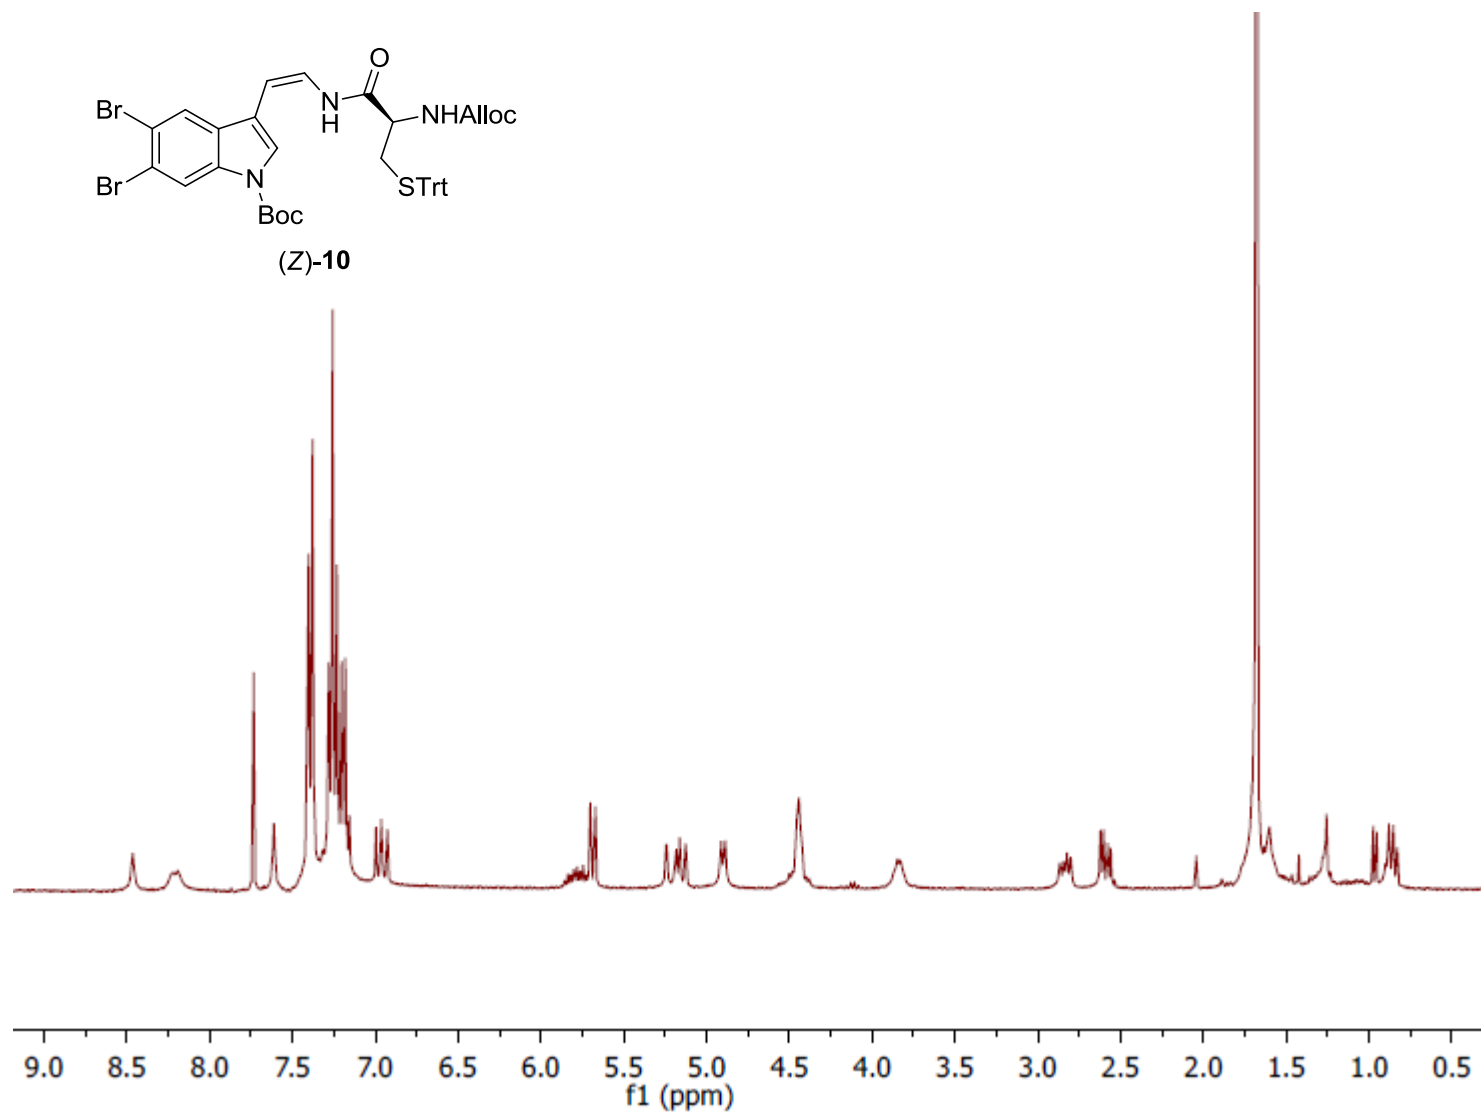

**Figure S24.**  $^{13}\text{C}$  NMR spectrum of (*R,Z*)-*tert*-butyl 3-(2-(2-(((allyloxy)carbonyl)amino)-3-(tritylthio)propanamido)vinyl)-5,6-dibromo-1-*H*-indole-1-carboxylate (**Z-10**) (75 MHz,  $\text{CDCl}_3$ ).

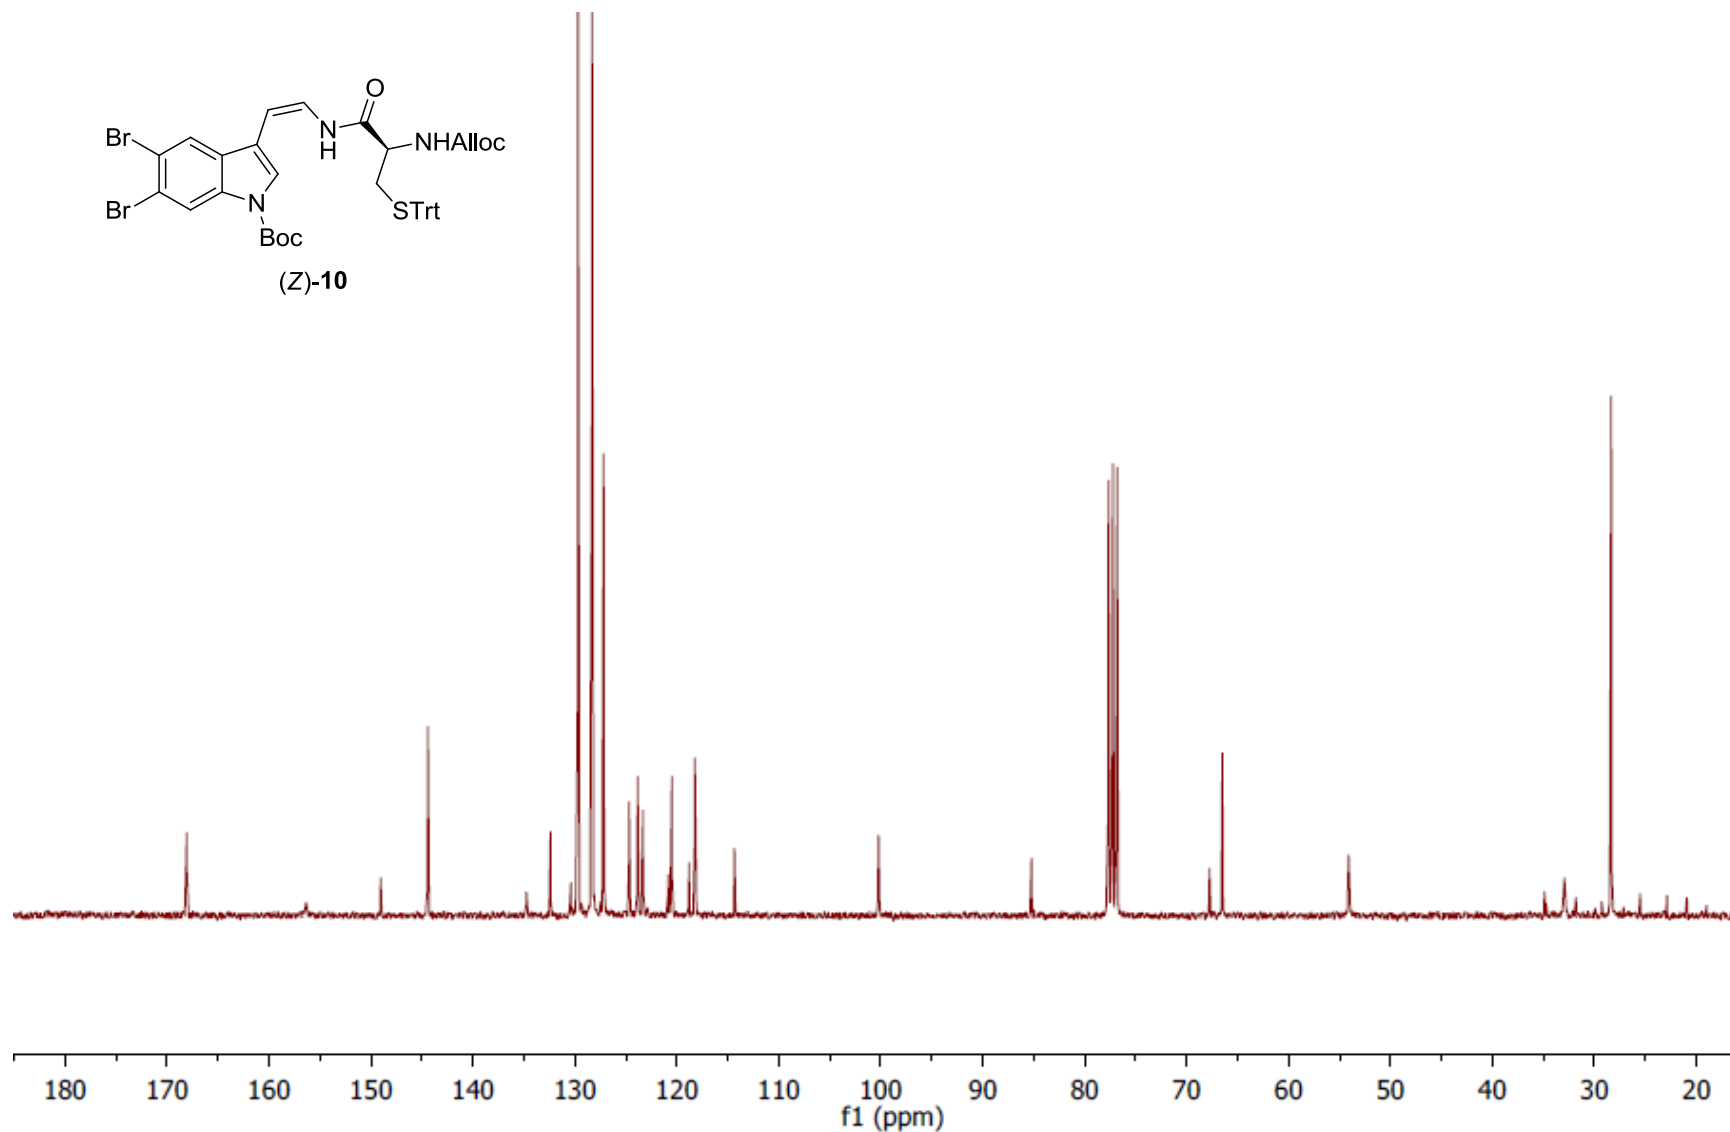

**Figure S25.**  $^1\text{H}$  NMR spectrum of (*R,E*)-*tert*-butyl 3-(2-(2-(((allyloxy)carbonyl)amino)-3-(tritylthio)propanamido)vinyl)-5,6-dibromo-1*H*-indole-1-carboxylate (*E*-10) (300 MHz,  $\text{CDCl}_3$ ).

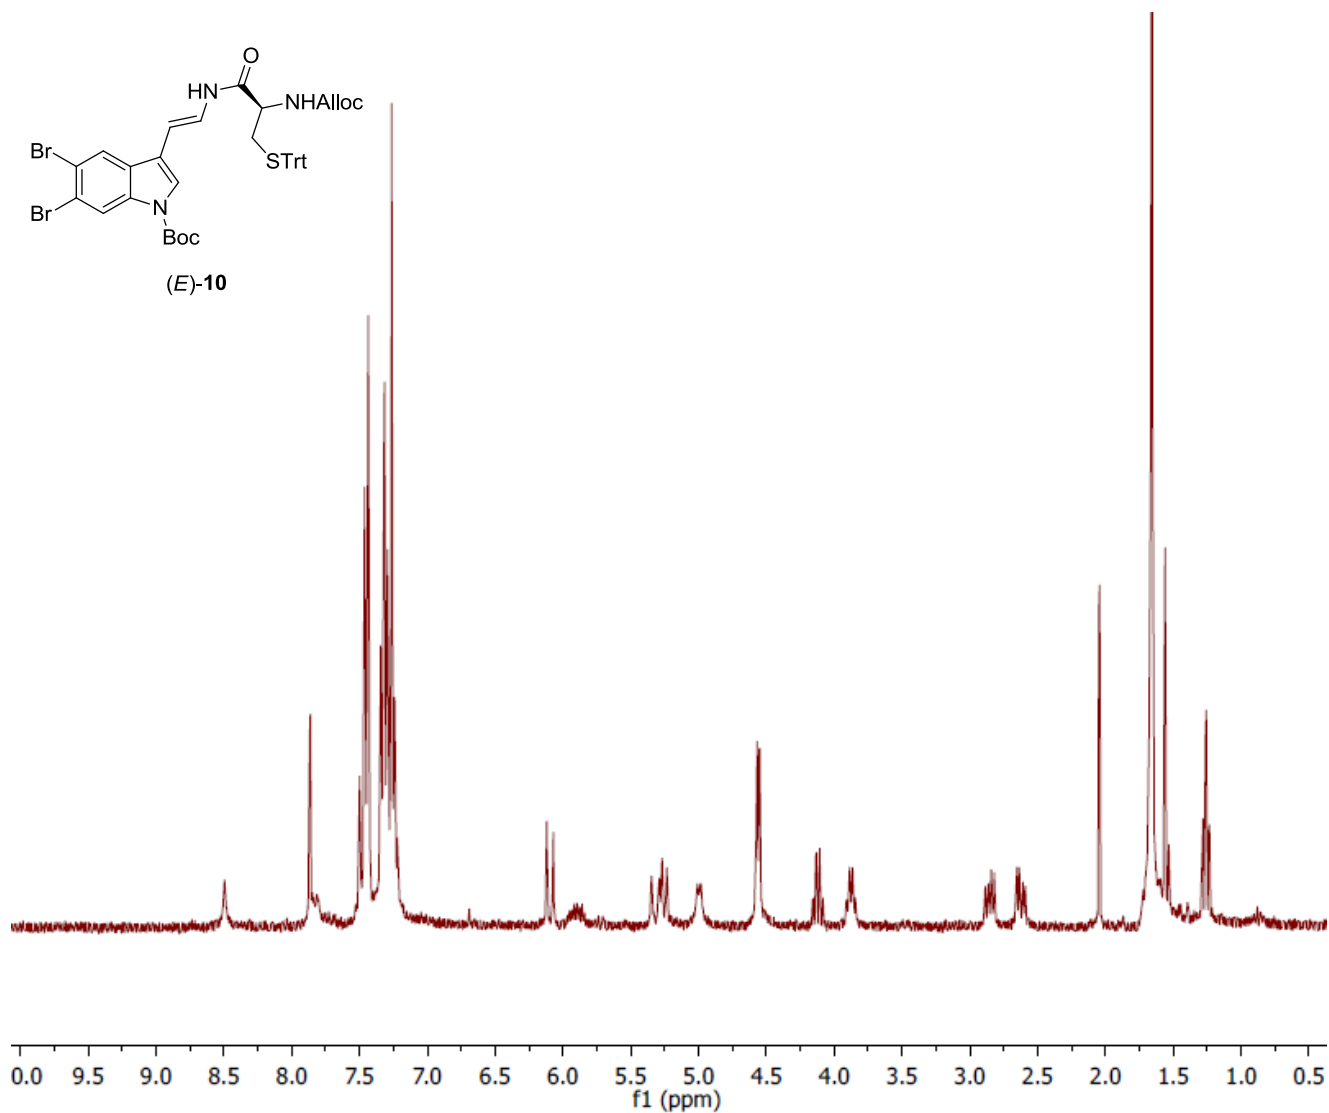

**Figure S26.**  $^{13}\text{C}$  NMR spectrum of (*R,E*)-*tert*-butyl 3-(2-(2-(((allyloxy)carbonyl)amino)-3-(tritylthio)propanamido)vinyl)-5,6-dibromo-1*H*-indole-1-carboxylate (*E*-10) (75 MHz,  $\text{CDCl}_3$ ).

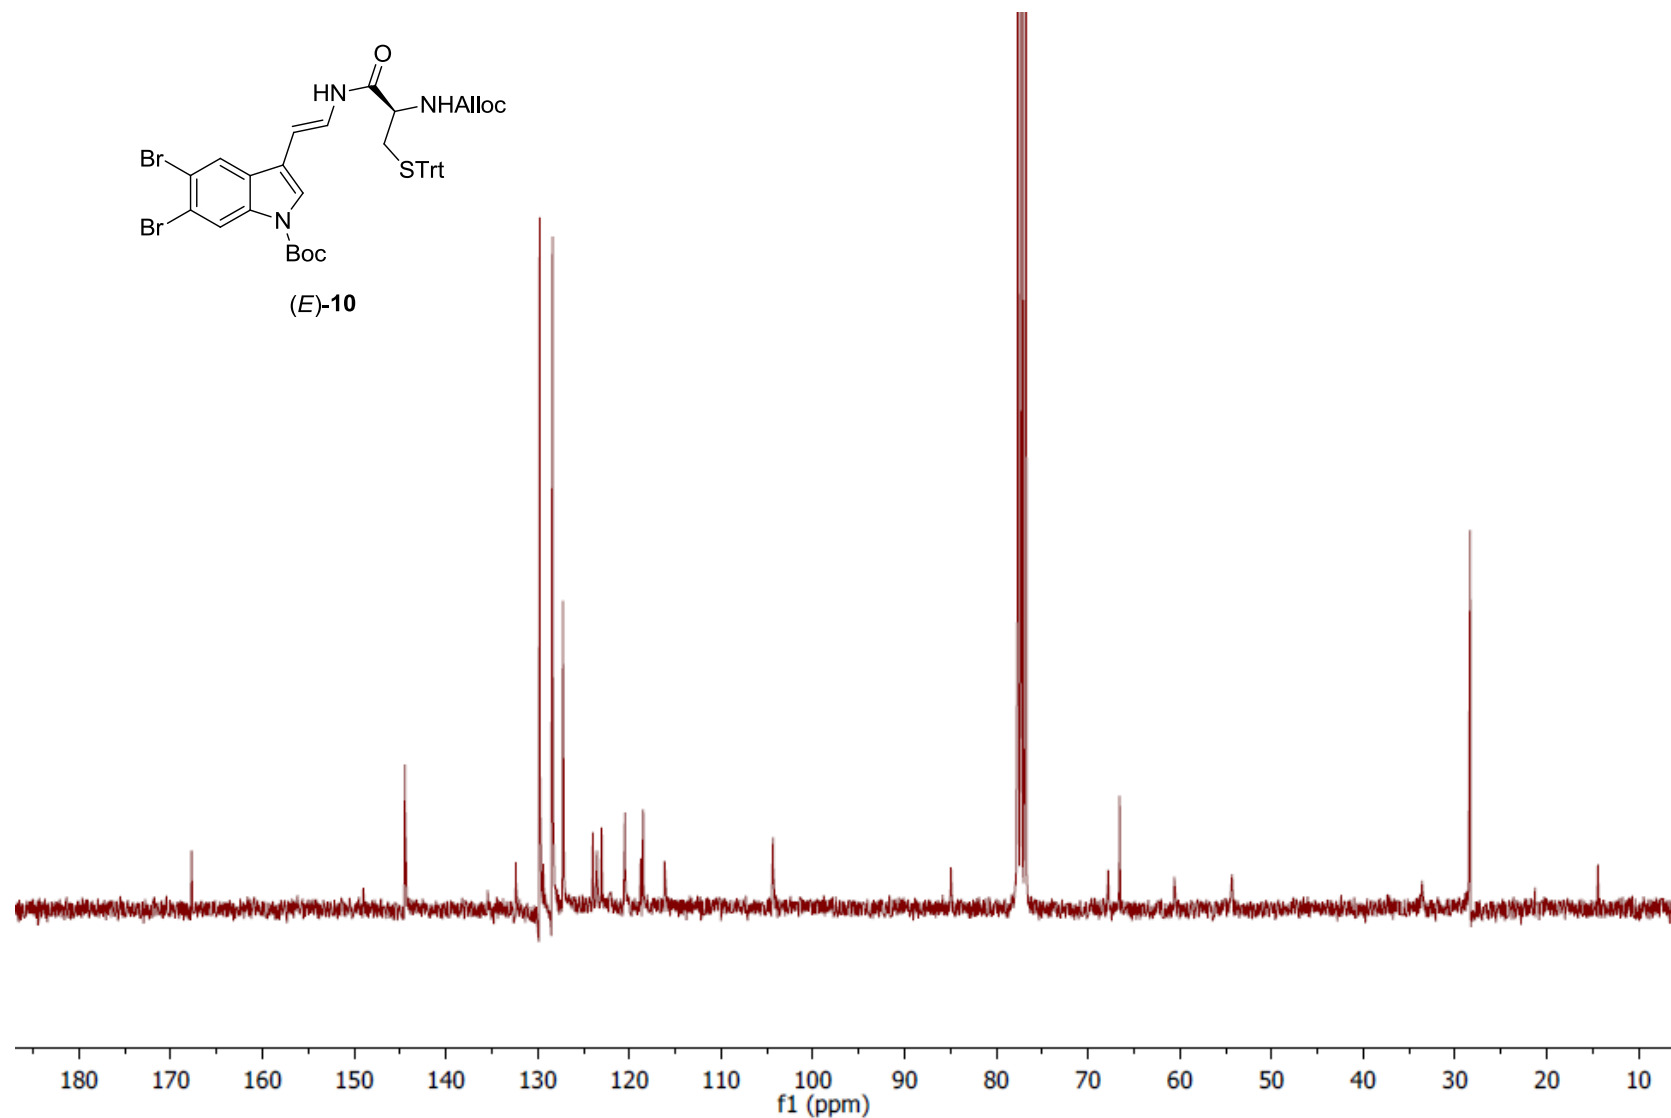

**Figure S27.**  $^1\text{H}$  NMR spectrum of (*R,Z*)-*tert*-butyl 3-(2-(2-amino-3-(tritylthio)propanamido)vinyl)-5,6-dibromo-1*H*-indole-1-carboxylate (**Z-11**) (300 MHz,  $\text{CDCl}_3$ ).

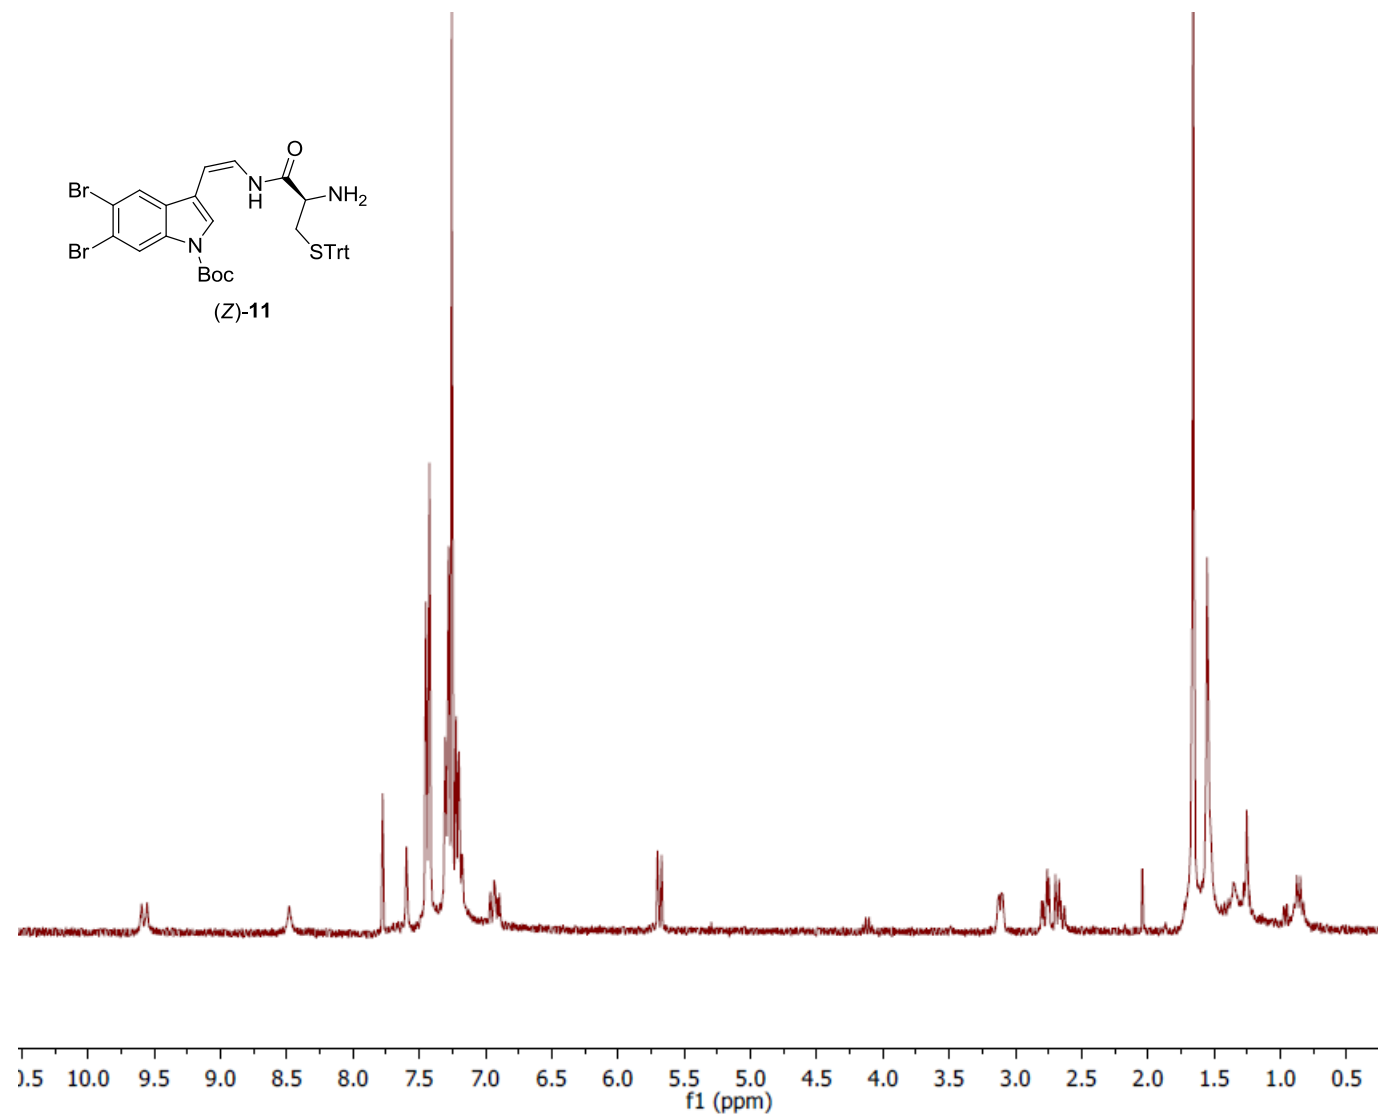

**Figure S28.**  $^{13}\text{C}$  NMR spectrum of (*R,Z*)-*tert*-butyl 3-(2-(2-amino-3-(tritylthio)propanamido)vinyl)-5,6-dibromo-1*H*-indole-1-carboxylate (*Z*-11) (75 MHz,  $\text{CDCl}_3$ ).

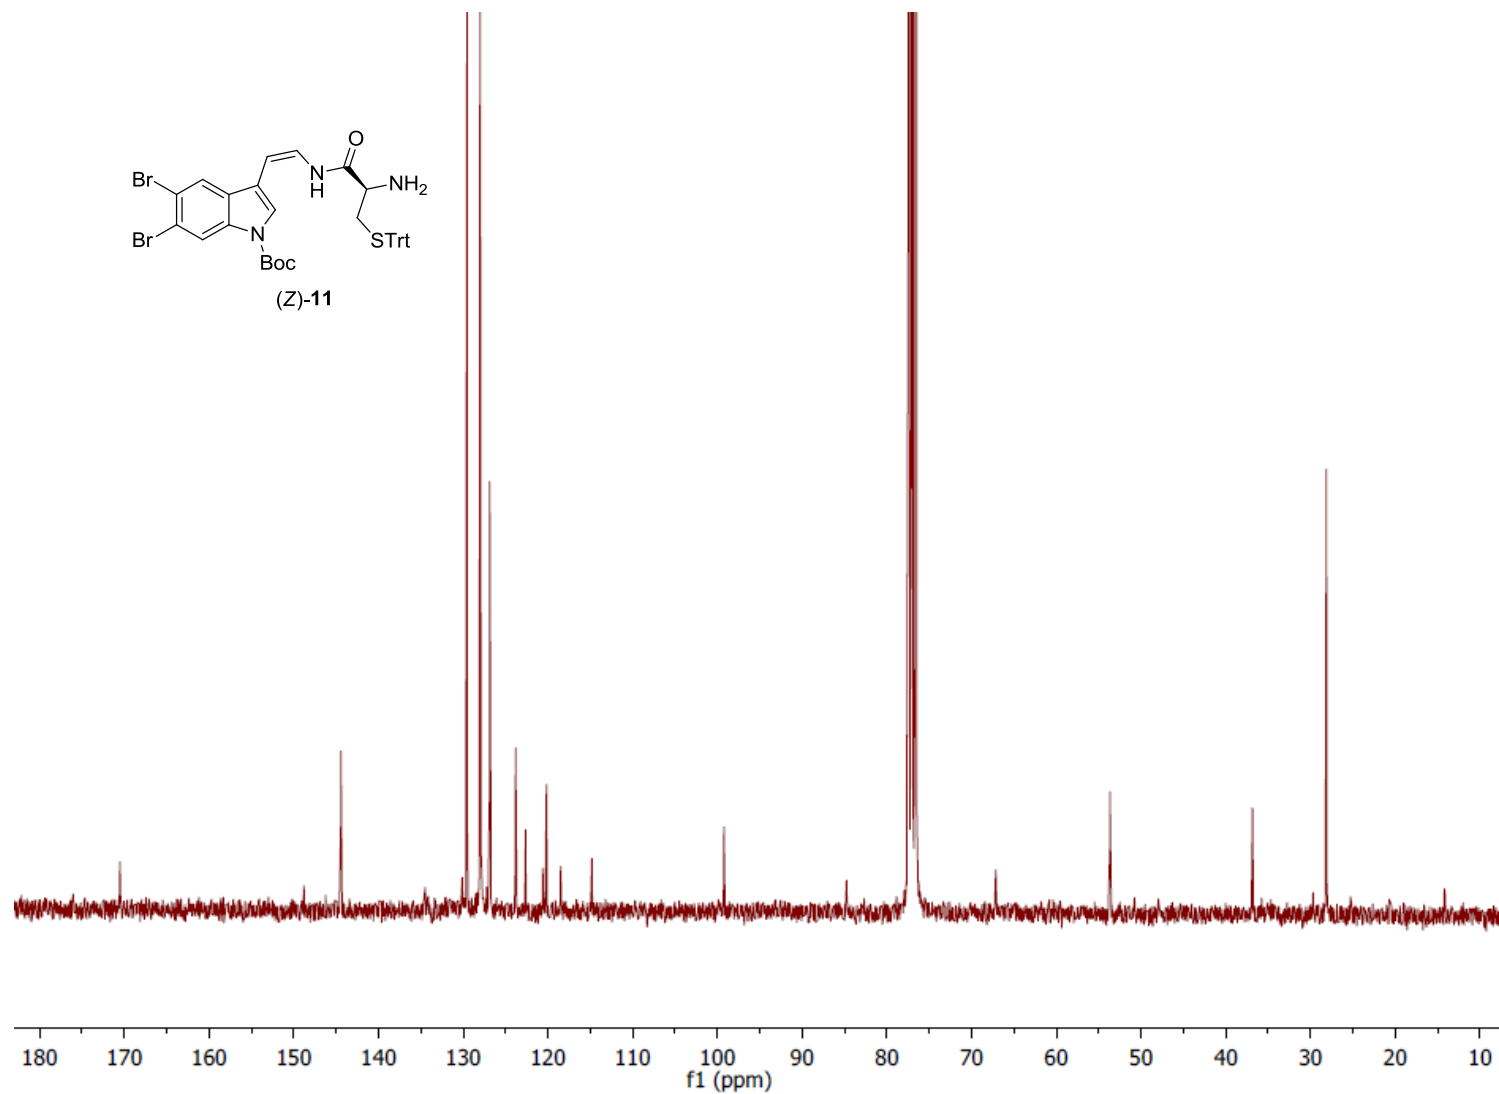

**Figure S29.**  $^1\text{H}$  NMR spectrum of (*R,E*)-*tert*-butyl 3-(2-(2-amino-3-(tritylthio)propanamido)vinyl)-5,6-dibromo-1*H*-indole-1-carboxylate (*E*-11) (300 MHz,  $\text{CDCl}_3$ ).

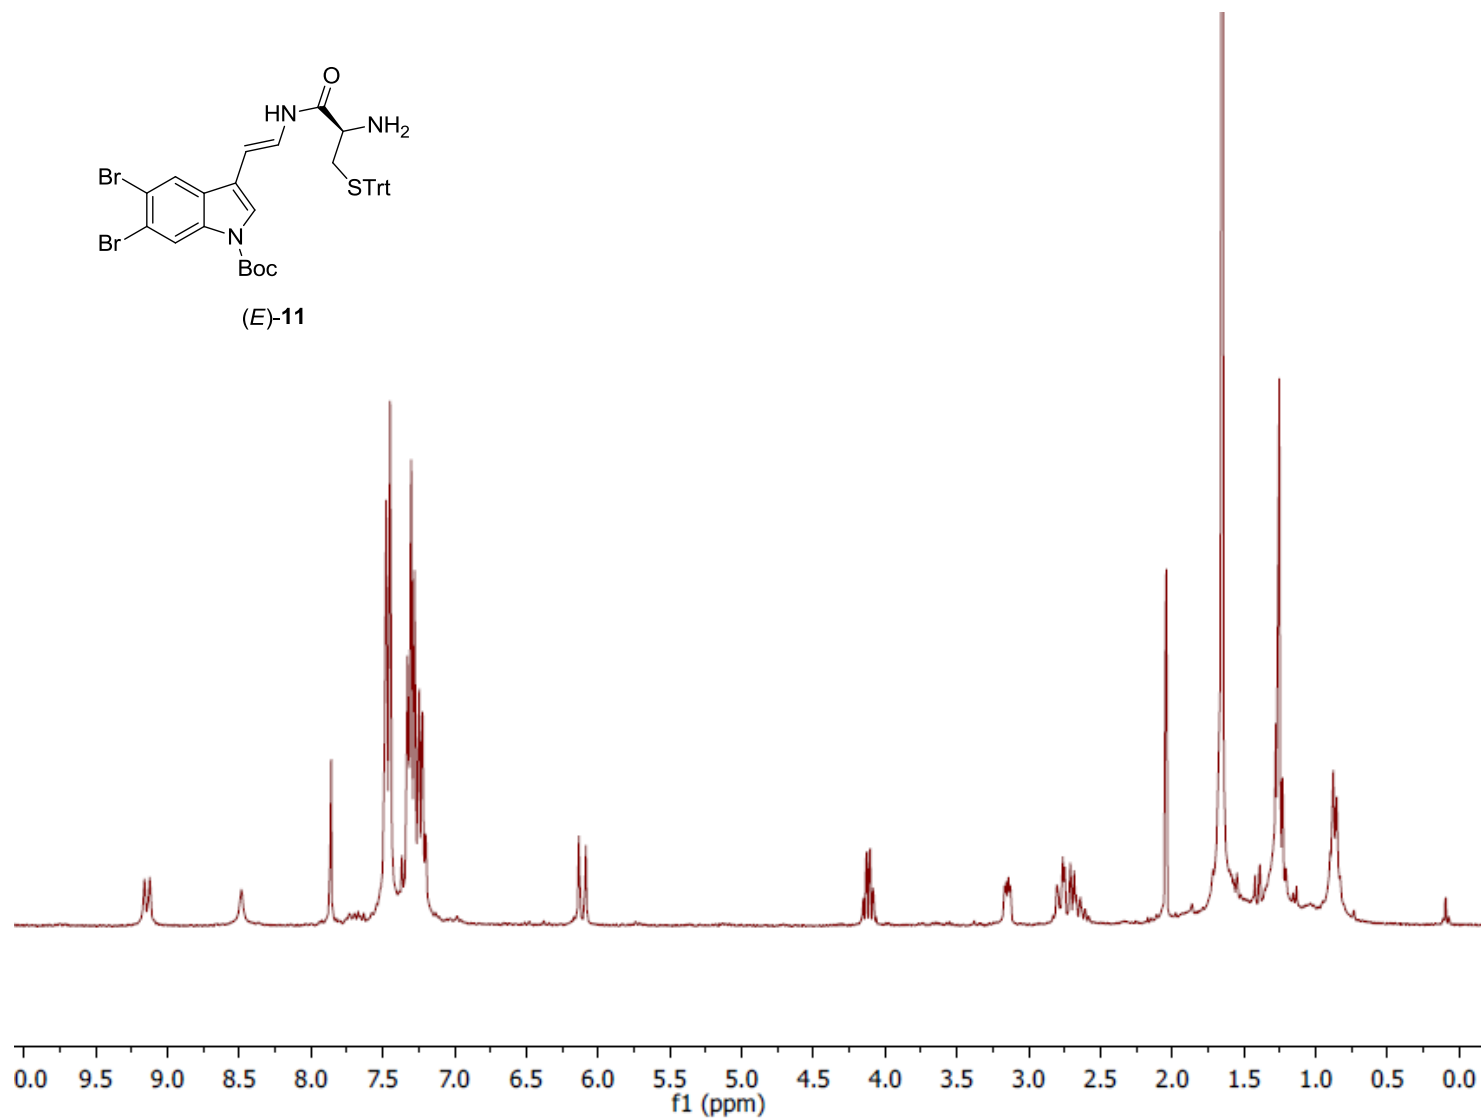

**Figure S30.**  $^{13}\text{C}$  NMR spectrum of (*R,E*)-*tert*-butyl 3-(2-(2-amino-3-(tritylthio)propanamido)vinyl)-5,6-dibromo-1*H*-indole-1-carboxylate (*E*-11) (75 MHz,  $\text{CDCl}_3$ ).

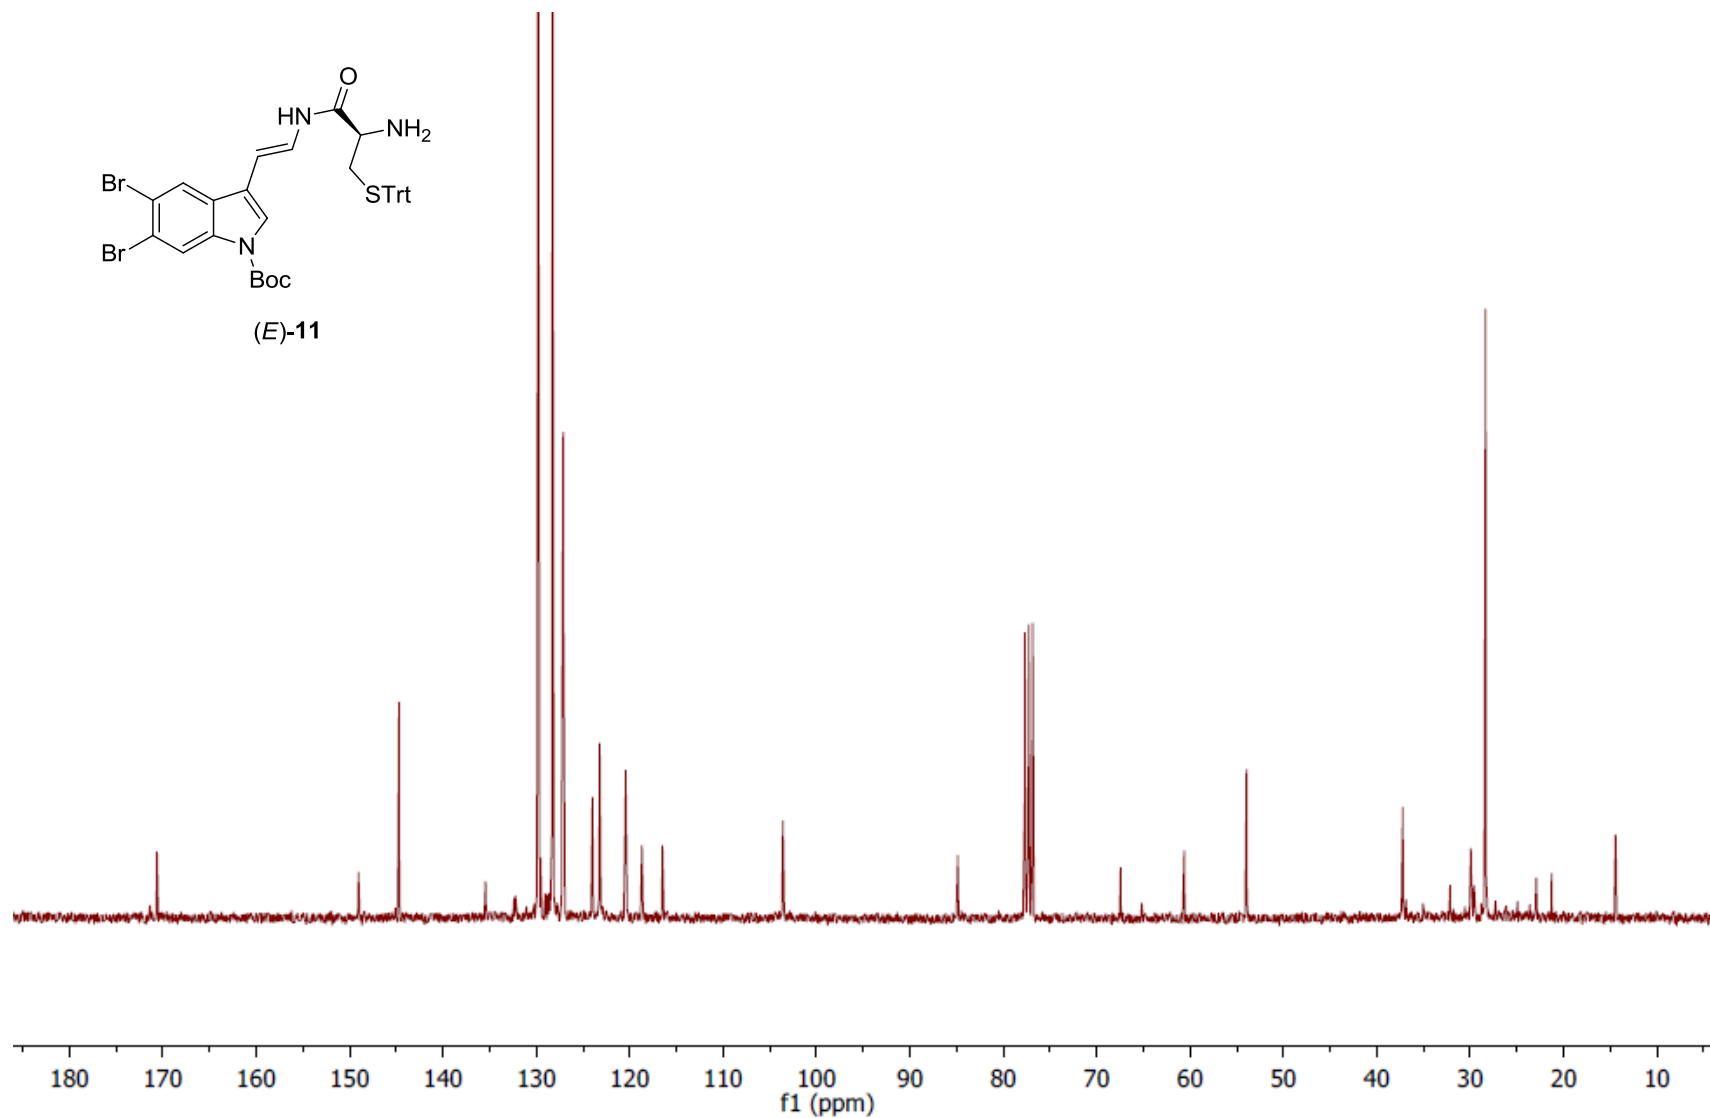



**Figure S31.**  $^1\text{H}$  NMR spectrum of *tert*-butyl 5,6-dibromo-3-((6*R*,9*R*,*Z*)-2,2-dimethyl-4,7,10-trioxo-6,9-bis((tritylthio)methyl)-3-oxa-5,8,11-triazatridec-12-en-13-yl)-1*H*-indole-1-carboxylate (**Z-12**) (300 MHz,  $\text{CDCl}_3$ ).

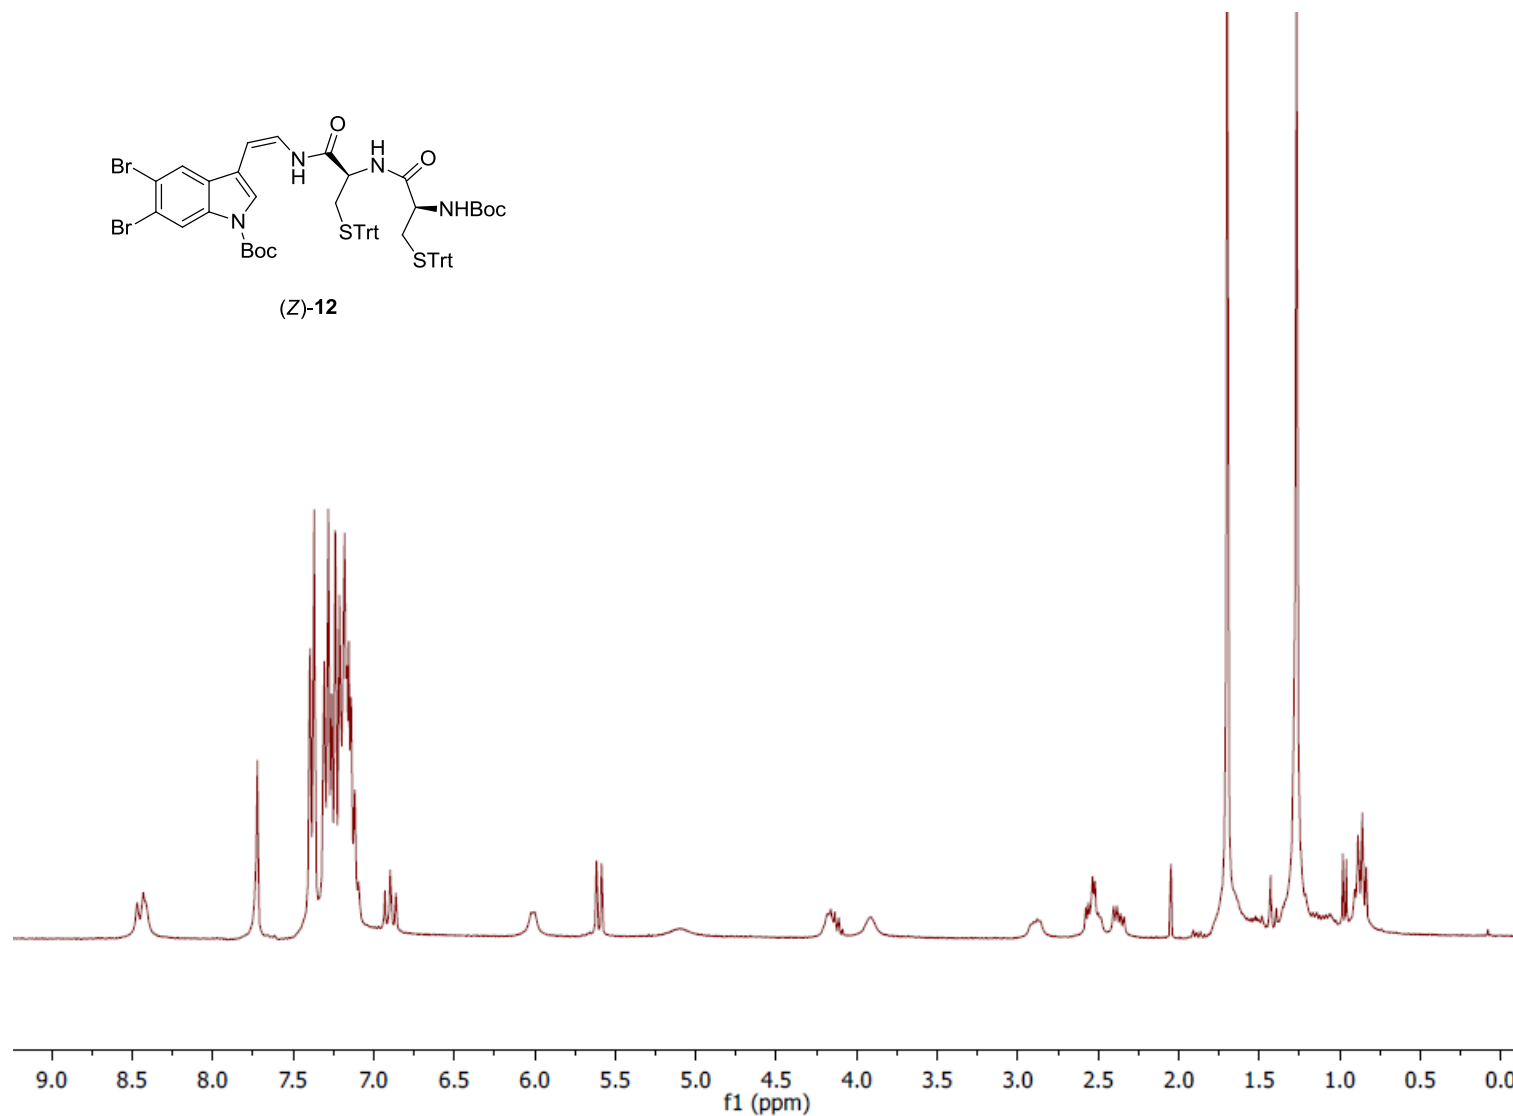

**Figure S32.**  $^{13}\text{C}$  NMR spectrum of *tert*-butyl 5,6-dibromo-3-((6*R*,9*R*,*Z*)-2,2-dimethyl-4,7,10-trioxo-6,9-bis((tritylthio)methyl)-3-oxa-5,8,11-triazatridec-12-en-13-yl)-1*H*-indole-1-carboxylate (**Z-12**) (75 MHz,  $\text{CDCl}_3$ ).

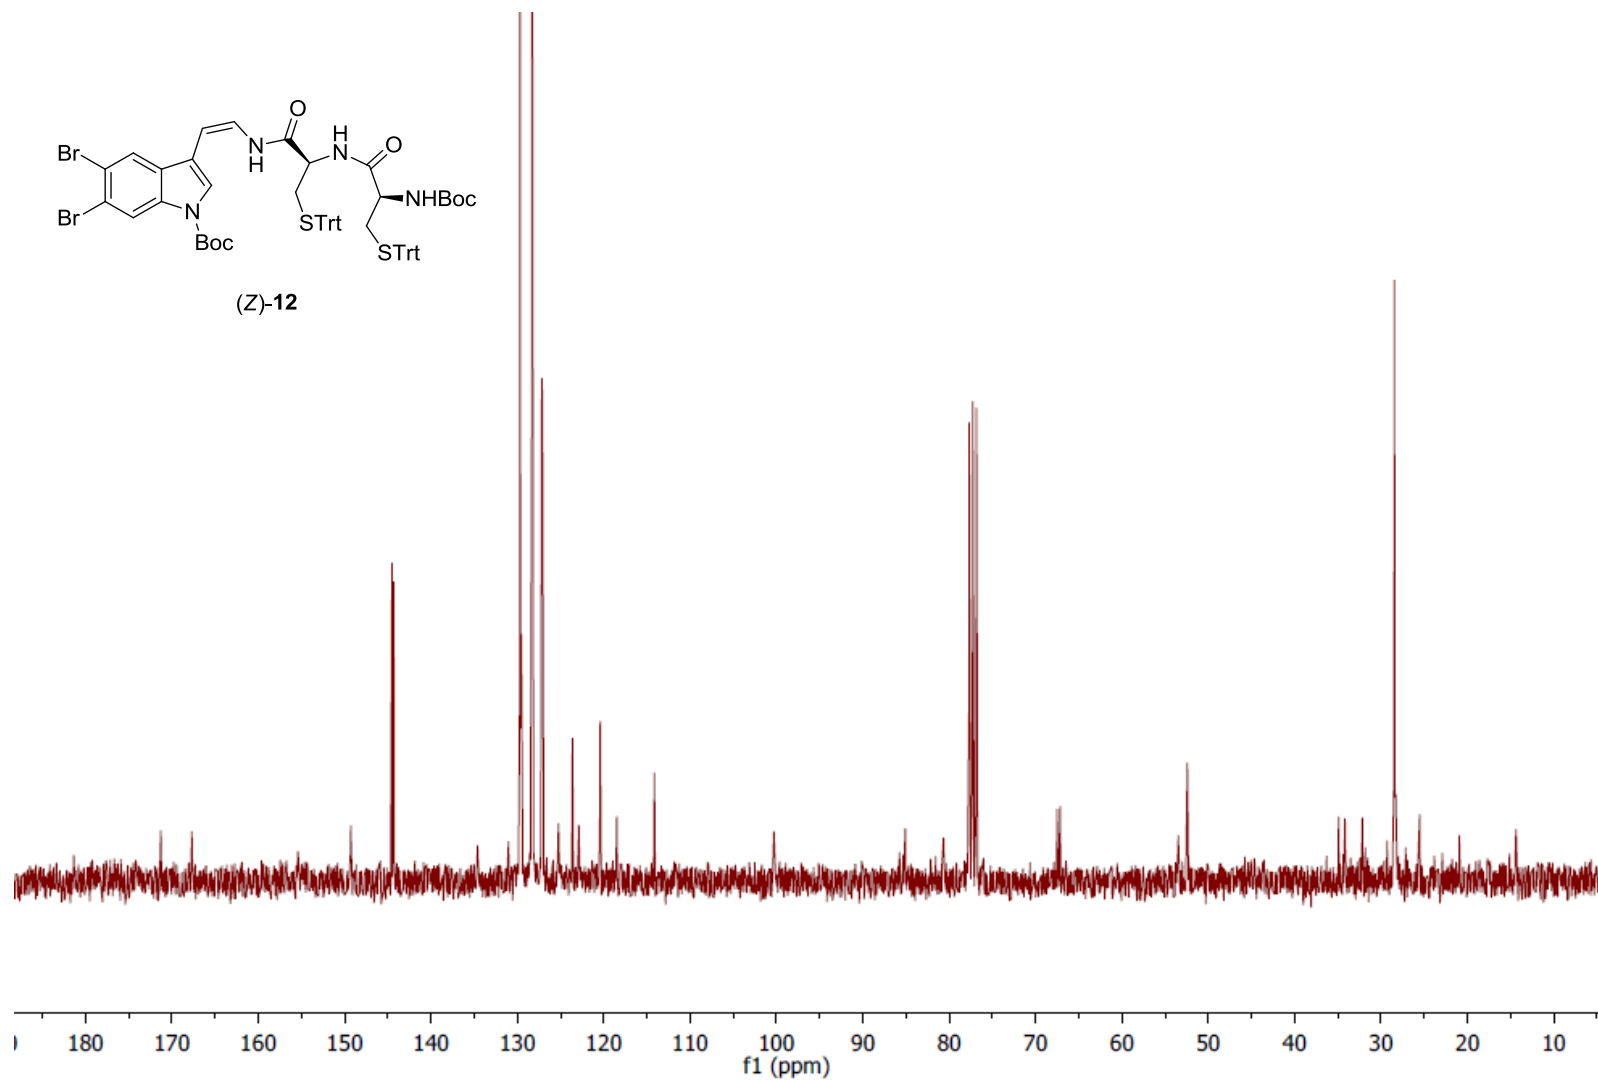

**Figure S33.**  $^1\text{H}$  NMR spectrum of *tert*-butyl 5,6-dibromo-3-((6*R*,9*R*,*E*)-2,2-dimethyl-4,7,10-trioxo-6,9-bis((tritylthio)methyl)-3-oxa-5,8,11-triazatridec-12-en-13-yl)-1*H*-indole-1-carboxylate (*E*-12) (300 MHz,  $\text{CDCl}_3$ ).

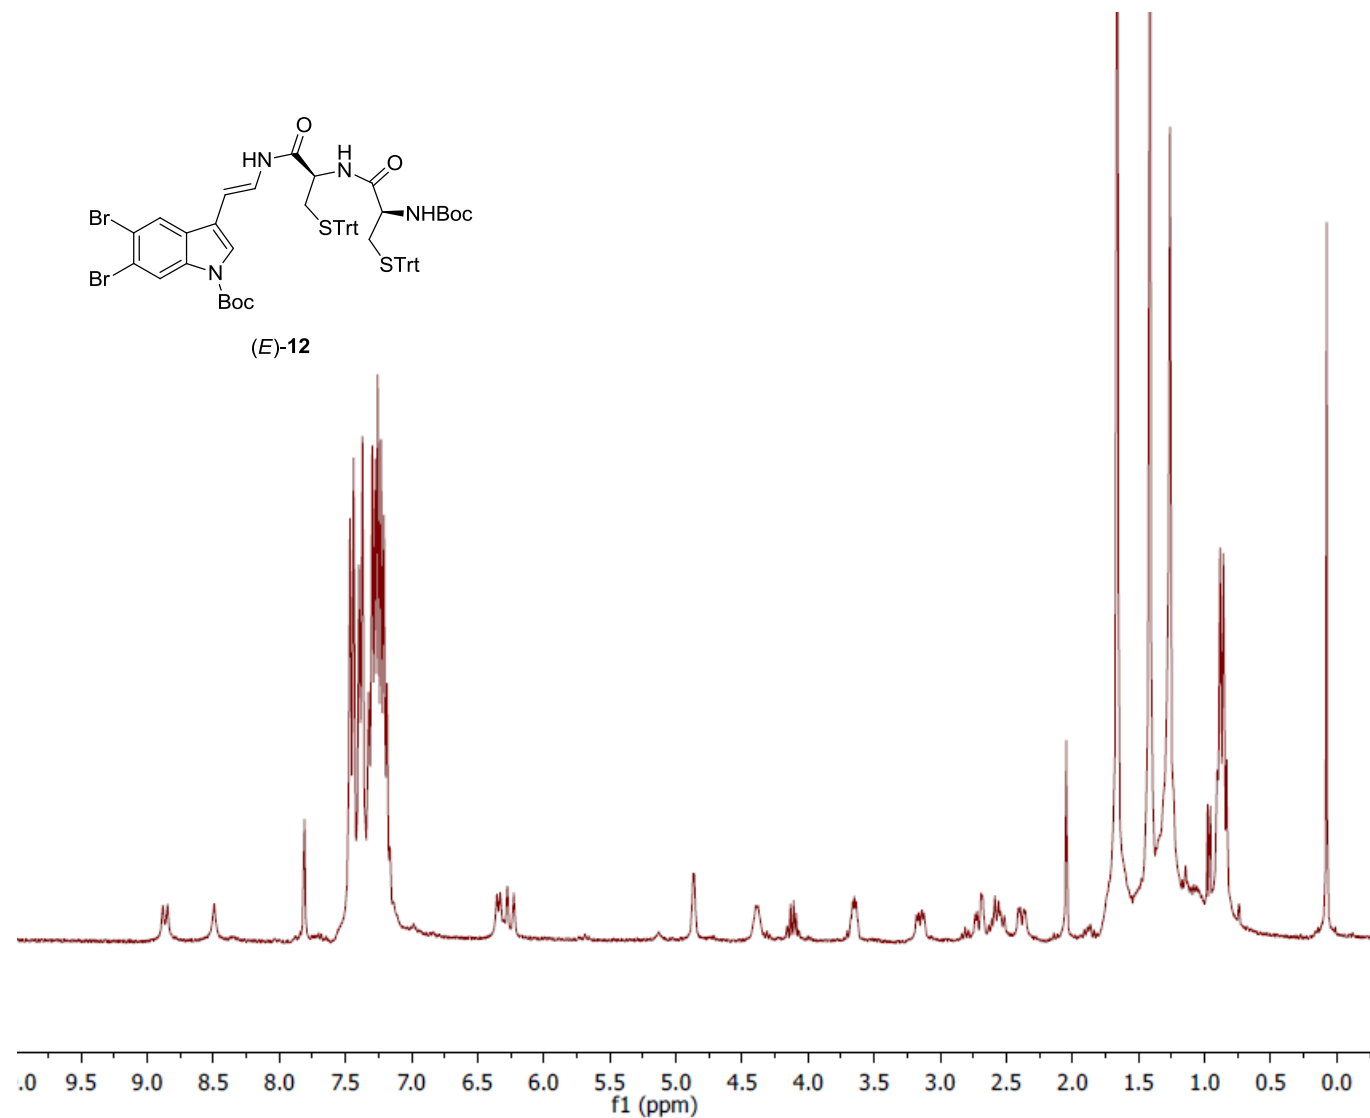

**Figure S34.**  $^1\text{H}$  NMR spectrum of *tert*-butyl 5,6-dibromo-3-((*Z*)-2-((4*R*,7*R*)-7-((*tert*-butoxycarbonyl)amino)-6-oxo-1,2,5-dithiazocane-4-carboxamido)vinyl)-1*H*-indole-1-carboxylate (**Z-13**) (300 MHz,  $\text{CDCl}_3$ ).

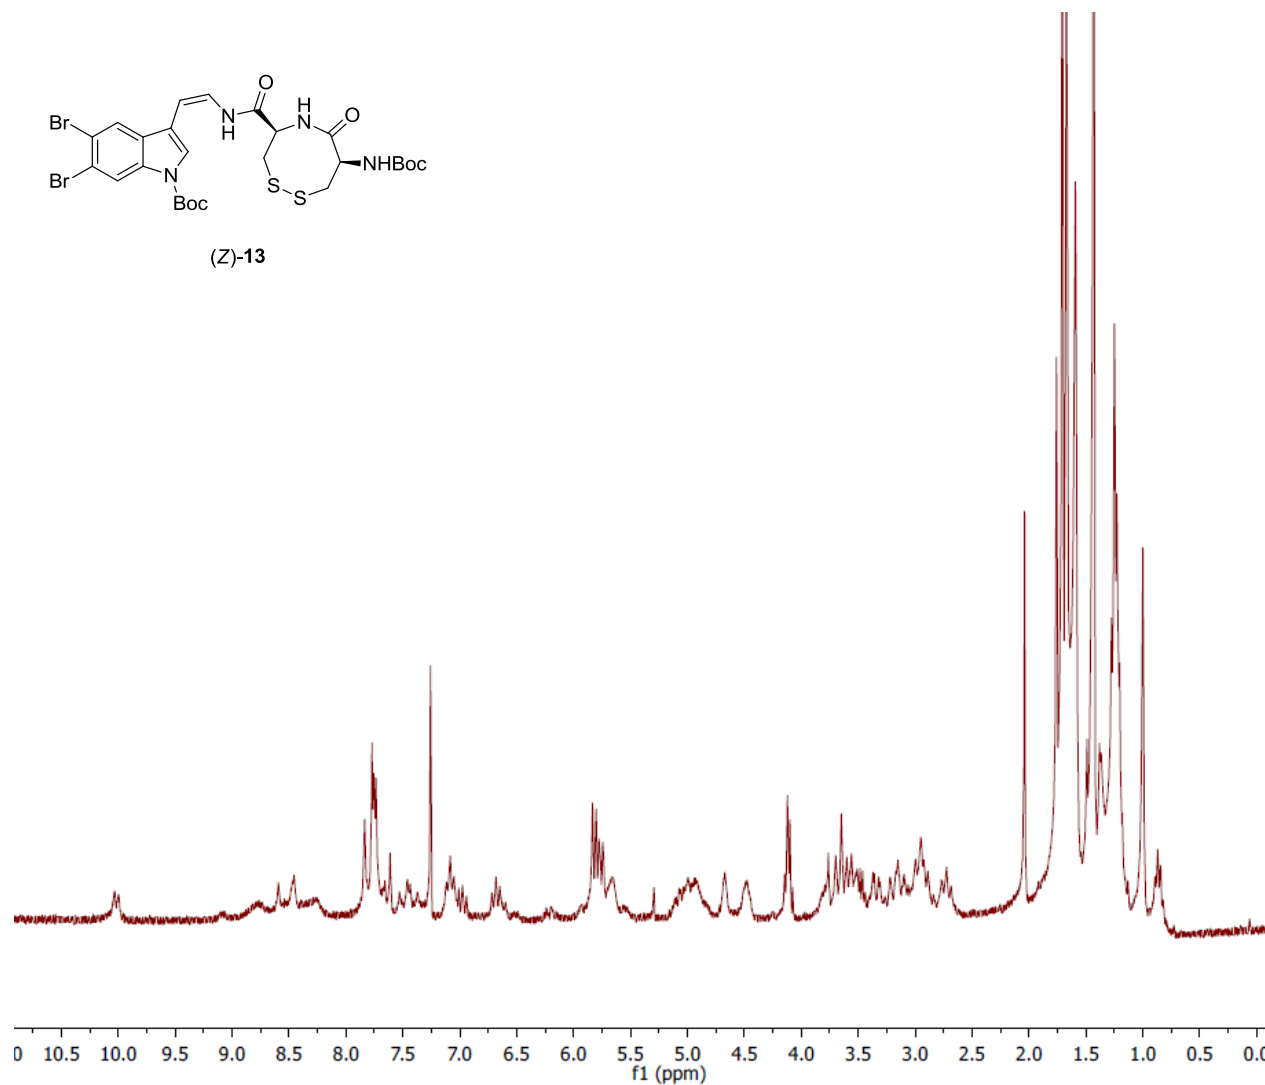

**Figure S35.**  $^{13}\text{C}$  NMR spectrum of *tert*-butyl 5,6-dibromo-3-((*Z*)-2-((4*R*,7*R*)-7-((*tert*-butoxycarbonyl)amino)-6-oxo-1,2,5-dithiazocane-4-carboxamido)vinyl)-1*H*-indole-1-carboxylate (**Z-13**) (75 MHz,  $\text{CDCl}_3$ ).

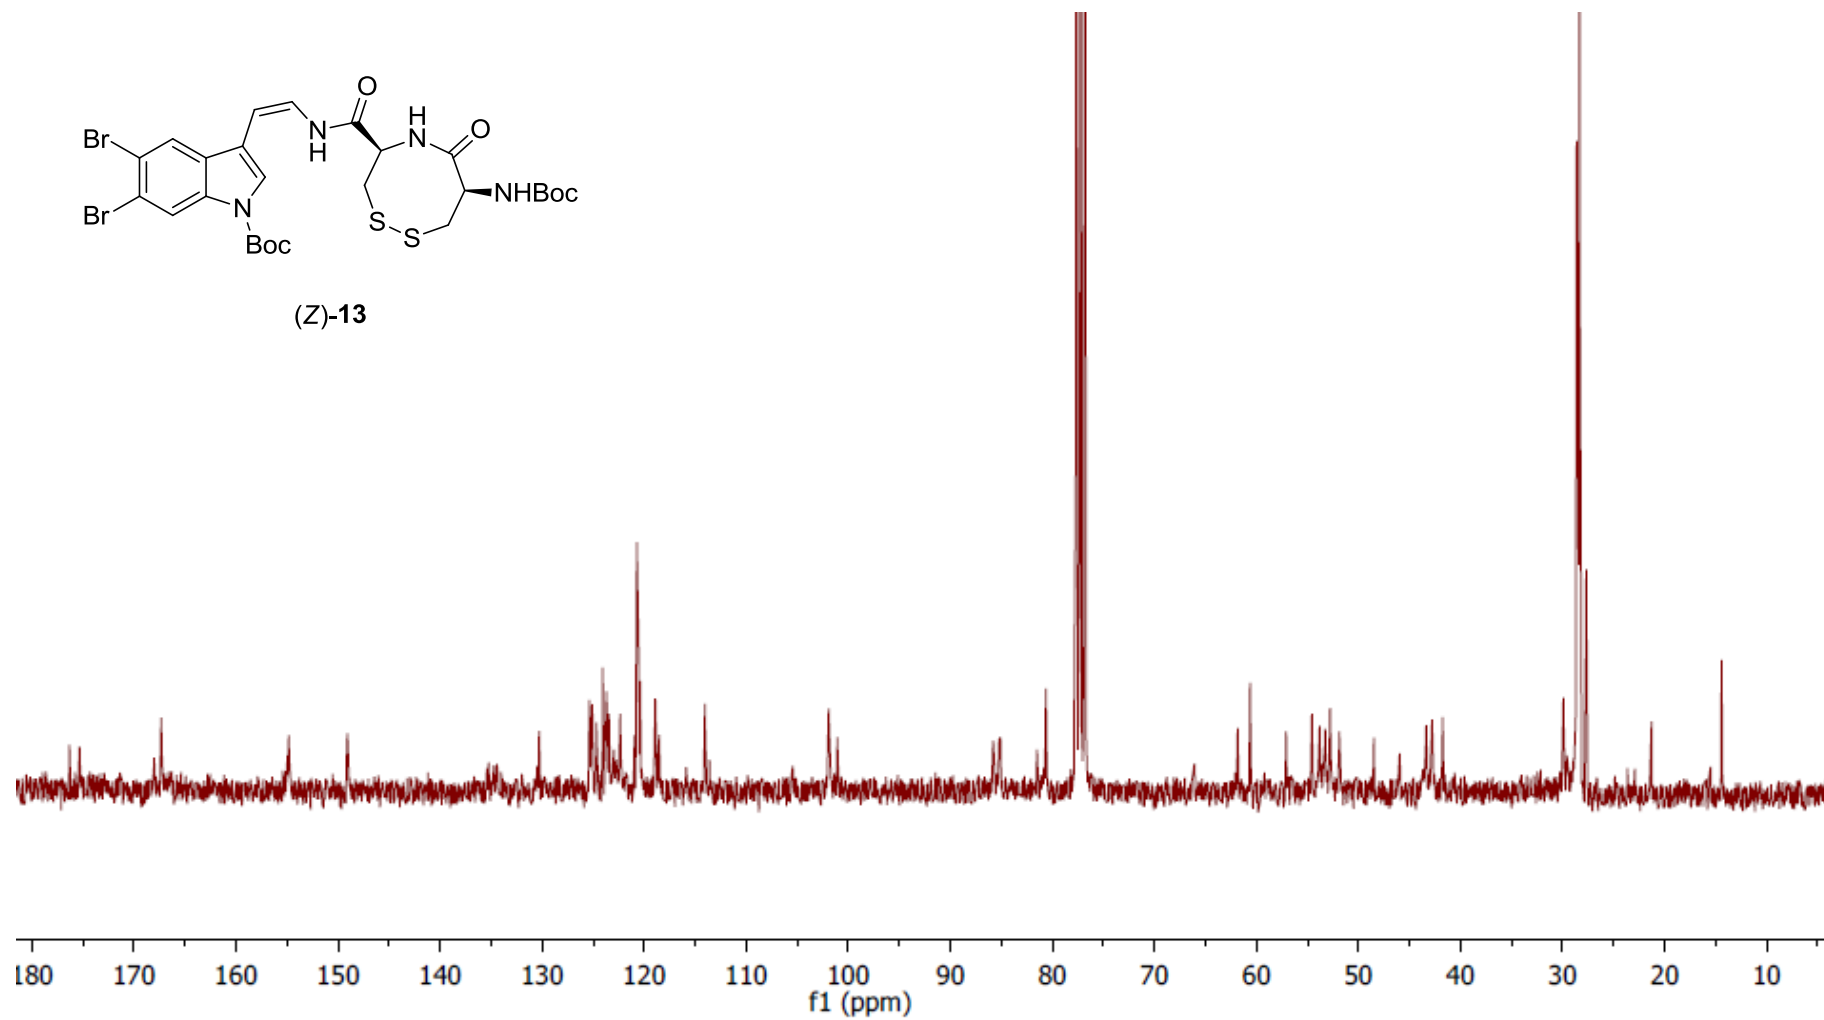

**Figure S36.**  $^1\text{H}$  NMR spectrum of *tert*-butyl 5,6-dibromo-3-((*E*)-2-((4*R*,7*R*)-7-((*tert*-butoxycarbonyl)amino)-6-oxo-1,2,5-dithiazocane-4-carboxamido)vinyl)-1*H*-indole-1-carboxylate (*E*-13) (300 MHz,  $\text{CDCl}_3$ ).

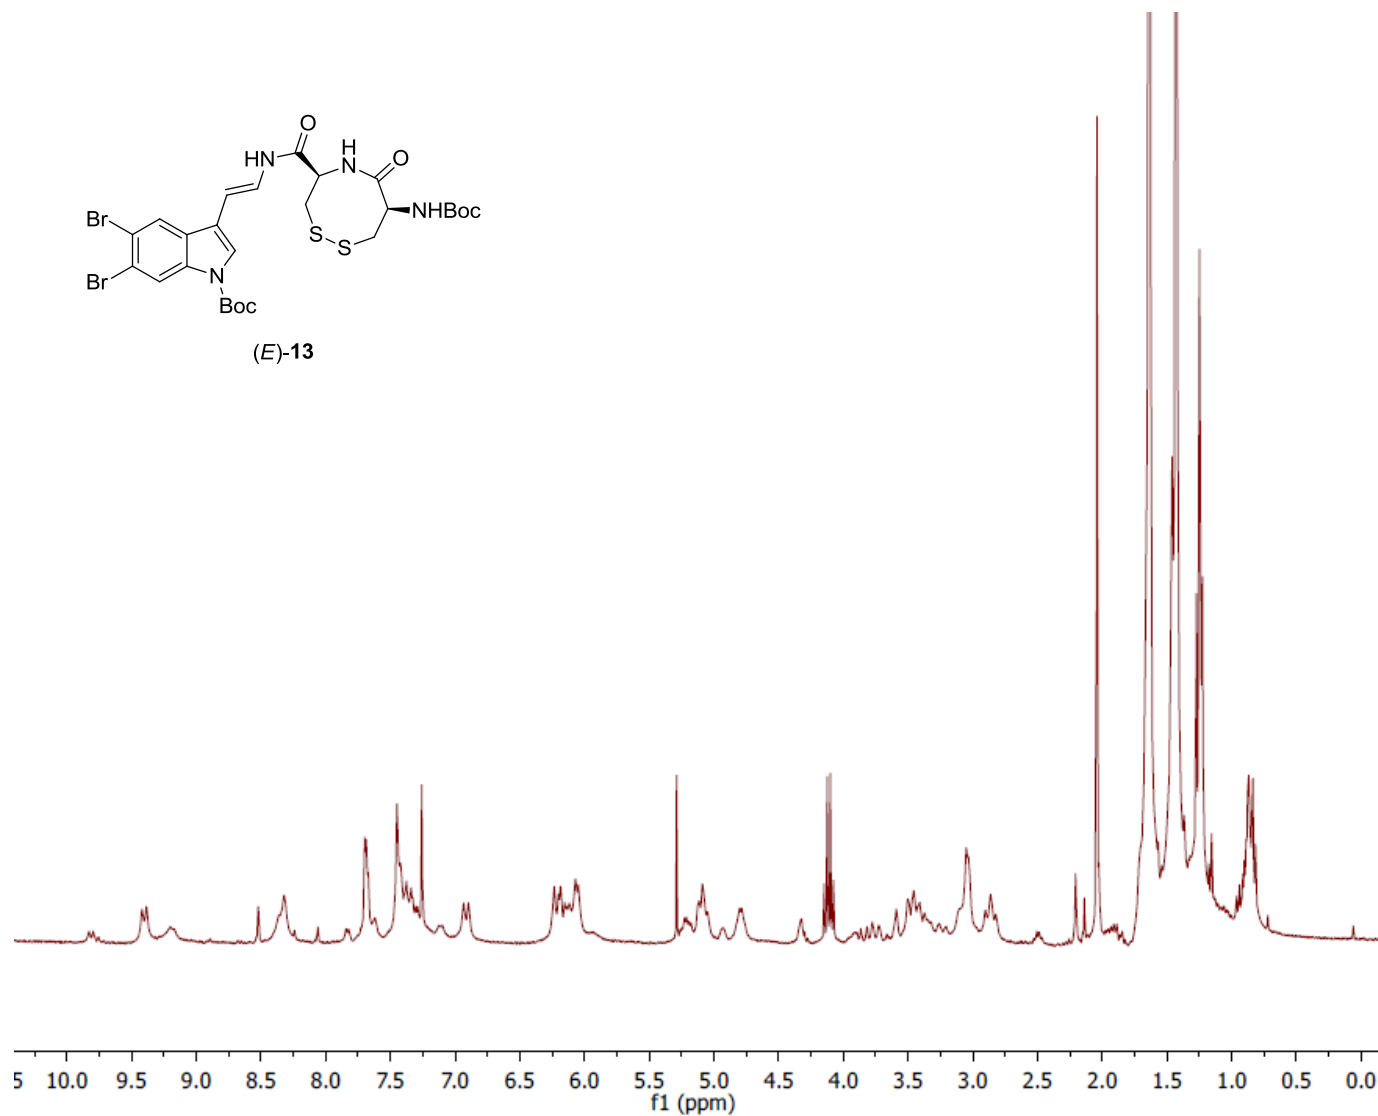

**Figure S37.**  $^{13}\text{C}$  NMR spectrum of *tert*-butyl 5,6-dibromo-3-((*E*)-2-((4*R*,7*R*)-7-((*tert*-butoxycarbonyl)amino)-6-oxo-1,2,5-dithiazocane-4-carboxamido)vinyl)-1*H*-indole-1-carboxylate (*E*-13) (75 MHz,  $\text{CDCl}_3$ ).

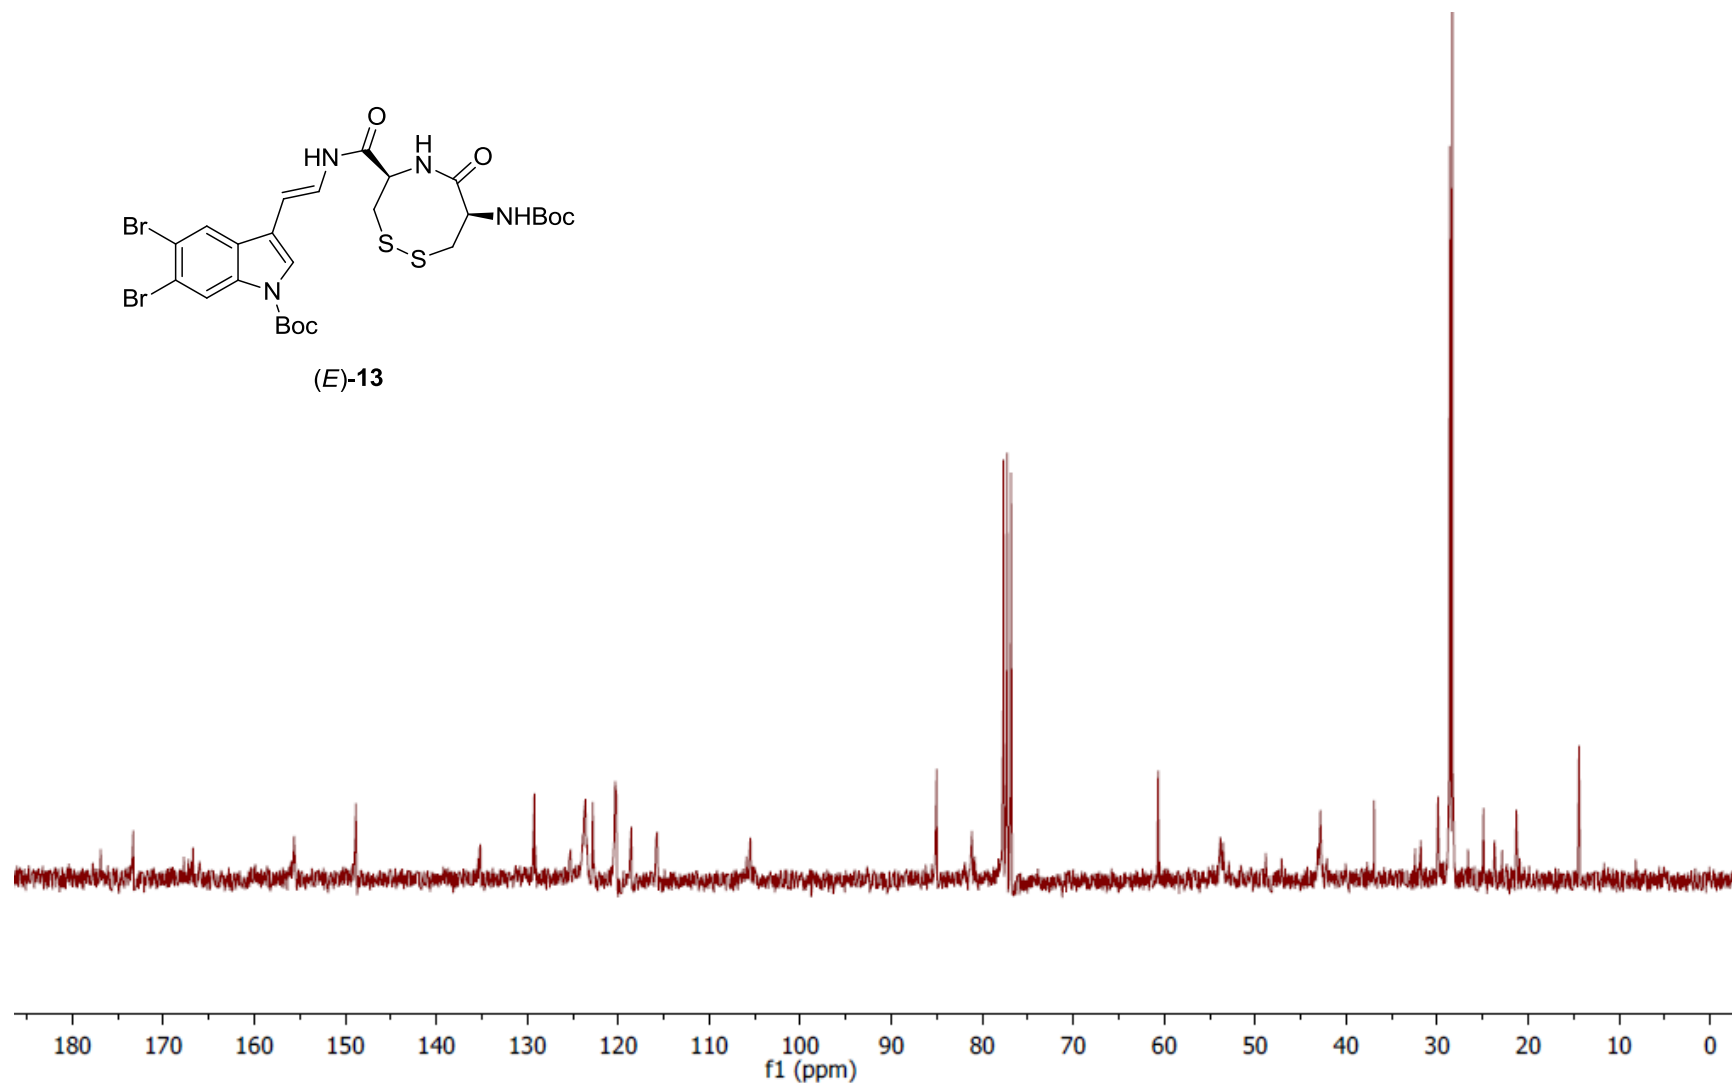

Figure S38. <sup>1</sup>H NMR spectra of synthetic vs. natural Tanjungide A.

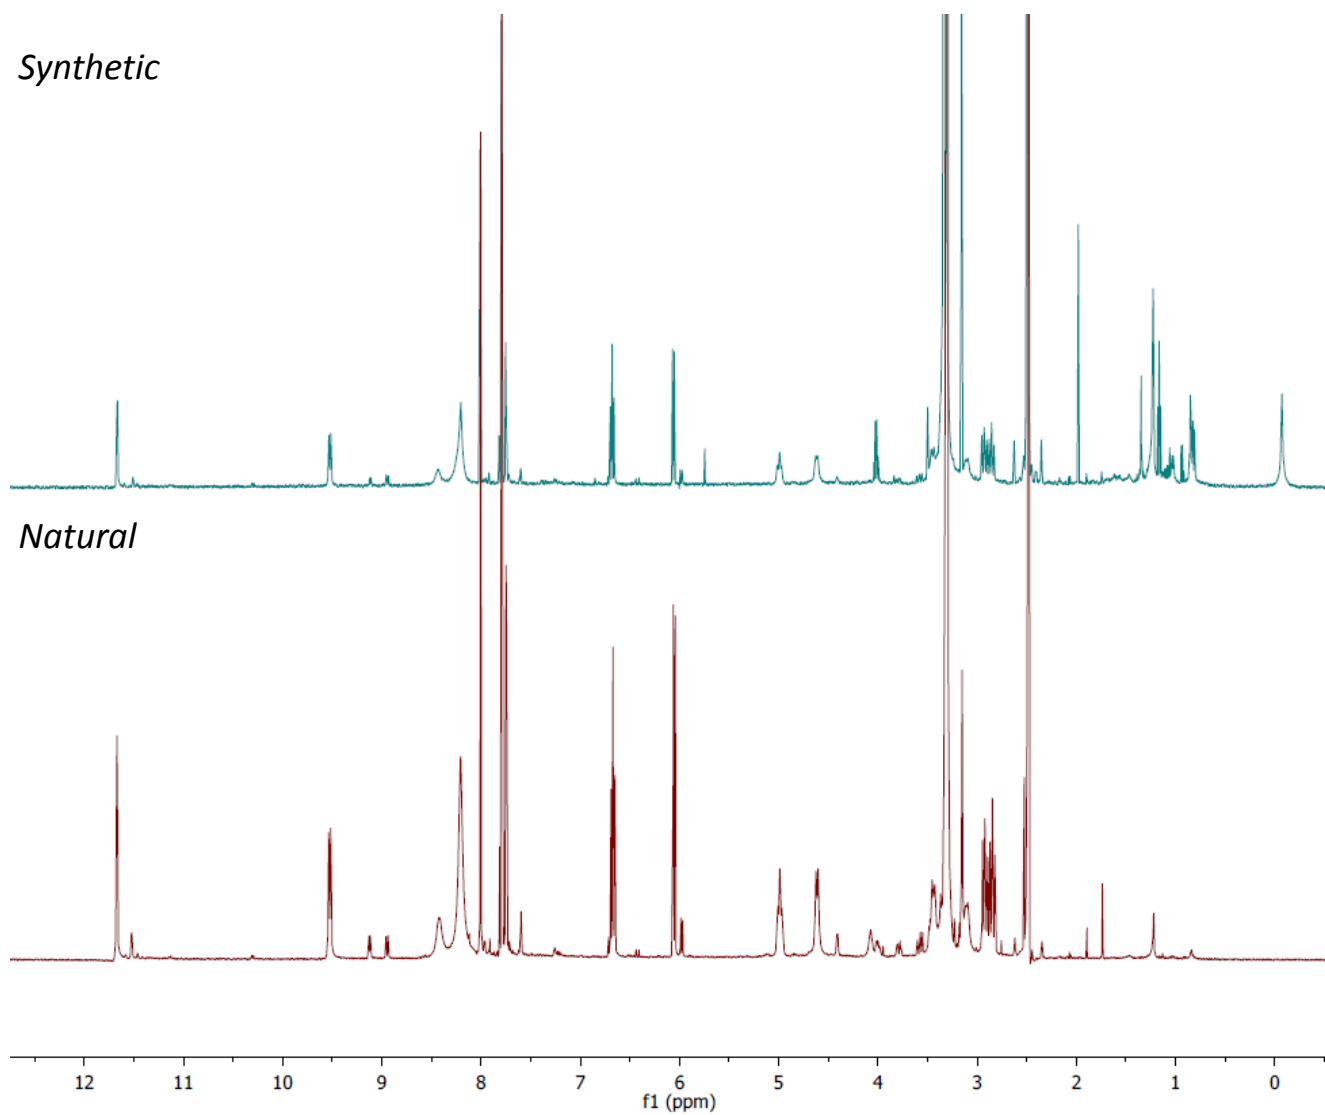



**Figure S39.** Marfey's reaction. Desthiotanjungide A.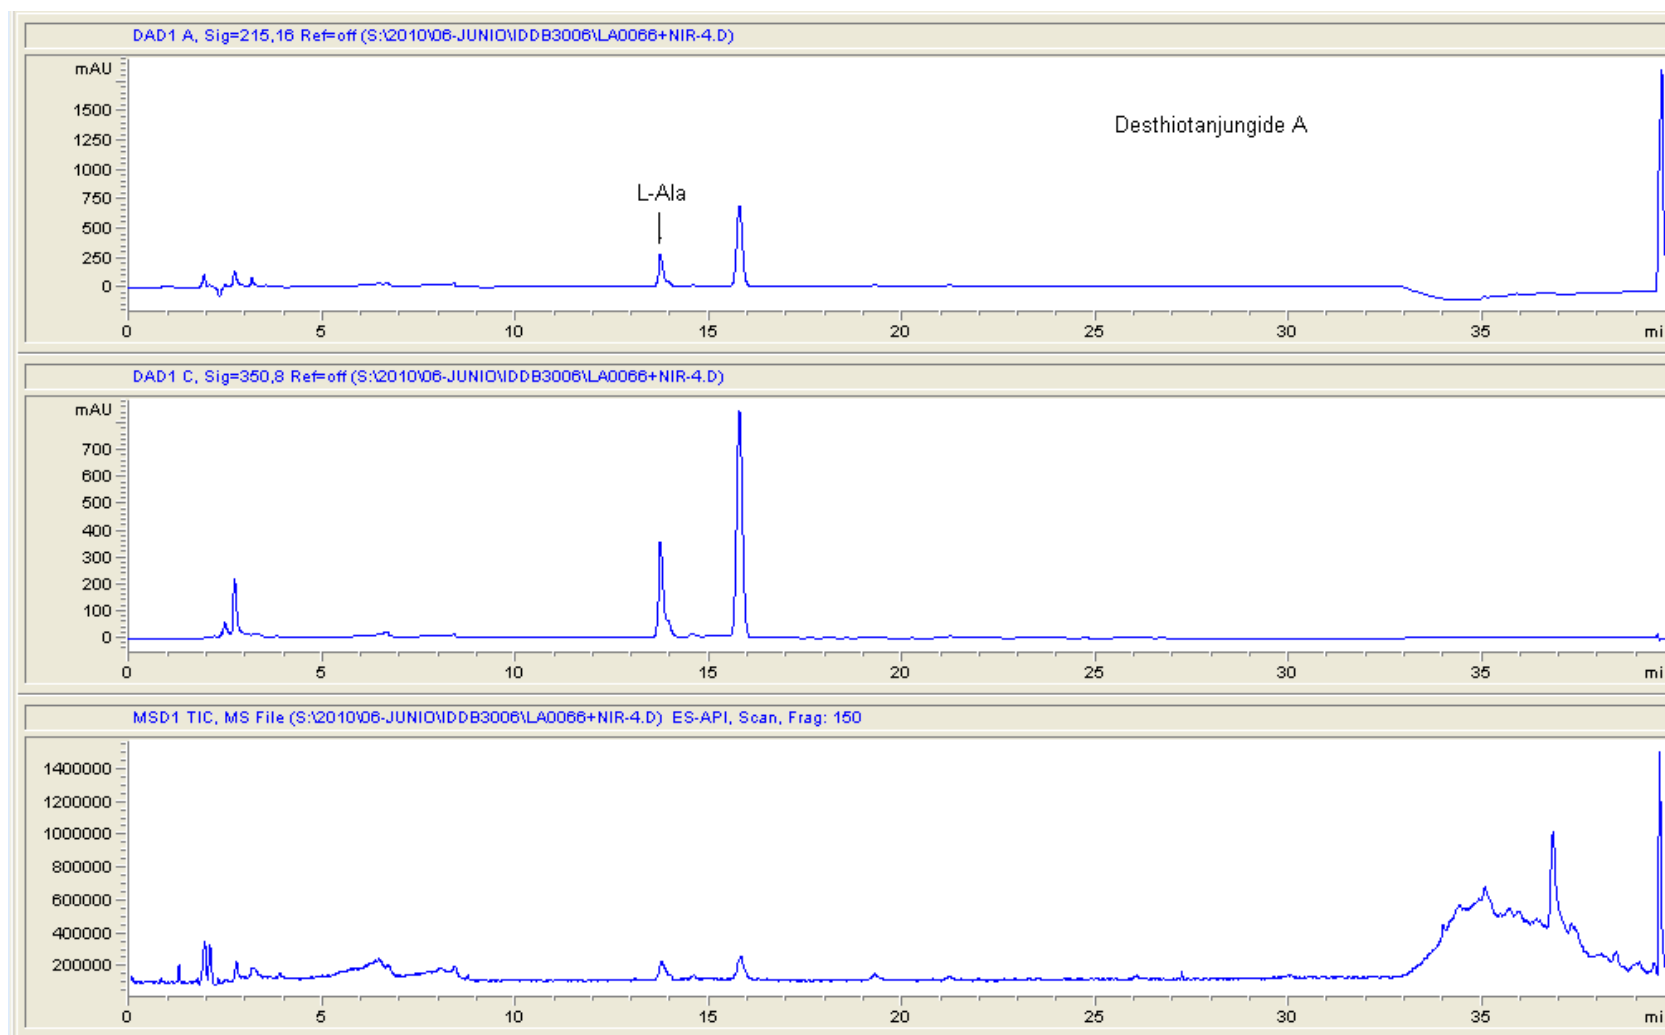

Supplement: marinedrugs-12-01116-s001.pdf [file marinedrugs-12-01116-s001.pdf]
